# Supplementary material for: Compound vulnerabilities exacerbate systemic risks of food security in Somalia
Source: Research Square preprint supplement (doi:10.21203/rs.3.rs-893022/v1), 2021-09-14
Supplement: Supplementary file 1 [file 2f8b23d73a2c205df53e9f51.xlsx]

## Sheet: Conflict incidents
event_id_no_cnty (unique values only)	event_date	year	total events	Conflict events by year	Total conflict incidents by year	Conflict incidents, including Al Shabaab	Conflict incidents, excluding Al Shabaab		Datasource	https://www.acleddata.com/data/
28828	2011-01-03	2011	21878	2011	1393	553	840
6904	2011-01-05	2011		2012	2145	914	1231		ACLED Data Columns	https://www.acleddata.com/wp-content/uploads/dlm_uploads/2017/10/ACLED_Codebook_2019FINAL_pbl.pdf
6903	2011-01-05	2011		2013	3136	1079	2057
6906	2011-01-20	2011		2014	2946	1293	1653
6905	2011-01-20	2011		2015	2362	1106	1256
6907	2011-01-21	2011		2016	2664	1246	1418
6908	2011-01-22	2011		2017	3033	1718	1315
6909	2011-01-31	2011		2018	2830	1571	1259
6910	2011-02-05	2011		2019	1369	698	671
6911	2011-02-15	2011
6912	2011-02-19	2011		sum	21878	10178	11700
6913	2011-02-20	2011		Sum match?	yes
6917	2011-02-21	2011		Distribution of conflict actors		0.465216	0.534784
6914	2011-02-21	2011
6916	2011-02-21	2011
6915	2011-02-21	2011
6921	2011-02-22	2011
6920	2011-02-22	2011
6918	2011-02-22	2011
6919	2011-02-22	2011
6931	2011-02-23	2011
6929	2011-02-23	2011
6928	2011-02-23	2011
6927	2011-02-23	2011
6924	2011-02-23	2011
6930	2011-02-23	2011
6926	2011-02-23	2011
6923	2011-02-23	2011
6932	2011-02-23	2011
6925	2011-02-23	2011
6922	2011-02-23	2011
6942	2011-02-24	2011
6934	2011-02-24	2011
6943	2011-02-24	2011
6936	2011-02-24	2011
6935	2011-02-24	2011
6941	2011-02-24	2011
6933	2011-02-24	2011
6940	2011-02-24	2011
6939	2011-02-24	2011
6938	2011-02-24	2011
6937	2011-02-24	2011
6947	2011-02-25	2011
6946	2011-02-25	2011
6948	2011-02-25	2011
6945	2011-02-25	2011
6944	2011-02-25	2011
6951	2011-02-26	2011
6950	2011-02-26	2011
6952	2011-02-26	2011
6949	2011-02-26	2011
6953	2011-02-27	2011
6955	2011-02-27	2011
6954	2011-02-27	2011
6957	2011-02-28	2011
6960	2011-02-28	2011
6959	2011-02-28	2011
6956	2011-02-28	2011
6958	2011-02-28	2011
6964	2011-03-01	2011
6963	2011-03-01	2011
6961	2011-03-01	2011
6962	2011-03-01	2011
6965	2011-03-01	2011
6969	2011-03-02	2011
6968	2011-03-02	2011
6970	2011-03-02	2011
6966	2011-03-02	2011
6971	2011-03-02	2011
6967	2011-03-02	2011
6972	2011-03-03	2011
6973	2011-03-04	2011
6975	2011-03-04	2011
6974	2011-03-04	2011
6976	2011-03-05	2011
6977	2011-03-05	2011
6978	2011-03-05	2011
6979	2011-03-06	2011
6980	2011-03-07	2011
6981	2011-03-07	2011
6984	2011-03-07	2011
6982	2011-03-07	2011
6983	2011-03-07	2011
6986	2011-03-08	2011
6985	2011-03-08	2011
6987	2011-03-08	2011
6988	2011-03-08	2011
6989	2011-03-09	2011
6990	2011-03-09	2011
6991	2011-03-10	2011
6994	2011-03-10	2011
6993	2011-03-10	2011
6992	2011-03-10	2011
6997	2011-03-11	2011
6996	2011-03-11	2011
6999	2011-03-11	2011
6998	2011-03-11	2011
6995	2011-03-11	2011
7001	2011-03-12	2011
7003	2011-03-12	2011
7002	2011-03-12	2011
7004	2011-03-12	2011
7000	2011-03-12	2011
7008	2011-03-13	2011
7005	2011-03-13	2011
7006	2011-03-13	2011
7007	2011-03-13	2011
7013	2011-03-14	2011
7009	2011-03-14	2011
7014	2011-03-14	2011
7012	2011-03-14	2011
7011	2011-03-14	2011
7010	2011-03-14	2011
7021	2011-03-15	2011
7018	2011-03-15	2011
7017	2011-03-15	2011
7019	2011-03-15	2011
7016	2011-03-15	2011
7020	2011-03-15	2011
7015	2011-03-15	2011
7030	2011-03-16	2011
7028	2011-03-16	2011
7027	2011-03-16	2011
7026	2011-03-16	2011
7025	2011-03-16	2011
7024	2011-03-16	2011
7023	2011-03-16	2011
7029	2011-03-16	2011
7022	2011-03-16	2011
7032	2011-03-17	2011
7033	2011-03-17	2011
7034	2011-03-17	2011
7031	2011-03-17	2011
7036	2011-03-18	2011
7038	2011-03-18	2011
7035	2011-03-18	2011
7037	2011-03-18	2011
7039	2011-03-19	2011
7043	2011-03-19	2011
7046	2011-03-19	2011
7041	2011-03-19	2011
7045	2011-03-19	2011
7040	2011-03-19	2011
7042	2011-03-19	2011
7044	2011-03-19	2011
7049	2011-03-20	2011
7050	2011-03-20	2011
7048	2011-03-20	2011
7052	2011-03-20	2011
7051	2011-03-20	2011
7047	2011-03-20	2011
7054	2011-03-21	2011
7053	2011-03-21	2011
7055	2011-03-21	2011
7056	2011-03-21	2011
7057	2011-03-21	2011
7065	2011-03-22	2011
7064	2011-03-22	2011
7066	2011-03-22	2011
7063	2011-03-22	2011
7062	2011-03-22	2011
7058	2011-03-22	2011
7059	2011-03-22	2011
7060	2011-03-22	2011
7061	2011-03-22	2011
7071	2011-03-23	2011
7072	2011-03-23	2011
7070	2011-03-23	2011
7073	2011-03-23	2011
7067	2011-03-23	2011
7069	2011-03-23	2011
7074	2011-03-23	2011
7078	2011-03-24	2011
7077	2011-03-24	2011
7075	2011-03-24	2011
7079	2011-03-24	2011
7076	2011-03-24	2011
7083	2011-03-25	2011
7082	2011-03-25	2011
7081	2011-03-25	2011
7080	2011-03-25	2011
7087	2011-03-26	2011
7086	2011-03-26	2011
7085	2011-03-26	2011
7090	2011-03-26	2011
7084	2011-03-26	2011
7089	2011-03-26	2011
7093	2011-03-27	2011
7092	2011-03-27	2011
7091	2011-03-27	2011
7101	2011-03-28	2011
7098	2011-03-28	2011
7099	2011-03-28	2011
7097	2011-03-28	2011
7094	2011-03-28	2011
7095	2011-03-28	2011
7096	2011-03-28	2011
7102	2011-03-28	2011
7100	2011-03-28	2011
7107	2011-03-29	2011
7106	2011-03-29	2011
7104	2011-03-29	2011
7105	2011-03-29	2011
7109	2011-03-29	2011
7103	2011-03-29	2011
7108	2011-03-29	2011
7113	2011-03-30	2011
7112	2011-03-30	2011
7114	2011-03-30	2011
7116	2011-03-30	2011
7115	2011-03-30	2011
7111	2011-03-30	2011
7110	2011-03-30	2011
7119	2011-03-31	2011
7117	2011-03-31	2011
7118	2011-03-31	2011
7120	2011-04-01	2011
7122	2011-04-01	2011
7121	2011-04-01	2011
7123	2011-04-01	2011
7126	2011-04-02	2011
7128	2011-04-02	2011
7125	2011-04-02	2011
7127	2011-04-02	2011
7132	2011-04-02	2011
7133	2011-04-02	2011
7124	2011-04-02	2011
7130	2011-04-02	2011
7131	2011-04-02	2011
7129	2011-04-02	2011
7136	2011-04-03	2011
7137	2011-04-03	2011
7135	2011-04-03	2011
7139	2011-04-03	2011
7140	2011-04-03	2011
7138	2011-04-03	2011
7141	2011-04-03	2011
7134	2011-04-03	2011
7145	2011-04-04	2011
7144	2011-04-04	2011
7146	2011-04-04	2011
7147	2011-04-04	2011
7142	2011-04-04	2011
7143	2011-04-04	2011
7149	2011-04-05	2011
7148	2011-04-05	2011
7151	2011-04-05	2011
7150	2011-04-05	2011
7154	2011-04-05	2011
7153	2011-04-05	2011
7152	2011-04-05	2011
7164	2011-04-06	2011
7157	2011-04-06	2011
7161	2011-04-06	2011
7160	2011-04-06	2011
7159	2011-04-06	2011
7158	2011-04-06	2011
7156	2011-04-06	2011
7155	2011-04-06	2011
7162	2011-04-06	2011
7163	2011-04-06	2011
7165	2011-04-07	2011
7167	2011-04-08	2011
7166	2011-04-08	2011
7174	2011-04-09	2011
7170	2011-04-09	2011
7169	2011-04-09	2011
7168	2011-04-09	2011
7173	2011-04-09	2011
7171	2011-04-09	2011
7175	2011-04-09	2011
7172	2011-04-09	2011
7182	2011-04-10	2011
7181	2011-04-10	2011
7180	2011-04-10	2011
7179	2011-04-10	2011
7178	2011-04-10	2011
7176	2011-04-10	2011
7177	2011-04-10	2011
7185	2011-04-10	2011
7184	2011-04-10	2011
7183	2011-04-10	2011
7188	2011-04-11	2011
7187	2011-04-11	2011
7190	2011-04-11	2011
7189	2011-04-11	2011
7186	2011-04-11	2011
7195	2011-04-12	2011
7192	2011-04-12	2011
7194	2011-04-12	2011
7193	2011-04-12	2011
7191	2011-04-12	2011
7197	2011-04-13	2011
7196	2011-04-13	2011
7198	2011-04-14	2011
7199	2011-04-15	2011
7200	2011-04-15	2011
7202	2011-04-15	2011
7201	2011-04-15	2011
7205	2011-04-16	2011
7207	2011-04-16	2011
7203	2011-04-16	2011
7209	2011-04-16	2011
7204	2011-04-16	2011
7206	2011-04-16	2011
7208	2011-04-16	2011
7214	2011-04-17	2011
7213	2011-04-17	2011
7212	2011-04-17	2011
7215	2011-04-17	2011
7210	2011-04-17	2011
7216	2011-04-17	2011
7211	2011-04-17	2011
7217	2011-04-17	2011
7221	2011-04-18	2011
7222	2011-04-18	2011
7220	2011-04-18	2011
7223	2011-04-18	2011
7219	2011-04-18	2011
7218	2011-04-18	2011
7225	2011-04-19	2011
7224	2011-04-19	2011
7229	2011-04-20	2011
7228	2011-04-20	2011
7227	2011-04-20	2011
7226	2011-04-20	2011
7230	2011-04-21	2011
7232	2011-04-21	2011
7231	2011-04-21	2011
7236	2011-04-22	2011
7233	2011-04-22	2011
7235	2011-04-22	2011
7234	2011-04-22	2011
7244	2011-04-23	2011
7241	2011-04-23	2011
7242	2011-04-23	2011
7239	2011-04-23	2011
7240	2011-04-23	2011
7238	2011-04-23	2011
7245	2011-04-23	2011
7237	2011-04-23	2011
7243	2011-04-23	2011
7247	2011-04-24	2011
7246	2011-04-24	2011
7248	2011-04-25	2011
7251	2011-04-25	2011
7250	2011-04-25	2011
7249	2011-04-25	2011
7254	2011-04-26	2011
7253	2011-04-26	2011
7255	2011-04-26	2011
7252	2011-04-26	2011
7256	2011-04-27	2011
7258	2011-04-27	2011
7257	2011-04-27	2011
7262	2011-04-28	2011
7263	2011-04-28	2011
7260	2011-04-28	2011
7264	2011-04-28	2011
7261	2011-04-28	2011
7259	2011-04-28	2011
7266	2011-04-30	2011
7268	2011-04-30	2011
7267	2011-04-30	2011
7265	2011-04-30	2011
7269	2011-05-01	2011
7270	2011-05-02	2011
7271	2011-05-05	2011
7274	2011-05-17	2011
7272	2011-05-17	2011
7273	2011-05-17	2011
7276	2011-05-17	2011
7275	2011-05-17	2011
7277	2011-05-18	2011
7280	2011-05-18	2011
7279	2011-05-18	2011
7278	2011-05-18	2011
7281	2011-05-19	2011
7283	2011-05-20	2011
7282	2011-05-20	2011
7290	2011-05-21	2011
7289	2011-05-21	2011
7288	2011-05-21	2011
7287	2011-05-21	2011
7292	2011-05-21	2011
7285	2011-05-21	2011
7286	2011-05-21	2011
7291	2011-05-21	2011
7293	2011-05-22	2011
7294	2011-05-22	2011
7298	2011-05-22	2011
7297	2011-05-22	2011
7296	2011-05-22	2011
7295	2011-05-22	2011
7299	2011-05-22	2011
7300	2011-05-22	2011
7304	2011-05-23	2011
7306	2011-05-23	2011
7303	2011-05-23	2011
7302	2011-05-23	2011
7305	2011-05-23	2011
7301	2011-05-23	2011
7312	2011-05-24	2011
7311	2011-05-24	2011
7310	2011-05-24	2011
7309	2011-05-24	2011
7307	2011-05-24	2011
7308	2011-05-24	2011
7315	2011-05-25	2011
7313	2011-05-25	2011
7314	2011-05-25	2011
7316	2011-05-25	2011
7317	2011-05-26	2011
7318	2011-05-26	2011
7319	2011-05-26	2011
7320	2011-05-26	2011
7321	2011-05-27	2011
7323	2011-05-27	2011
7322	2011-05-27	2011
7326	2011-05-28	2011
7325	2011-05-28	2011
7324	2011-05-28	2011
7327	2011-05-28	2011
7330	2011-05-29	2011
7328	2011-05-29	2011
7329	2011-05-29	2011
7331	2011-05-29	2011
7338	2011-05-30	2011
7339	2011-05-30	2011
7336	2011-05-30	2011
7333	2011-05-30	2011
7332	2011-05-30	2011
7335	2011-05-30	2011
7337	2011-05-30	2011
7334	2011-05-30	2011
7342	2011-05-31	2011
7343	2011-05-31	2011
7340	2011-05-31	2011
7344	2011-05-31	2011
7341	2011-05-31	2011
7346	2011-06-01	2011
7347	2011-06-01	2011
7348	2011-06-02	2011
7349	2011-06-02	2011
7352	2011-06-03	2011
7351	2011-06-03	2011
7350	2011-06-03	2011
7353	2011-06-03	2011
7357	2011-06-04	2011
7356	2011-06-04	2011
7355	2011-06-04	2011
7354	2011-06-04	2011
7358	2011-06-05	2011
7361	2011-06-05	2011
7359	2011-06-05	2011
7360	2011-06-05	2011
7368	2011-06-06	2011
7367	2011-06-06	2011
7366	2011-06-06	2011
7362	2011-06-06	2011
7363	2011-06-06	2011
7365	2011-06-06	2011
7369	2011-06-06	2011
7364	2011-06-06	2011
7371	2011-06-07	2011
7372	2011-06-07	2011
7374	2011-06-07	2011
7370	2011-06-07	2011
7373	2011-06-07	2011
7379	2011-06-08	2011
7378	2011-06-08	2011
7377	2011-06-08	2011
7381	2011-06-08	2011
7380	2011-06-08	2011
7375	2011-06-08	2011
7376	2011-06-08	2011
7382	2011-06-09	2011
7386	2011-06-09	2011
7385	2011-06-09	2011
7384	2011-06-09	2011
7383	2011-06-09	2011
7390	2011-06-10	2011
7391	2011-06-10	2011
7387	2011-06-10	2011
7389	2011-06-10	2011
7388	2011-06-10	2011
7395	2011-06-11	2011
7394	2011-06-11	2011
7393	2011-06-11	2011
7392	2011-06-11	2011
7401	2011-06-12	2011
7400	2011-06-12	2011
7396	2011-06-12	2011
7398	2011-06-12	2011
7402	2011-06-12	2011
7397	2011-06-12	2011
7399	2011-06-12	2011
7403	2011-06-13	2011
7404	2011-06-13	2011
7406	2011-06-13	2011
7405	2011-06-13	2011
7409	2011-06-14	2011
7408	2011-06-14	2011
7411	2011-06-14	2011
7410	2011-06-14	2011
7407	2011-06-14	2011
7419	2011-06-15	2011
7417	2011-06-15	2011
7416	2011-06-15	2011
7414	2011-06-15	2011
7418	2011-06-15	2011
7413	2011-06-15	2011
7420	2011-06-15	2011
7412	2011-06-15	2011
7415	2011-06-15	2011
7421	2011-06-16	2011
7422	2011-06-17	2011
7423	2011-06-17	2011
7425	2011-06-17	2011
7424	2011-06-17	2011
7431	2011-06-18	2011
7426	2011-06-18	2011
7430	2011-06-18	2011
7429	2011-06-18	2011
7432	2011-06-18	2011
7428	2011-06-18	2011
7427	2011-06-18	2011
7433	2011-06-19	2011
7434	2011-06-19	2011
7435	2011-06-19	2011
7439	2011-06-20	2011
7438	2011-06-20	2011
7436	2011-06-20	2011
7437	2011-06-20	2011
7441	2011-06-20	2011
7440	2011-06-20	2011
7444	2011-06-21	2011
7445	2011-06-21	2011
7447	2011-06-21	2011
7443	2011-06-21	2011
7442	2011-06-21	2011
7446	2011-06-21	2011
7448	2011-06-22	2011
7449	2011-06-22	2011
7452	2011-06-23	2011
7451	2011-06-23	2011
7450	2011-06-23	2011
7454	2011-06-24	2011
7455	2011-06-24	2011
7453	2011-06-24	2011
7456	2011-06-25	2011
7458	2011-06-26	2011
7457	2011-06-26	2011
7459	2011-06-26	2011
7460	2011-06-26	2011
7462	2011-06-27	2011
7465	2011-06-27	2011
7461	2011-06-27	2011
7464	2011-06-27	2011
7463	2011-06-27	2011
7469	2011-06-28	2011
7470	2011-06-28	2011
7467	2011-06-28	2011
7472	2011-06-28	2011
7471	2011-06-28	2011
7468	2011-06-28	2011
7474	2011-06-29	2011
7475	2011-06-29	2011
7473	2011-06-29	2011
7476	2011-06-29	2011
7477	2011-06-29	2011
7478	2011-06-29	2011
7482	2011-06-30	2011
7484	2011-06-30	2011
7480	2011-06-30	2011
7483	2011-06-30	2011
7485	2011-07-01	2011
7486	2011-07-01	2011
7487	2011-07-01	2011
7488	2011-07-01	2011
7489	2011-07-02	2011
7491	2011-07-03	2011
7493	2011-07-03	2011
7492	2011-07-03	2011
7490	2011-07-03	2011
7494	2011-07-03	2011
7495	2011-07-04	2011
7498	2011-07-05	2011
7499	2011-07-05	2011
7497	2011-07-05	2011
7496	2011-07-05	2011
7500	2011-07-06	2011
7501	2011-07-06	2011
7502	2011-07-06	2011
7503	2011-07-07	2011
7507	2011-07-07	2011
7505	2011-07-07	2011
7506	2011-07-07	2011
7504	2011-07-07	2011
7508	2011-07-08	2011
7509	2011-07-09	2011
7511	2011-07-09	2011
7510	2011-07-09	2011
7513	2011-07-10	2011
7514	2011-07-10	2011
7516	2011-07-10	2011
7515	2011-07-10	2011
7512	2011-07-10	2011
7517	2011-07-11	2011
7518	2011-07-11	2011
7521	2011-07-12	2011
7519	2011-07-12	2011
7520	2011-07-12	2011
7523	2011-07-13	2011
7524	2011-07-13	2011
7522	2011-07-13	2011
7526	2011-07-14	2011
7528	2011-07-14	2011
7527	2011-07-14	2011
7529	2011-07-14	2011
7530	2011-07-15	2011
7531	2011-07-15	2011
7533	2011-07-16	2011
7534	2011-07-16	2011
7532	2011-07-16	2011
7535	2011-07-16	2011
7539	2011-07-17	2011
7537	2011-07-17	2011
7536	2011-07-17	2011
7540	2011-07-17	2011
7538	2011-07-17	2011
7541	2011-07-18	2011
7542	2011-07-18	2011
7549	2011-07-19	2011
7544	2011-07-19	2011
7548	2011-07-19	2011
7552	2011-07-19	2011
7546	2011-07-19	2011
7545	2011-07-19	2011
7550	2011-07-19	2011
7551	2011-07-19	2011
7547	2011-07-19	2011
7553	2011-07-19	2011
7555	2011-07-20	2011
7556	2011-07-21	2011
7558	2011-07-21	2011
7557	2011-07-21	2011
7559	2011-07-21	2011
7560	2011-07-21	2011
7563	2011-07-22	2011
7565	2011-07-22	2011
7562	2011-07-22	2011
7561	2011-07-22	2011
7564	2011-07-22	2011
7570	2011-07-23	2011
7569	2011-07-23	2011
7567	2011-07-23	2011
7566	2011-07-23	2011
7568	2011-07-23	2011
7575	2011-07-24	2011
7573	2011-07-24	2011
7574	2011-07-24	2011
7576	2011-07-24	2011
7571	2011-07-24	2011
7572	2011-07-24	2011
7581	2011-07-25	2011
7578	2011-07-25	2011
7579	2011-07-25	2011
7580	2011-07-25	2011
7582	2011-07-25	2011
7584	2011-07-26	2011
7583	2011-07-26	2011
7585	2011-07-26	2011
7587	2011-07-27	2011
7589	2011-07-27	2011
7588	2011-07-27	2011
7586	2011-07-27	2011
7595	2011-07-28	2011
7596	2011-07-28	2011
7594	2011-07-28	2011
7593	2011-07-28	2011
7592	2011-07-28	2011
7591	2011-07-28	2011
7597	2011-07-28	2011
7600	2011-07-28	2011
7599	2011-07-28	2011
7590	2011-07-28	2011
7598	2011-07-28	2011
7601	2011-07-28	2011
7607	2011-07-29	2011
7606	2011-07-29	2011
7605	2011-07-29	2011
7604	2011-07-29	2011
7602	2011-07-29	2011
7603	2011-07-29	2011
7610	2011-07-30	2011
7609	2011-07-30	2011
7608	2011-07-30	2011
7613	2011-07-31	2011
7616	2011-07-31	2011
7614	2011-07-31	2011
7615	2011-07-31	2011
7617	2011-07-31	2011
7612	2011-07-31	2011
7619	2011-08-01	2011
7618	2011-08-01	2011
7620	2011-08-01	2011
7623	2011-08-02	2011
7624	2011-08-02	2011
7622	2011-08-02	2011
7621	2011-08-02	2011
7627	2011-08-03	2011
7626	2011-08-03	2011
7628	2011-08-04	2011
7632	2011-08-04	2011
7630	2011-08-04	2011
7631	2011-08-04	2011
7629	2011-08-04	2011
7636	2011-08-05	2011
7635	2011-08-05	2011
7634	2011-08-05	2011
7638	2011-08-05	2011
7633	2011-08-05	2011
7637	2011-08-05	2011
7650	2011-08-06	2011
7651	2011-08-06	2011
7646	2011-08-06	2011
7647	2011-08-06	2011
7639	2011-08-06	2011
7645	2011-08-06	2011
7644	2011-08-06	2011
7643	2011-08-06	2011
7642	2011-08-06	2011
7641	2011-08-06	2011
7640	2011-08-06	2011
7648	2011-08-06	2011
7649	2011-08-06	2011
7652	2011-08-07	2011
7656	2011-08-07	2011
7655	2011-08-07	2011
7654	2011-08-07	2011
7657	2011-08-07	2011
7660	2011-08-07	2011
7661	2011-08-07	2011
7658	2011-08-07	2011
7659	2011-08-07	2011
7662	2011-08-08	2011
7663	2011-08-08	2011
7664	2011-08-08	2011
7665	2011-08-08	2011
7666	2011-08-08	2011
7667	2011-08-08	2011
7669	2011-08-09	2011
7668	2011-08-09	2011
7670	2011-08-09	2011
7672	2011-08-10	2011
7671	2011-08-10	2011
7676	2011-08-10	2011
7675	2011-08-10	2011
7674	2011-08-10	2011
7677	2011-08-10	2011
7680	2011-08-10	2011
7679	2011-08-10	2011
7673	2011-08-10	2011
7678	2011-08-10	2011
7684	2011-08-11	2011
7683	2011-08-11	2011
7682	2011-08-11	2011
7681	2011-08-11	2011
7687	2011-08-11	2011
7686	2011-08-11	2011
7685	2011-08-11	2011
7688	2011-08-12	2011
7689	2011-08-12	2011
7690	2011-08-12	2011
7691	2011-08-12	2011
7695	2011-08-13	2011
7694	2011-08-13	2011
7692	2011-08-13	2011
7693	2011-08-13	2011
7704	2011-08-14	2011
7699	2011-08-14	2011
7702	2011-08-14	2011
7697	2011-08-14	2011
7698	2011-08-14	2011
7707	2011-08-14	2011
7706	2011-08-14	2011
7705	2011-08-14	2011
7703	2011-08-14	2011
7701	2011-08-14	2011
7717	2011-08-15	2011
7716	2011-08-15	2011
7709	2011-08-15	2011
7711	2011-08-15	2011
7713	2011-08-15	2011
7712	2011-08-15	2011
7718	2011-08-15	2011
7714	2011-08-15	2011
7715	2011-08-15	2011
7710	2011-08-15	2011
7708	2011-08-15	2011
7729	2011-08-16	2011
7723	2011-08-16	2011
7721	2011-08-16	2011
7722	2011-08-16	2011
7719	2011-08-16	2011
7728	2011-08-16	2011
7724	2011-08-16	2011
7727	2011-08-16	2011
7726	2011-08-16	2011
7725	2011-08-16	2011
7720	2011-08-16	2011
7732	2011-08-17	2011
7731	2011-08-17	2011
7737	2011-08-17	2011
7736	2011-08-17	2011
7733	2011-08-17	2011
7735	2011-08-17	2011
7734	2011-08-17	2011
7740	2011-08-18	2011
7739	2011-08-18	2011
7738	2011-08-18	2011
7745	2011-08-19	2011
7744	2011-08-19	2011
7746	2011-08-19	2011
7743	2011-08-19	2011
7747	2011-08-19	2011
7749	2011-08-19	2011
7742	2011-08-19	2011
7748	2011-08-19	2011
7757	2011-08-20	2011
7753	2011-08-20	2011
7756	2011-08-20	2011
7755	2011-08-20	2011
7752	2011-08-20	2011
7754	2011-08-20	2011
7750	2011-08-20	2011
7751	2011-08-20	2011
7760	2011-08-21	2011
7759	2011-08-21	2011
7761	2011-08-21	2011
7763	2011-08-21	2011
7758	2011-08-21	2011
7762	2011-08-21	2011
7770	2011-08-22	2011
7771	2011-08-22	2011
7769	2011-08-22	2011
7765	2011-08-22	2011
7772	2011-08-22	2011
7766	2011-08-22	2011
7764	2011-08-22	2011
7768	2011-08-22	2011
7767	2011-08-22	2011
7774	2011-08-23	2011
7775	2011-08-23	2011
7776	2011-08-23	2011
7773	2011-08-23	2011
7778	2011-08-24	2011
7777	2011-08-24	2011
7779	2011-08-24	2011
7780	2011-08-25	2011
7781	2011-08-25	2011
28829	2011-08-25	2011
7782	2011-08-26	2011
7787	2011-08-26	2011
7786	2011-08-26	2011
7784	2011-08-26	2011
7785	2011-08-26	2011
7783	2011-08-26	2011
7795	2011-08-27	2011
7790	2011-08-27	2011
7796	2011-08-27	2011
7789	2011-08-27	2011
7788	2011-08-27	2011
7797	2011-08-27	2011
7791	2011-08-27	2011
7792	2011-08-27	2011
7793	2011-08-27	2011
7794	2011-08-27	2011
7798	2011-08-27	2011
28830	2011-08-28	2011
7802	2011-08-28	2011
7801	2011-08-28	2011
7799	2011-08-28	2011
7800	2011-08-28	2011
7804	2011-08-28	2011
7803	2011-08-28	2011
7806	2011-08-29	2011
7805	2011-08-29	2011
7809	2011-08-29	2011
7808	2011-08-29	2011
7810	2011-08-29	2011
7811	2011-08-29	2011
7807	2011-08-29	2011
7812	2011-08-30	2011
7817	2011-08-30	2011
7816	2011-08-30	2011
7815	2011-08-30	2011
7818	2011-08-30	2011
7819	2011-08-30	2011
7814	2011-08-30	2011
7820	2011-08-31	2011
7822	2011-08-31	2011
7821	2011-08-31	2011
7823	2011-08-31	2011
7825	2011-09-01	2011
7824	2011-09-01	2011
7826	2011-09-01	2011
7827	2011-09-01	2011
7834	2011-09-02	2011
7829	2011-09-02	2011
7830	2011-09-02	2011
7833	2011-09-02	2011
7832	2011-09-02	2011
7828	2011-09-02	2011
7831	2011-09-02	2011
7835	2011-09-03	2011
7838	2011-09-03	2011
7837	2011-09-03	2011
7836	2011-09-03	2011
7839	2011-09-04	2011
7843	2011-09-04	2011
7842	2011-09-04	2011
7841	2011-09-04	2011
7840	2011-09-04	2011
7846	2011-09-05	2011
7847	2011-09-05	2011
7844	2011-09-05	2011
7845	2011-09-05	2011
7854	2011-09-06	2011
7849	2011-09-06	2011
7852	2011-09-06	2011
7853	2011-09-06	2011
7848	2011-09-06	2011
7851	2011-09-06	2011
7850	2011-09-06	2011
7858	2011-09-07	2011
7863	2011-09-07	2011
7857	2011-09-07	2011
7856	2011-09-07	2011
7859	2011-09-07	2011
7861	2011-09-07	2011
7860	2011-09-07	2011
7865	2011-09-07	2011
7864	2011-09-07	2011
7862	2011-09-07	2011
7855	2011-09-07	2011
7867	2011-09-09	2011
7866	2011-09-09	2011
7868	2011-09-10	2011
7869	2011-09-10	2011
7873	2011-09-11	2011
7870	2011-09-11	2011
7871	2011-09-11	2011
7872	2011-09-11	2011
7877	2011-09-12	2011
7876	2011-09-12	2011
7874	2011-09-12	2011
7875	2011-09-12	2011
7880	2011-09-12	2011
7879	2011-09-12	2011
7878	2011-09-12	2011
7881	2011-09-12	2011
7884	2011-09-13	2011
7882	2011-09-13	2011
7883	2011-09-13	2011
7885	2011-09-14	2011
7886	2011-09-14	2011
7887	2011-09-15	2011
7889	2011-09-16	2011
7888	2011-09-16	2011
7890	2011-09-16	2011
7891	2011-09-17	2011
7892	2011-09-19	2011
7893	2011-09-19	2011
7894	2011-09-20	2011
7896	2011-09-20	2011
7895	2011-09-20	2011
7897	2011-09-21	2011
7898	2011-09-21	2011
7899	2011-09-22	2011
7902	2011-09-23	2011
7900	2011-09-23	2011
7901	2011-09-23	2011
7904	2011-09-24	2011
7905	2011-09-24	2011
7906	2011-09-24	2011
7903	2011-09-24	2011
7908	2011-09-25	2011
7907	2011-09-25	2011
7909	2011-09-27	2011
25566	2011-09-27	2011
25565	2011-09-27	2011
7911	2011-09-28	2011
7910	2011-09-28	2011
7912	2011-09-30	2011
7914	2011-09-30	2011
7913	2011-09-30	2011
7915	2011-09-30	2011
7916	2011-10-01	2011
7918	2011-10-01	2011
7917	2011-10-01	2011
7919	2011-10-01	2011
7921	2011-10-01	2011
7920	2011-10-01	2011
7923	2011-10-02	2011
7922	2011-10-02	2011
7925	2011-10-03	2011
7924	2011-10-03	2011
7926	2011-10-03	2011
7927	2011-10-04	2011
7928	2011-10-04	2011
7929	2011-10-04	2011
28831	2011-10-05	2011
7930	2011-10-05	2011
7932	2011-10-05	2011
7931	2011-10-05	2011
7933	2011-10-06	2011
7934	2011-10-06	2011
7935	2011-10-07	2011
7937	2011-10-07	2011
7936	2011-10-07	2011
7940	2011-10-08	2011
7938	2011-10-08	2011
7939	2011-10-08	2011
7943	2011-10-09	2011
7945	2011-10-09	2011
7941	2011-10-09	2011
7944	2011-10-09	2011
7942	2011-10-09	2011
7949	2011-10-10	2011
7946	2011-10-10	2011
7948	2011-10-10	2011
7947	2011-10-10	2011
7950	2011-10-11	2011
7951	2011-10-11	2011
7952	2011-10-11	2011
7954	2011-10-12	2011
7953	2011-10-12	2011
7956	2011-10-13	2011
7955	2011-10-13	2011
7957	2011-10-14	2011
7958	2011-10-14	2011
7961	2011-10-14	2011
7959	2011-10-14	2011
7960	2011-10-14	2011
7962	2011-10-15	2011
7965	2011-10-16	2011
7963	2011-10-16	2011
7964	2011-10-16	2011
7966	2011-10-16	2011
7967	2011-10-17	2011
7969	2011-10-17	2011
7968	2011-10-17	2011
7973	2011-10-18	2011
7974	2011-10-18	2011
7970	2011-10-18	2011
7971	2011-10-18	2011
7972	2011-10-18	2011
7976	2011-10-19	2011
7975	2011-10-19	2011
7977	2011-10-19	2011
7978	2011-10-19	2011
7980	2011-10-20	2011
7979	2011-10-20	2011
7981	2011-10-21	2011
7982	2011-10-21	2011
7984	2011-10-22	2011
7983	2011-10-22	2011
7985	2011-10-22	2011
7988	2011-10-23	2011
7986	2011-10-23	2011
7987	2011-10-23	2011
7989	2011-10-24	2011
7990	2011-10-24	2011
7991	2011-10-24	2011
7993	2011-10-25	2011
7994	2011-10-25	2011
7992	2011-10-25	2011
7998	2011-10-25	2011
7997	2011-10-25	2011
7996	2011-10-25	2011
7995	2011-10-25	2011
7999	2011-10-25	2011
8002	2011-10-26	2011
8001	2011-10-26	2011
8000	2011-10-26	2011
8003	2011-10-26	2011
8008	2011-10-27	2011
8006	2011-10-27	2011
8004	2011-10-27	2011
8005	2011-10-27	2011
8007	2011-10-27	2011
8009	2011-10-28	2011
8013	2011-10-29	2011
8011	2011-10-29	2011
8010	2011-10-29	2011
8012	2011-10-29	2011
8014	2011-10-29	2011
8015	2011-10-30	2011
8018	2011-10-30	2011
8016	2011-10-30	2011
8017	2011-10-30	2011
8021	2011-10-31	2011
8020	2011-10-31	2011
8019	2011-10-31	2011
8022	2011-10-31	2011
8024	2011-11-01	2011
8025	2011-11-01	2011
8023	2011-11-01	2011
8026	2011-11-01	2011
8029	2011-11-02	2011
8027	2011-11-02	2011
8028	2011-11-02	2011
8030	2011-11-02	2011
8032	2011-11-02	2011
8031	2011-11-02	2011
8034	2011-11-03	2011
8033	2011-11-03	2011
8036	2011-11-04	2011
8037	2011-11-04	2011
8035	2011-11-04	2011
8038	2011-11-05	2011
8040	2011-11-05	2011
8041	2011-11-05	2011
8039	2011-11-05	2011
8049	2011-11-06	2011
8045	2011-11-06	2011
8043	2011-11-06	2011
8044	2011-11-06	2011
8042	2011-11-06	2011
8046	2011-11-06	2011
8047	2011-11-06	2011
8048	2011-11-06	2011
8050	2011-11-07	2011
8051	2011-11-07	2011
8052	2011-11-07	2011
8055	2011-11-08	2011
8054	2011-11-08	2011
8057	2011-11-08	2011
8056	2011-11-08	2011
8059	2011-11-08	2011
8053	2011-11-08	2011
8058	2011-11-08	2011
8060	2011-11-09	2011
8061	2011-11-09	2011
8062	2011-11-09	2011
8063	2011-11-10	2011
8068	2011-11-10	2011
8067	2011-11-10	2011
8066	2011-11-10	2011
8064	2011-11-10	2011
8065	2011-11-10	2011
8073	2011-11-11	2011
8072	2011-11-11	2011
8071	2011-11-11	2011
8070	2011-11-11	2011
8069	2011-11-11	2011
8074	2011-11-11	2011
8077	2011-11-12	2011
8075	2011-11-12	2011
8076	2011-11-12	2011
8080	2011-11-12	2011
8079	2011-11-12	2011
8078	2011-11-12	2011
8082	2011-11-13	2011
8084	2011-11-13	2011
8083	2011-11-13	2011
8081	2011-11-13	2011
8095	2011-11-14	2011
8085	2011-11-14	2011
8087	2011-11-14	2011
8092	2011-11-14	2011
8091	2011-11-14	2011
8086	2011-11-14	2011
8090	2011-11-14	2011
8088	2011-11-14	2011
8093	2011-11-14	2011
8089	2011-11-14	2011
8094	2011-11-14	2011
8099	2011-11-15	2011
8098	2011-11-15	2011
8097	2011-11-15	2011
8096	2011-11-15	2011
8104	2011-11-15	2011
8103	2011-11-15	2011
8102	2011-11-15	2011
8101	2011-11-15	2011
8106	2011-11-15	2011
8105	2011-11-15	2011
8100	2011-11-15	2011
8109	2011-11-16	2011
8108	2011-11-16	2011
8110	2011-11-16	2011
8107	2011-11-16	2011
8111	2011-11-16	2011
8112	2011-11-17	2011
8116	2011-11-17	2011
8113	2011-11-17	2011
8114	2011-11-17	2011
8115	2011-11-17	2011
8117	2011-11-17	2011
8118	2011-11-18	2011
8120	2011-11-18	2011
8121	2011-11-18	2011
8122	2011-11-18	2011
8119	2011-11-18	2011
8124	2011-11-19	2011
8123	2011-11-19	2011
8125	2011-11-19	2011
8127	2011-11-20	2011
8126	2011-11-20	2011
8128	2011-11-20	2011
8129	2011-11-21	2011
8130	2011-11-21	2011
8131	2011-11-21	2011
8132	2011-11-22	2011
8133	2011-11-22	2011
8136	2011-11-22	2011
8138	2011-11-22	2011
8135	2011-11-22	2011
8137	2011-11-22	2011
8134	2011-11-22	2011
8140	2011-11-23	2011
8139	2011-11-23	2011
8142	2011-11-23	2011
8141	2011-11-23	2011
8144	2011-11-24	2011
8148	2011-11-24	2011
8147	2011-11-24	2011
8143	2011-11-24	2011
8146	2011-11-24	2011
8145	2011-11-24	2011
8149	2011-11-25	2011
8154	2011-11-26	2011
8152	2011-11-26	2011
8151	2011-11-26	2011
8153	2011-11-26	2011
8150	2011-11-26	2011
8158	2011-11-27	2011
8156	2011-11-27	2011
8157	2011-11-27	2011
8155	2011-11-27	2011
8159	2011-11-28	2011
8163	2011-11-28	2011
8161	2011-11-28	2011
8162	2011-11-28	2011
8164	2011-11-28	2011
8160	2011-11-28	2011
8169	2011-11-29	2011
8172	2011-11-29	2011
8167	2011-11-29	2011
8166	2011-11-29	2011
8165	2011-11-29	2011
8168	2011-11-29	2011
8170	2011-11-29	2011
8171	2011-11-29	2011
8177	2011-11-30	2011
8179	2011-11-30	2011
8178	2011-11-30	2011
8174	2011-11-30	2011
8173	2011-11-30	2011
8175	2011-11-30	2011
8176	2011-11-30	2011
8182	2011-12-01	2011
8183	2011-12-01	2011
8180	2011-12-01	2011
8181	2011-12-01	2011
8184	2011-12-01	2011
8185	2011-12-01	2011
8188	2011-12-02	2011
8187	2011-12-02	2011
8189	2011-12-02	2011
8186	2011-12-02	2011
8191	2011-12-03	2011
8190	2011-12-03	2011
8193	2011-12-04	2011
8192	2011-12-04	2011
8199	2011-12-05	2011
8198	2011-12-05	2011
8197	2011-12-05	2011
8195	2011-12-05	2011
8200	2011-12-05	2011
8194	2011-12-05	2011
8203	2011-12-05	2011
8204	2011-12-05	2011
8201	2011-12-05	2011
8202	2011-12-05	2011
8196	2011-12-05	2011
8205	2011-12-06	2011
8206	2011-12-06	2011
8211	2011-12-07	2011
8209	2011-12-07	2011
8210	2011-12-07	2011
8208	2011-12-07	2011
8207	2011-12-07	2011
8212	2011-12-07	2011
8213	2011-12-07	2011
8214	2011-12-08	2011
8217	2011-12-09	2011
8216	2011-12-09	2011
8215	2011-12-09	2011
8219	2011-12-10	2011
8218	2011-12-10	2011
8220	2011-12-11	2011
8221	2011-12-12	2011
8222	2011-12-12	2011
8226	2011-12-13	2011
8224	2011-12-13	2011
8225	2011-12-13	2011
8223	2011-12-13	2011
8227	2011-12-13	2011
8230	2011-12-14	2011
8228	2011-12-14	2011
8231	2011-12-14	2011
8229	2011-12-14	2011
8233	2011-12-15	2011
8232	2011-12-15	2011
8234	2011-12-15	2011
8235	2011-12-15	2011
8236	2011-12-15	2011
8238	2011-12-16	2011
8237	2011-12-16	2011
8239	2011-12-16	2011
8240	2011-12-17	2011
8242	2011-12-17	2011
8243	2011-12-17	2011
8241	2011-12-17	2011
8244	2011-12-18	2011
8245	2011-12-18	2011
8247	2011-12-18	2011
8246	2011-12-18	2011
8251	2011-12-19	2011
8250	2011-12-19	2011
8249	2011-12-19	2011
8248	2011-12-19	2011
8254	2011-12-19	2011
8252	2011-12-19	2011
8253	2011-12-19	2011
8268	2011-12-20	2011
8261	2011-12-20	2011
8267	2011-12-20	2011
8258	2011-12-20	2011
8269	2011-12-20	2011
8262	2011-12-20	2011
8259	2011-12-20	2011
8265	2011-12-20	2011
8257	2011-12-20	2011
8260	2011-12-20	2011
8263	2011-12-20	2011
8255	2011-12-20	2011
8264	2011-12-20	2011
8266	2011-12-20	2011
8256	2011-12-20	2011
8271	2011-12-21	2011
8274	2011-12-21	2011
8270	2011-12-21	2011
8272	2011-12-21	2011
8273	2011-12-21	2011
8275	2011-12-22	2011
8278	2011-12-23	2011
8281	2011-12-23	2011
8276	2011-12-23	2011
8277	2011-12-23	2011
8279	2011-12-23	2011
8280	2011-12-23	2011
8284	2011-12-24	2011
8287	2011-12-24	2011
8288	2011-12-24	2011
8283	2011-12-24	2011
8290	2011-12-24	2011
8282	2011-12-24	2011
8286	2011-12-24	2011
8289	2011-12-24	2011
8285	2011-12-24	2011
8292	2011-12-25	2011
8295	2011-12-25	2011
8294	2011-12-25	2011
8293	2011-12-25	2011
8291	2011-12-25	2011
8296	2011-12-26	2011
8298	2011-12-26	2011
8297	2011-12-26	2011
8299	2011-12-27	2011
8300	2011-12-27	2011
8301	2011-12-27	2011
8305	2011-12-28	2011
8304	2011-12-28	2011
8306	2011-12-28	2011
8302	2011-12-28	2011
8303	2011-12-28	2011
8307	2011-12-29	2011
8308	2011-12-30	2011
8309	2012-01-03	2012
8313	2012-01-04	2012
8312	2012-01-04	2012
8311	2012-01-04	2012
8310	2012-01-04	2012
8317	2012-01-05	2012
8318	2012-01-05	2012
8316	2012-01-05	2012
8315	2012-01-05	2012
8314	2012-01-05	2012
8319	2012-01-06	2012
8320	2012-01-06	2012
8322	2012-01-07	2012
8321	2012-01-07	2012
8323	2012-01-07	2012
8324	2012-01-07	2012
8325	2012-01-07	2012
8326	2012-01-07	2012
8330	2012-01-08	2012
8327	2012-01-08	2012
8328	2012-01-08	2012
8332	2012-01-08	2012
8329	2012-01-08	2012
8331	2012-01-08	2012
8337	2012-01-09	2012
8335	2012-01-09	2012
8336	2012-01-09	2012
8334	2012-01-09	2012
8333	2012-01-09	2012
8342	2012-01-10	2012
8338	2012-01-10	2012
8341	2012-01-10	2012
8340	2012-01-10	2012
8339	2012-01-10	2012
8343	2012-01-11	2012
8346	2012-01-11	2012
8349	2012-01-11	2012
8348	2012-01-11	2012
8345	2012-01-11	2012
8347	2012-01-11	2012
8344	2012-01-11	2012
8352	2012-01-12	2012
8351	2012-01-12	2012
8350	2012-01-12	2012
8353	2012-01-13	2012
8354	2012-01-13	2012
8356	2012-01-14	2012
8360	2012-01-14	2012
8359	2012-01-14	2012
8358	2012-01-14	2012
8355	2012-01-14	2012
8357	2012-01-14	2012
8361	2012-01-14	2012
8367	2012-01-15	2012
8362	2012-01-15	2012
8364	2012-01-15	2012
8368	2012-01-15	2012
8372	2012-01-15	2012
8374	2012-01-15	2012
8371	2012-01-15	2012
8373	2012-01-15	2012
8366	2012-01-15	2012
8365	2012-01-15	2012
8363	2012-01-15	2012
8370	2012-01-15	2012
8369	2012-01-15	2012
8377	2012-01-16	2012
8375	2012-01-16	2012
8376	2012-01-16	2012
8378	2012-01-16	2012
8383	2012-01-17	2012
8380	2012-01-17	2012
8379	2012-01-17	2012
8381	2012-01-17	2012
8382	2012-01-17	2012
8390	2012-01-18	2012
8385	2012-01-18	2012
8389	2012-01-18	2012
8384	2012-01-18	2012
8387	2012-01-18	2012
8388	2012-01-18	2012
8386	2012-01-18	2012
8393	2012-01-19	2012
8398	2012-01-19	2012
8392	2012-01-19	2012
8397	2012-01-19	2012
8391	2012-01-19	2012
8395	2012-01-19	2012
8396	2012-01-19	2012
8400	2012-01-20	2012
8399	2012-01-20	2012
8401	2012-01-20	2012
8408	2012-01-21	2012
8409	2012-01-21	2012
8405	2012-01-21	2012
8404	2012-01-21	2012
8407	2012-01-21	2012
8406	2012-01-21	2012
8402	2012-01-21	2012
8403	2012-01-21	2012
8410	2012-01-22	2012
8416	2012-01-22	2012
8415	2012-01-22	2012
8414	2012-01-22	2012
8413	2012-01-22	2012
8412	2012-01-22	2012
8417	2012-01-22	2012
8411	2012-01-22	2012
8418	2012-01-22	2012
8419	2012-01-22	2012
8423	2012-01-24	2012
8421	2012-01-24	2012
8420	2012-01-24	2012
8422	2012-01-24	2012
8426	2012-01-25	2012
8425	2012-01-25	2012
8424	2012-01-25	2012
8433	2012-01-25	2012
8432	2012-01-25	2012
8429	2012-01-25	2012
8430	2012-01-25	2012
8427	2012-01-25	2012
8431	2012-01-25	2012
8428	2012-01-25	2012
8434	2012-01-26	2012
8436	2012-01-26	2012
8435	2012-01-26	2012
8437	2012-01-26	2012
8438	2012-01-26	2012
8442	2012-01-27	2012
8441	2012-01-27	2012
8440	2012-01-27	2012
8439	2012-01-27	2012
8446	2012-01-28	2012
8445	2012-01-28	2012
8444	2012-01-28	2012
8447	2012-01-28	2012
8443	2012-01-28	2012
8448	2012-01-28	2012
8449	2012-01-28	2012
8454	2012-01-29	2012
8450	2012-01-29	2012
8451	2012-01-29	2012
8453	2012-01-29	2012
8455	2012-01-29	2012
8452	2012-01-29	2012
8457	2012-01-30	2012
8458	2012-01-30	2012
8456	2012-01-30	2012
8459	2012-01-30	2012
8460	2012-01-30	2012
8461	2012-01-31	2012
8462	2012-01-31	2012
8463	2012-01-31	2012
8466	2012-02-01	2012
8465	2012-02-01	2012
8464	2012-02-01	2012
8467	2012-02-01	2012
8468	2012-02-01	2012
8469	2012-02-01	2012
8471	2012-02-02	2012
8470	2012-02-02	2012
8472	2012-02-02	2012
8477	2012-02-03	2012
8474	2012-02-03	2012
8473	2012-02-03	2012
8476	2012-02-03	2012
8475	2012-02-03	2012
8478	2012-02-03	2012
8488	2012-02-04	2012
8481	2012-02-04	2012
8484	2012-02-04	2012
8483	2012-02-04	2012
8482	2012-02-04	2012
8479	2012-02-04	2012
8485	2012-02-04	2012
8486	2012-02-04	2012
8487	2012-02-04	2012
8480	2012-02-04	2012
8494	2012-02-05	2012
8489	2012-02-05	2012
8490	2012-02-05	2012
8492	2012-02-05	2012
8493	2012-02-05	2012
8491	2012-02-05	2012
8498	2012-02-06	2012
8501	2012-02-06	2012
8500	2012-02-06	2012
8496	2012-02-06	2012
8497	2012-02-06	2012
8495	2012-02-06	2012
8499	2012-02-06	2012
8502	2012-02-07	2012
8508	2012-02-07	2012
8506	2012-02-07	2012
8505	2012-02-07	2012
8509	2012-02-07	2012
8507	2012-02-07	2012
8504	2012-02-07	2012
8503	2012-02-07	2012
8519	2012-02-08	2012
8514	2012-02-08	2012
8513	2012-02-08	2012
8512	2012-02-08	2012
8511	2012-02-08	2012
8520	2012-02-08	2012
8516	2012-02-08	2012
8517	2012-02-08	2012
8515	2012-02-08	2012
8510	2012-02-08	2012
8518	2012-02-08	2012
8522	2012-02-09	2012
8525	2012-02-10	2012
8524	2012-02-10	2012
8523	2012-02-10	2012
8527	2012-02-11	2012
8526	2012-02-11	2012
8528	2012-02-11	2012
8529	2012-02-11	2012
8532	2012-02-12	2012
8535	2012-02-12	2012
8531	2012-02-12	2012
8530	2012-02-12	2012
8533	2012-02-12	2012
8534	2012-02-12	2012
8536	2012-02-12	2012
8537	2012-02-13	2012
8541	2012-02-13	2012
8540	2012-02-13	2012
8543	2012-02-13	2012
8538	2012-02-13	2012
8542	2012-02-13	2012
8539	2012-02-13	2012
8547	2012-02-14	2012
8546	2012-02-14	2012
8548	2012-02-14	2012
8544	2012-02-14	2012
8545	2012-02-14	2012
8552	2012-02-15	2012
8551	2012-02-15	2012
8550	2012-02-15	2012
8549	2012-02-15	2012
8553	2012-02-16	2012
8555	2012-02-16	2012
8554	2012-02-16	2012
8556	2012-02-17	2012
8557	2012-02-19	2012
8558	2012-02-19	2012
8559	2012-02-19	2012
8560	2012-02-20	2012
8562	2012-02-20	2012
8564	2012-02-20	2012
8565	2012-02-20	2012
8561	2012-02-20	2012
8563	2012-02-20	2012
8575	2012-02-21	2012
8570	2012-02-21	2012
8566	2012-02-21	2012
8573	2012-02-21	2012
8574	2012-02-21	2012
8567	2012-02-21	2012
8576	2012-02-21	2012
8571	2012-02-21	2012
8572	2012-02-21	2012
8569	2012-02-21	2012
8568	2012-02-21	2012
8577	2012-02-21	2012
8582	2012-02-22	2012
8581	2012-02-22	2012
8580	2012-02-22	2012
8578	2012-02-22	2012
8579	2012-02-22	2012
8585	2012-02-23	2012
8584	2012-02-23	2012
8583	2012-02-23	2012
8586	2012-02-23	2012
8591	2012-02-24	2012
8598	2012-02-24	2012
8592	2012-02-24	2012
8590	2012-02-24	2012
8588	2012-02-24	2012
8589	2012-02-24	2012
8594	2012-02-24	2012
8587	2012-02-24	2012
8596	2012-02-24	2012
8593	2012-02-24	2012
8597	2012-02-24	2012
8595	2012-02-24	2012
8599	2012-02-25	2012
8609	2012-02-25	2012
8603	2012-02-25	2012
8604	2012-02-25	2012
8602	2012-02-25	2012
8606	2012-02-25	2012
8600	2012-02-25	2012
8601	2012-02-25	2012
8605	2012-02-25	2012
8607	2012-02-25	2012
8608	2012-02-25	2012
8614	2012-02-26	2012
8610	2012-02-26	2012
8612	2012-02-26	2012
8615	2012-02-26	2012
8613	2012-02-26	2012
8611	2012-02-26	2012
8616	2012-02-27	2012
8621	2012-02-27	2012
8617	2012-02-27	2012
8622	2012-02-27	2012
8618	2012-02-27	2012
8620	2012-02-27	2012
8619	2012-02-27	2012
8627	2012-02-28	2012
8624	2012-02-28	2012
8625	2012-02-28	2012
8631	2012-02-28	2012
8626	2012-02-28	2012
8629	2012-02-28	2012
8628	2012-02-28	2012
8630	2012-02-28	2012
8623	2012-02-28	2012
8635	2012-02-29	2012
8632	2012-02-29	2012
8639	2012-02-29	2012
8636	2012-02-29	2012
8638	2012-02-29	2012
8634	2012-02-29	2012
8633	2012-02-29	2012
8637	2012-02-29	2012
8640	2012-02-29	2012
8642	2012-03-01	2012
8641	2012-03-01	2012
8647	2012-03-02	2012
8644	2012-03-02	2012
8643	2012-03-02	2012
8649	2012-03-02	2012
8648	2012-03-02	2012
8646	2012-03-02	2012
8645	2012-03-02	2012
8654	2012-03-03	2012
8653	2012-03-03	2012
8655	2012-03-03	2012
8657	2012-03-03	2012
8656	2012-03-03	2012
8652	2012-03-03	2012
8651	2012-03-03	2012
8650	2012-03-03	2012
8660	2012-03-04	2012
8658	2012-03-04	2012
8661	2012-03-04	2012
8662	2012-03-04	2012
8663	2012-03-04	2012
8659	2012-03-04	2012
8664	2012-03-04	2012
8669	2012-03-05	2012
8670	2012-03-05	2012
8666	2012-03-05	2012
8665	2012-03-05	2012
8667	2012-03-05	2012
8668	2012-03-05	2012
8671	2012-03-05	2012
8672	2012-03-06	2012
8675	2012-03-06	2012
8673	2012-03-06	2012
8674	2012-03-06	2012
8678	2012-03-07	2012
8677	2012-03-07	2012
8680	2012-03-07	2012
8681	2012-03-07	2012
8679	2012-03-07	2012
8676	2012-03-07	2012
8683	2012-03-07	2012
8682	2012-03-07	2012
8685	2012-03-08	2012
8684	2012-03-08	2012
8686	2012-03-08	2012
8688	2012-03-09	2012
8687	2012-03-09	2012
8695	2012-03-10	2012
8693	2012-03-10	2012
8696	2012-03-10	2012
8690	2012-03-10	2012
8697	2012-03-10	2012
8692	2012-03-10	2012
8689	2012-03-10	2012
8694	2012-03-10	2012
8691	2012-03-10	2012
8698	2012-03-10	2012
8701	2012-03-11	2012
8699	2012-03-11	2012
8700	2012-03-11	2012
8702	2012-03-11	2012
8703	2012-03-11	2012
8705	2012-03-12	2012
8704	2012-03-12	2012
8707	2012-03-12	2012
8709	2012-03-12	2012
8706	2012-03-12	2012
8708	2012-03-12	2012
8710	2012-03-13	2012
8711	2012-03-13	2012
8716	2012-03-14	2012
8713	2012-03-14	2012
8712	2012-03-14	2012
8714	2012-03-14	2012
8715	2012-03-14	2012
8717	2012-03-14	2012
8718	2012-03-15	2012
8720	2012-03-15	2012
8719	2012-03-15	2012
8726	2012-03-16	2012
8727	2012-03-16	2012
8724	2012-03-16	2012
8723	2012-03-16	2012
8722	2012-03-16	2012
8725	2012-03-16	2012
8721	2012-03-16	2012
8734	2012-03-17	2012
8732	2012-03-17	2012
8731	2012-03-17	2012
8729	2012-03-17	2012
8733	2012-03-17	2012
8730	2012-03-17	2012
8728	2012-03-17	2012
8735	2012-03-18	2012
8739	2012-03-19	2012
8738	2012-03-19	2012
8741	2012-03-19	2012
8737	2012-03-19	2012
8736	2012-03-19	2012
8740	2012-03-19	2012
8742	2012-03-20	2012
8746	2012-03-20	2012
8747	2012-03-20	2012
8748	2012-03-20	2012
8750	2012-03-20	2012
8743	2012-03-20	2012
8745	2012-03-20	2012
8744	2012-03-20	2012
8749	2012-03-20	2012
8752	2012-03-21	2012
8751	2012-03-21	2012
8756	2012-03-22	2012
8754	2012-03-22	2012
8757	2012-03-22	2012
8753	2012-03-22	2012
8755	2012-03-22	2012
8758	2012-03-22	2012
8762	2012-03-23	2012
8759	2012-03-23	2012
8760	2012-03-23	2012
8761	2012-03-23	2012
8764	2012-03-24	2012
8767	2012-03-24	2012
8766	2012-03-24	2012
8763	2012-03-24	2012
8765	2012-03-24	2012
8768	2012-03-24	2012
8769	2012-03-24	2012
8775	2012-03-25	2012
8776	2012-03-25	2012
8774	2012-03-25	2012
8778	2012-03-25	2012
8772	2012-03-25	2012
8771	2012-03-25	2012
8770	2012-03-25	2012
8773	2012-03-25	2012
8777	2012-03-25	2012
8779	2012-03-26	2012
8781	2012-03-26	2012
8783	2012-03-26	2012
8782	2012-03-26	2012
8780	2012-03-26	2012
8784	2012-04-01	2012
8785	2012-04-01	2012
8786	2012-04-01	2012
8788	2012-04-02	2012
8787	2012-04-02	2012
8789	2012-04-02	2012
8791	2012-04-02	2012
8790	2012-04-02	2012
8792	2012-04-03	2012
8793	2012-04-03	2012
8794	2012-04-04	2012
8796	2012-04-05	2012
8795	2012-04-05	2012
8797	2012-04-05	2012
8800	2012-04-06	2012
8799	2012-04-06	2012
8798	2012-04-06	2012
8801	2012-04-07	2012
8802	2012-04-08	2012
8804	2012-04-09	2012
8803	2012-04-09	2012
8805	2012-04-10	2012
8806	2012-04-10	2012
8809	2012-04-11	2012
8808	2012-04-11	2012
8807	2012-04-11	2012
8813	2012-04-12	2012
8810	2012-04-12	2012
8812	2012-04-12	2012
8811	2012-04-12	2012
28832	2012-04-12	2012
8815	2012-04-13	2012
8814	2012-04-13	2012
8816	2012-04-13	2012
8819	2012-04-14	2012
8818	2012-04-14	2012
8817	2012-04-14	2012
8820	2012-04-14	2012
8823	2012-04-15	2012
8824	2012-04-15	2012
8822	2012-04-15	2012
8821	2012-04-15	2012
8826	2012-04-16	2012
8825	2012-04-16	2012
8827	2012-04-16	2012
8830	2012-04-17	2012
8829	2012-04-17	2012
8828	2012-04-17	2012
8834	2012-04-18	2012
8832	2012-04-18	2012
8833	2012-04-18	2012
8831	2012-04-18	2012
8837	2012-04-19	2012
8836	2012-04-19	2012
8835	2012-04-19	2012
8840	2012-04-20	2012
8839	2012-04-20	2012
8838	2012-04-20	2012
8843	2012-04-21	2012
8841	2012-04-21	2012
8842	2012-04-21	2012
8844	2012-04-22	2012
8849	2012-04-23	2012
8846	2012-04-23	2012
8847	2012-04-23	2012
8845	2012-04-23	2012
8848	2012-04-23	2012
8851	2012-04-24	2012
8850	2012-04-24	2012
8852	2012-04-24	2012
8853	2012-04-24	2012
8855	2012-04-25	2012
8856	2012-04-25	2012
8854	2012-04-25	2012
8858	2012-04-26	2012
8859	2012-04-26	2012
8857	2012-04-26	2012
8861	2012-04-27	2012
8867	2012-04-27	2012
8862	2012-04-27	2012
8860	2012-04-27	2012
8869	2012-04-27	2012
8864	2012-04-27	2012
8865	2012-04-27	2012
8866	2012-04-27	2012
8863	2012-04-27	2012
8868	2012-04-27	2012
8870	2012-04-28	2012
8871	2012-04-28	2012
8872	2012-04-28	2012
8874	2012-04-29	2012
8875	2012-04-29	2012
8873	2012-04-29	2012
8877	2012-04-29	2012
8876	2012-04-29	2012
8881	2012-04-30	2012
8878	2012-04-30	2012
8880	2012-04-30	2012
8879	2012-04-30	2012
8883	2012-05-01	2012
8885	2012-05-01	2012
8886	2012-05-01	2012
8887	2012-05-01	2012
8882	2012-05-01	2012
8884	2012-05-01	2012
8888	2012-05-01	2012
8889	2012-05-02	2012
8891	2012-05-02	2012
8890	2012-05-02	2012
8892	2012-05-02	2012
8893	2012-05-02	2012
8902	2012-05-03	2012
8897	2012-05-03	2012
8898	2012-05-03	2012
8896	2012-05-03	2012
8901	2012-05-03	2012
8894	2012-05-03	2012
8895	2012-05-03	2012
8899	2012-05-03	2012
8900	2012-05-03	2012
8908	2012-05-04	2012
8905	2012-05-04	2012
8912	2012-05-04	2012
8910	2012-05-04	2012
8911	2012-05-04	2012
8906	2012-05-04	2012
8916	2012-05-04	2012
8913	2012-05-04	2012
8904	2012-05-04	2012
8909	2012-05-04	2012
8915	2012-05-04	2012
8914	2012-05-04	2012
8907	2012-05-04	2012
[truncated: 19,879 more rows]

## Sheet: ACLED_Conflict_012011_07_2019
data_id	iso	event_id_cnty	event_id_no_cnty	event_date	year	time_precision	event_type	sub_event_type	actor1	assoc_actor_1	inter1	interaction	region	country	admin1	admin2	admin3	location	latitude	longitude	geo_precision	source	source_scale	notes	fatalities	timestamp	iso3	Years (incl. Al Shabaab)	Conflict incl. Al Shabaab	Conflict excluding Al Shabaab	Fatalities incl. Al Shabaab
5547296	710	SOM28828	28828	2011-01-03	2011	1	Explosions/Remote violence	Remote explosive/landmine/IED	Unidentified Armed Group (Somalia)		3	37	Eastern Africa	Somalia	Mudug	Gaalkacyo		Gaalkacyo North	6.77	47.63	1	Aid Worker Security Database	Local	"A local staff of an INGO was injured when an RCIED exploded near a hotel, injuring 4 people. The attack was thought to be targeted at the Governor. The injured local staff was arrested under suspicion of involvement in the attack."	0	1562618545	ZAF	2011	553	1934	0
5547296	710	SOM28828	28828	2011-01-03	2011	1	Explosions/Remote violence	Remote explosive/landmine/IED	Civilians (Somalia)	Aid Workers (Somalia)	7	37	Eastern Africa	Somalia	Mudug	Gaalkacyo		Gaalkacyo North	6.77	47.63	1	Aid Worker Security Database	Local	"A local staff of an INGO was injured when an RCIED exploded near a hotel, injuring 4 people. The attack was thought to be targeted at the Governor. The injured local staff was arrested under suspicion of involvement in the attack."	0	1562618545	ZAF	2012	914	3143
5322082	706	SOM6904	6904	2011-01-05	2011	1	Violence against civilians	Attack	Unidentified Armed Group (Somalia)		3	37	Eastern Africa	Somalia	Mudug	Gaalkacyo		Gaalkacyo	6.7697	47.4308	1	Local Source	Local	An owner of a small clinic and a dealer in traditional medicines hailing from the Ogaden clan was murdered in Galkacyo South. Many local residents accused the Deputy Commander of Galmudug Police Cabdi Hasan Qoorey (Sacad/Faralle) of involvement in the killing. It is also believed that the leaflets threatening the Deputy Commander, that were distributed in Galkacyo South the night after the killin…	1	1561469335	SOM	2013	1079	4977
5322082	706	SOM6904	6904	2011-01-05	2011	1	Violence against civilians	Attack	Civilians (Somalia)		7	37	Eastern Africa	Somalia	Mudug	Gaalkacyo		Gaalkacyo	6.7697	47.4308	1	Local Source	Local	An owner of a small clinic and a dealer in traditional medicines hailing from the Ogaden clan was murdered in Galkacyo South. Many local residents accused the Deputy Commander of Galmudug Police Cabdi Hasan Qoorey (Sacad/Faralle) of involvement in the killing. It is also believed that the leaflets threatening the Deputy Commander, that were distributed in Galkacyo South the night after the killin…	1	1561469335	SOM	2014	1293	4405
5322081	706	SOM6903	6903	2011-01-05	2011	1	Protests	Peaceful protest	Protesters (Somalia)		6	60	Eastern Africa	Somalia	Mudug	Gaalkacyo		Gaalkacyo	6.7697	47.4308	1	Local Source	Local	A peaceful demonstration of about 200 people against insecurity in the town was organized in Galakacyo South. The demonstration was reported to have been organized in reaction to abduction of the Galmudug Minister of Education Burhan Cigal by pirates, motivated by his role in release of a child abducted by the pirates some time before.	0	1561469335	SOM	2015	1106	3448
4950641	706	SOM6906	6906	2011-01-20	2011	2	Strategic developments	Other	Private Security Forces (Somalia)		8	80	Eastern Africa	Somalia	Woqooyi Galbeed	Gebiley		Maroodi Jeeh	9.7	43.36	3	Crisis Watch	Other	Non-violent activity: Reports emerged 20 Jan that former leader of Xe Services, previously Blackwater private military company, involved in anti-terror and anti-piracy training of Puntland forces by Ugandan offshoot of South African company Saracen International.	0	1552577541	SOM	2016	1246	3908
5322083	706	SOM6905	6905	2011-01-20	2011	1	Protests	Peaceful protest	Protesters (Somalia)		6	60	Eastern Africa	Somalia	Togdheer	Buuhoodle		Buuhoodle	8.2516	46.3157	1	Local Source	Local	Citizens of Buuhoodle held a peaceful demonstration supporting the "Khatumo 2" meeting and the announcement of the Khatumo State. The demonstration was organized despite the opposition of the leader of the SSC to the results of the meeting. The	0	1561469335	SOM	2017	1718	4151
4950627	706	SOM6907	6907	2011-01-21	2011	1	Battles	Armed clash	Al Shabaab		2	12	Eastern Africa	Somalia	Banadir	Banadir		Mogadishu	2.0414	45.3337	1	Crisis Watch	Other	Fighting continued in Mogadishu between govt forces and Al Shabaab including 21-22 Jan clashes which left at least 3 dead, 6 injured.	2	1552577541	SOM	2018	1571	3918
4950627	706	SOM6907	6907	2011-01-21	2011	1	Battles	Armed clash	Military Forces of Somalia (2004-2012)		1	12	Eastern Africa	Somalia	Banadir	Banadir		Mogadishu	2.0414	45.3337	1	Crisis Watch	Other	Fighting continued in Mogadishu between govt forces and Al Shabaab including 21-22 Jan clashes which left at least 3 dead, 6 injured.	2	1552577541	SOM	2019	698	1972
4950593	706	SOM6908	6908	2011-01-22	2011	1	Battles	Armed clash	Al Shabaab		2	12	Eastern Africa	Somalia	Banadir	Banadir		Mogadishu	2.0414	45.3337	1	Crisis Watch	Other	Fighting continued in Mogadishu between govt forces and Al Shabaab including 21-22 Jan clashes which left at least 3 dead, 6 injured.	1	1552577541	SOM
4950593	706	SOM6908	6908	2011-01-22	2011	1	Battles	Armed clash	Military Forces of Somalia (2004-2012)		1	12	Eastern Africa	Somalia	Banadir	Banadir		Mogadishu	2.0414	45.3337	1	Crisis Watch	Other	Fighting continued in Mogadishu between govt forces and Al Shabaab including 21-22 Jan clashes which left at least 3 dead, 6 injured.	1	1552577541	SOM
4950217	706	SOM6909	6909	2011-01-31	2011	1	Battles	Armed clash	Unidentified Armed Group (Somalia)		3	13	Eastern Africa	Somalia	Banadir	Banadir		Mogadishu	2.0414	45.3337	1	Crisis Watch	Other	At least 12 killed, more than 30 injured as civilians caught in 31 Jan violence in Mogadishu; details unclear but Al Shabaab not implicated in initial reports.	12	1552577540	SOM
4950217	706	SOM6909	6909	2011-01-31	2011	1	Battles	Armed clash	Military Forces of Somalia (2004-2012)		1	13	Eastern Africa	Somalia	Banadir	Banadir		Mogadishu	2.0414	45.3337	1	Crisis Watch	Other	At least 12 killed, more than 30 injured as civilians caught in 31 Jan violence in Mogadishu; details unclear but Al Shabaab not implicated in initial reports.	12	1552577540	SOM
4949970	706	SOM6910	6910	2011-02-05	2011	1	Battles	Armed clash	Al Shabaab		2	12	Eastern Africa	Somalia	Banadir	Banadir		Mogadishu	2.0414	45.3337	3	Crisis Watch	Other	Intense fighting between govt-allied forces and militant Islamist Al Shabaab inflicting casualties on both sides, dozens of civilians killed, injured. Location of the event not known; both groups active in Mogadishu and southern Somalia.	12	1552577540	SOM
4949970	706	SOM6910	6910	2011-02-05	2011	1	Battles	Armed clash	Military Forces of Somalia (2004-2012)		1	12	Eastern Africa	Somalia	Banadir	Banadir		Mogadishu	2.0414	45.3337	3	Crisis Watch	Other	Intense fighting between govt-allied forces and militant Islamist Al Shabaab inflicting casualties on both sides, dozens of civilians killed, injured. Location of the event not known; both groups active in Mogadishu and southern Somalia.	12	1552577540	SOM
4949423	706	SOM6911	6911	2011-02-15	2011	1	Protests	Excessive force against protesters	Military Forces of Somalia (2004-2012)		1	16	Eastern Africa	Somalia	Banadir	Banadir		Mogadishu	2.0414	45.3337	2	Crisis Watch	Other	At least 5 reported killed, 10 wounded 15 Feb when govt forces opened fire on civilian crowd protesting against Al Shabaab. Location not known; likely in Mogadishu or southern Somalia.	5	1552577540	SOM
4949423	706	SOM6911	6911	2011-02-15	2011	1	Protests	Excessive force against protesters	Protesters (Somalia)		6	16	Eastern Africa	Somalia	Banadir	Banadir		Mogadishu	2.0414	45.3337	2	Crisis Watch	Other	At least 5 reported killed, 10 wounded 15 Feb when govt forces opened fire on civilian crowd protesting against Al Shabaab. Location not known; likely in Mogadishu or southern Somalia.	5	1552577540	SOM
4949269	706	SOM6912	6912	2011-02-19	2011	1	Battles	Armed clash	Al Shabaab		2	12	Eastern Africa	Somalia	Banadir	Banadir		Mogadishu	2.0414	45.3337	1	Crisis Watch	Other	Transitional Federal Govt (TFG) forces and AMISOM 19 Feb attacked Al Shabaab positions sparking 2 days intense fighting; at least 20 killed, dozens injured as stray mortars hit IDP camps.	20	1552577539	SOM
4949269	706	SOM6912	6912	2011-02-19	2011	1	Battles	Armed clash	Military Forces of Somalia (2004-2012)	AMISOM: African Union Mission in Somalia (2007-)	1	12	Eastern Africa	Somalia	Banadir	Banadir		Mogadishu	2.0414	45.3337	1	Crisis Watch	Other	Transitional Federal Govt (TFG) forces and AMISOM 19 Feb attacked Al Shabaab positions sparking 2 days intense fighting; at least 20 killed, dozens injured as stray mortars hit IDP camps.	20	1552577539	SOM
5322084	706	SOM6913	6913	2011-02-20	2011	1	Protests	Peaceful protest	Protesters (Somalia)	Women (Somalia)	6	60	Eastern Africa	Somalia	Nugaal	Garoowe		Garowe	8.4064	48.4819	1	Local Source	Local	A demonstration, composed for a big part of women and children, was organized in Garowe to support the position of the President of Puntland on the Buuhoodle conflict exposed the day before to the medias. Another demonstration had been organized the day before to protest against the perceived silence of the Puntland authorities about the conflict in Buuhoodle.	0	1561469335	SOM
4949137	706	SOM6917	6917	2011-02-21	2011	1	Explosions/Remote violence	Suicide bomb	Unidentified Armed Group (Somalia)		3	37	Eastern Africa	Somalia	Banadir	Banadir		Mogadishu	2.0414	45.3337	1	Crisis Watch	Other	A suicide car bomber 21 Feb killed at least 10 people near police training camp in Mogadishu.	10	1552577539	SOM
4949137	706	SOM6917	6917	2011-02-21	2011	1	Explosions/Remote violence	Suicide bomb	Civilians (Somalia)		7	37	Eastern Africa	Somalia	Banadir	Banadir		Mogadishu	2.0414	45.3337	1	Crisis Watch	Other	A suicide car bomber 21 Feb killed at least 10 people near police training camp in Mogadishu.	10	1552577539	SOM
5322085	706	SOM6914	6914	2011-02-21	2011	1	Strategic developments	Change to group/activity	Military Forces of Somalia (2004-2012) Puntland Security Force		1	10	Eastern Africa	Somalia	Sool	Laas Caanood		Tuko Raq	8.5673	47.6438	2	Local Source	Local	Movement of forces: An unknown number of Puntland forces are reported to have been deployed in Tuka-Raq, 25km east of Somaliland forces that are based in Gambadha. This mobilization intervened the day after President Faroole of Puntland condemned Somaliland intervention against the SSC in Buuhoodle and warned about a direct involvement of Puntland in the conflict.	0	1561469335	SOM
5322087	706	SOM6916	6916	2011-02-21	2011	1	Riots	Violent demonstration	Rioters (Somalia)	Women (Somalia)	5	50	Eastern Africa	Somalia	Banadir	Banadir		Shangaani	2.0377	45.35	1	Local Source	Local	Violent demonstrations, composed mostly of women and children, were held in Shangani District close to Mohamed Dheeres residence and moved in the direction of Villa Somalia in Wardhigley District. Demonstrators were calling for the release of Mohamed Dheere. Hundreds of protesters set tires alight and blocked the roads. One minibus was burnt. Presidential forces opened fire to disperse the crowd …	0	1561469335	SOM
5322086	706	SOM6915	6915	2011-02-21	2011	1	Protests	Peaceful protest	Protesters (Somalia)	Women (Somalia)	6	60	Eastern Africa	Somalia	Nugaal	Garoowe		Garowe	8.4064	48.4819	1	Local Source	Local	A demonstration, composed for a big part of women and children, was organized in Garowe to support the position of the President of Puntland on the Buuhoodle conflict exposed the day before to the medias. Another demonstration had been organized the day before to protest against the perceived silence of the Puntland authorities about the conflict in Buuhoodle.	0	1561469335	SOM
5322091	706	SOM6921	6921	2011-02-22	2011	1	Explosions/Remote violence	Shelling/artillery/missile attack	Unidentified Armed Group (Somalia)		3	37	Eastern Africa	Somalia	Banadir	Banadir		Waaberi	2.0195	45.31	1	Local Source	Local	A mortar round fired from an unknown location fell in the above mentioned area and reportedly killed 7 persons.	7	1561469335	SOM
5322091	706	SOM6921	6921	2011-02-22	2011	1	Explosions/Remote violence	Shelling/artillery/missile attack	Civilians (Somalia)		7	37	Eastern Africa	Somalia	Banadir	Banadir		Waaberi	2.0195	45.31	1	Local Source	Local	A mortar round fired from an unknown location fell in the above mentioned area and reportedly killed 7 persons.	7	1561469335	SOM
5322090	706	SOM6920	6920	2011-02-22	2011	1	Violence against civilians	Attack	Pirates (Somalia)		3	37	Eastern Africa	Somalia	Mudug	Hobyo		Hobyo	5.3505	48.5268	1	Local Source	Local	The 4 American citizens that had been captured onboard their yacht by Somali pirates on 18/02/2011 are reported to have been killed before or during a rescue operation organized by US forces that was launched on 22/02/2011 at 01.00. US officials disclosed that the hostages had been killed before the assault was launched and that their bodies were found on their boat by the rescuers. According to …	6	1561469335	SOM
5322090	706	SOM6920	6920	2011-02-22	2011	1	Violence against civilians	Attack	Civilians (International)		7	37	Eastern Africa	Somalia	Mudug	Hobyo		Hobyo	5.3505	48.5268	1	Local Source	Local	The 4 American citizens that had been captured onboard their yacht by Somali pirates on 18/02/2011 are reported to have been killed before or during a rescue operation organized by US forces that was launched on 22/02/2011 at 01.00. US officials disclosed that the hostages had been killed before the assault was launched and that their bodies were found on their boat by the rescuers. According to …	6	1561469335	SOM
5322088	706	SOM6918	6918	2011-02-22	2011	1	Protests	Peaceful protest	Protesters (Somalia)		6	60	Eastern Africa	Somalia	Woqooyi Galbeed	Hargeysa		Hargeysa	9.5598	44.0668	1	Local Source	Local	Local residents held a demonstration and blocked a main road with stones and tires to complain about the absence of response from the Somaliland authorities after the destruction by fire of 7 houses by armed gangs. The Police Commissioner explained that the Police had arrested 8 suspects in connection to the arsons. A local leader encouraged Gacan Libaah residents to establish community police. N…	0	1561469335	SOM
5322089	706	SOM6919	6919	2011-02-22	2011	1	Strategic developments	Change to group/activity	Military Forces of Ethiopia (1995-2018)		8	80	Eastern Africa	Somalia	Gedo	Doolow		Doolow	4.1642	42.0794	1	Local Source	Local	Movement of forces: Somali pro-TFG militias and ENDF forces that had remained in Dollow/Ethiopia in the last days are reported to have crossed to Dollow/Somalia in the end of the afternoon. Deployment of a combined force of around 900 men has also been reported in Suftu/Ethiopia. Persistent rumors coming from the area indicate that the offensives towards Luuq/Baidoa from Dollow and towards Belet …	0	1561469335	SOM
5322101	706	SOM6931	6931	2011-02-23	2011	2	Battles	Armed clash	Al Shabaab		2	23	Eastern Africa	Somalia	Hiraan	Belet Weyne		Belet Weyne	4.736	45.2043	1	Local Source	Local	After having clashed with AS forces close to Belet Weyne airport forces of the Shabelle Valley State (SVS) withdrew back to Ceel Gaal. ENDF troops that had been supporting them moved back further north to Kalabeyr.	0	1561469335	SOM
5322099	706	SOM6929	6929	2011-02-23	2011	1	Battles	Armed clash	Al Shabaab		2	12	Eastern Africa	Somalia	Hiraan	Belet Weyne		Belet Weyne	4.736	45.2043	1	Local Source	Local	Fighting broke out between AS forces and pro-TFG militias supported by ENDF in the vicinity of Belet Weyne in the night of 22-23 February. The AS reportedly launched a preemptive offensive against pro-TFG forces and clashes extended during most of the day. Unconfirmed reports indicate that ENDF may have crossed into Somalia on the western side of the Shabelle River. Exchange of artillery fire has…	0	1561469335	SOM
5322098	706	SOM6928	6928	2011-02-23	2011	1	Battles	Government regains territory	Al Shabaab		2	12	Eastern Africa	Somalia	Togdheer	Owdweyne		Ood Weyne	9.407	45.0636	1	Local Source	Local	AMISOM and TFG forces launched an offensive against AS positions at the above mentioned locations at 04.00. AMISOM reportedly took control of all these locations but heavy fighting was reported during most of the day with AS reinforcements coming from Lower Shabelle. Both sides claimed victory	0	1561469335	SOM
5322097	706	SOM6927	6927	2011-02-23	2011	1	Battles	Government regains territory	Al Shabaab		2	12	Eastern Africa	Somalia	Banadir	Banadir		Cabdicasiis	2.07	45.37	2	Local Source	Local	AMISOM and TFG forces launched an offensive against AS positions at the above mentioned locations at 04.00. AMISOM reportedly took control of all these locations but heavy fighting was reported during most of the day with AS reinforcements coming from Lower Shabelle. Both sides claimed victory	0	1561469335	SOM
5322094	706	SOM6924	6924	2011-02-23	2011	1	Battles	Armed clash	Al Shabaab		2	12	Eastern Africa	Somalia	Banadir	Banadir		Dharkenley	2.0095	45.25	1	Local Source	Local	Two young men armed with pistols suspected of being AS were shot and killed by TFG forces. The two men were buried in the area without being identified.	2	1561469335	SOM
5322100	706	SOM6930	6930	2011-02-23	2011	1	Battles	Armed clash	Al Shabaab		2	23	Eastern Africa	Somalia	Gedo	Belet Xaawo		Belet Xaawo	3.7807	41.8943	1	Local Source	Local	Forces composed of Ethiopian military, militias loyal to Barre Hirale and ASWJ launched a combined offensive against AS in Belet-Xawo from Sufta/Ethiopia. The confrontation started at around 11.45 and lasted up to the end of the afternoon. Heavy fighting and shelling was reported in the north of Belet-Xawo with AS apparently opposing a strong resistance. 3 mortars have reportedly landed in Mander…	0	1561469335	SOM
5322096	706	SOM6926	6926	2011-02-23	2011	1	Battles	Armed clash	Al Shabaab		2	12	Eastern Africa	Somalia	Gedo	Luuq		Luuq	3.8	42.5446	1	Local Source	Local	An offensive was launched by ex-TFG militia supported by ENDF from Dollow towards Luuq/Gedo Region. Luuq was also reported to be still under the control of AS in the evening of 23 February.	0	1561469335	SOM
5322101	706	SOM6931	6931	2011-02-23	2011	2	Battles	Armed clash	SVS: Shabelle Valley State Forces		3	23	Eastern Africa	Somalia	Hiraan	Belet Weyne		Belet Weyne	4.736	45.2043	1	Local Source	Local	After having clashed with AS forces close to Belet Weyne airport forces of the Shabelle Valley State (SVS) withdrew back to Ceel Gaal. ENDF troops that had been supporting them moved back further north to Kalabeyr.	0	1561469335	SOM
5322099	706	SOM6929	6929	2011-02-23	2011	1	Battles	Armed clash	Military Forces of Somalia (2004-2012)	Military Forces of Ethiopia (1995-2018)	1	12	Eastern Africa	Somalia	Hiraan	Belet Weyne		Belet Weyne	4.736	45.2043	1	Local Source	Local	Fighting broke out between AS forces and pro-TFG militias supported by ENDF in the vicinity of Belet Weyne in the night of 22-23 February. The AS reportedly launched a preemptive offensive against pro-TFG forces and clashes extended during most of the day. Unconfirmed reports indicate that ENDF may have crossed into Somalia on the western side of the Shabelle River. Exchange of artillery fire has…	0	1561469335	SOM	*until 15/07/2019
5322098	706	SOM6928	6928	2011-02-23	2011	1	Battles	Government regains territory	Military Forces of Somalia (2004-2012)	AMISOM: African Union Mission in Somalia (2007-)	1	12	Eastern Africa	Somalia	Togdheer	Owdweyne		Ood Weyne	9.407	45.0636	1	Local Source	Local	AMISOM and TFG forces launched an offensive against AS positions at the above mentioned locations at 04.00. AMISOM reportedly took control of all these locations but heavy fighting was reported during most of the day with AS reinforcements coming from Lower Shabelle. Both sides claimed victory	0	1561469335	SOM
5322097	706	SOM6927	6927	2011-02-23	2011	1	Battles	Government regains territory	Military Forces of Somalia (2004-2012)	AMISOM: African Union Mission in Somalia (2007-)	1	12	Eastern Africa	Somalia	Banadir	Banadir		Cabdicasiis	2.07	45.37	2	Local Source	Local	AMISOM and TFG forces launched an offensive against AS positions at the above mentioned locations at 04.00. AMISOM reportedly took control of all these locations but heavy fighting was reported during most of the day with AS reinforcements coming from Lower Shabelle. Both sides claimed victory	0	1561469335	SOM
5322093	706	SOM6923	6923	2011-02-23	2011	1	Strategic developments	Change to group/activity	Unidentified Armed Group (Somalia)		3	30	Eastern Africa	Somalia	Gedo	Ceel Waaq		El Wak	2.7352	41.0177	1	Local Source	Local	Movement of forces: Reports indicate that Somali militias previously trained in Kenya crossed from Ceel-Waaq/Kenya to Ceel-Waaq/Somalia on 23 and 24/02 but did not engage with AS militias based in Ceel-Waaq/Somalia. They are reported to have moved back inside Kenya. Tension remains high.	0	1561469335	SOM
4949060	706	SOM6932	6932	2011-02-23	2011	1	Battles	Armed clash	Unidentified Armed Group (Somalia)		3	38	Eastern Africa	Somalia	Banadir	Banadir		Mogadishu	2.0414	45.3337	1	Crisis Watch	Other	6 AMISOM troops killed, 12 wounded in 23 Feb fighting in Mogadishu.	6	1552577539	SOM
4949060	706	SOM6932	6932	2011-02-23	2011	1	Battles	Armed clash	AMISOM: African Union Mission in Somalia (2007-)		8	38	Eastern Africa	Somalia	Banadir	Banadir		Mogadishu	2.0414	45.3337	1	Crisis Watch	Other	6 AMISOM troops killed, 12 wounded in 23 Feb fighting in Mogadishu.	6	1552577539	SOM
5322095	706	SOM6925	6925	2011-02-23	2011	1	Battles	Armed clash	SSC: Sool, Sanaag and Cayn Militia		3	13	Eastern Africa	Somalia	Togdheer	Buuhoodle		Buuhoodle	8.2516	46.3157	1	Local Source	Local	SSC militia are reported to have attacked the Somaliland base in Kalshaale with artillery fire. 1 Somaliland soldier was reportedly killed.	1	1561469335	SOM
5322095	706	SOM6925	6925	2011-02-23	2011	1	Battles	Armed clash	Military Forces of Somaliland (2010-)		1	13	Eastern Africa	Somalia	Togdheer	Buuhoodle		Buuhoodle	8.2516	46.3157	1	Local Source	Local	SSC militia are reported to have attacked the Somaliland base in Kalshaale with artillery fire. 1 Somaliland soldier was reportedly killed.	1	1561469335	SOM
5322094	706	SOM6924	6924	2011-02-23	2011	1	Battles	Armed clash	Military Forces of Somalia (2004-2012)		1	12	Eastern Africa	Somalia	Banadir	Banadir		Dharkenley	2.0095	45.25	1	Local Source	Local	Two young men armed with pistols suspected of being AS were shot and killed by TFG forces. The two men were buried in the area without being identified.	2	1561469335	SOM
5322100	706	SOM6930	6930	2011-02-23	2011	1	Battles	Armed clash	ASWJ: Ahlu Sunna Wal Jamaa		3	23	Eastern Africa	Somalia	Gedo	Belet Xaawo		Belet Xaawo	3.7807	41.8943	1	Local Source	Local	Forces composed of Ethiopian military, militias loyal to Barre Hirale and ASWJ launched a combined offensive against AS in Belet-Xawo from Sufta/Ethiopia. The confrontation started at around 11.45 and lasted up to the end of the afternoon. Heavy fighting and shelling was reported in the north of Belet-Xawo with AS apparently opposing a strong resistance. 3 mortars have reportedly landed in Mander…	0	1561469335	SOM
5322092	706	SOM6922	6922	2011-02-23	2011	2	Strategic developments	Other	Pirates (Somalia)		3	30	Eastern Africa	Somalia	Mudug	Xarardheere		Xarardheere	4.6517	47.8584	1	Local Source	Local	Non-violent activity: Somali pirates based in the town of Xarar-Dheere agreed to pay twenty percent of all future ransoms to AS after AS released several pirate leaders who had been arrested last week. AS had threatened to dislodge pirates from that area if they refused to comply with the taxation order.	0	1561469335	SOM
5322096	706	SOM6926	6926	2011-02-23	2011	1	Battles	Armed clash	Former Military Forces of Somalia (2004-2012)	Military Forces of Ethiopia (1995-2018)	1	12	Eastern Africa	Somalia	Gedo	Luuq		Luuq	3.8	42.5446	1	Local Source	Local	An offensive was launched by ex-TFG militia supported by ENDF from Dollow towards Luuq/Gedo Region. Luuq was also reported to be still under the control of AS in the evening of 23 February.	0	1561469335	SOM
5322110	706	SOM6942	6942	2011-02-24	2011	1	Battles	Armed clash	Al Shabaab		2	28	Eastern Africa	Somalia	Banadir	Banadir		Daynile	2.0581	45.3003	1	Local Source	Local	Heavy fighting continued in Mogadishu around the ex-Ministry of Defence and in Talex and Shaqalaha areas in Hodan District on 23 and 24/10. AMISOM forces remained in control of the building that had been captured on 23/02 despite at least 3 AS offensives starting at 03.00 in the night of 23-24/02. AMISOM defences in that location have been reinforced throughout the day. Artillery fire from the AM…	0	1561469335	SOM
5322103	706	SOM6934	6934	2011-02-24	2011	1	Strategic developments	Change to group/activity	Al Shabaab		2	20	Eastern Africa	Somalia	Gedo	Luuq		Luuq	3.8	42.5446	2	Local Source	Local	Movement of forces: Al Shabaab are reported to have concentrated a significant number of forces between Waajid and Luuq, around 40km east of Luuq. The prospect of an offensive in Bakool Region of ex-TFG militias that are usually based in Yeed is relatively low due to the fact that these militias are reported to have joined with the militias based in Dollow and are already part of the offensive th…	0	1561469335	SOM
5322111	706	SOM6943	6943	2011-02-24	2011	1	Violence against civilians	Abduction/forced disappearance	Pirates (Somalia)		3	37	Eastern Africa	Somalia	Nugaal	Garoowe		Garowe	8.4064	48.4819	3	Local Source	Local	Three Danish youths (12-16 years old) and their parents were kidnapped by Somali pirates on Thursday. The Danish Foreign MinisterLene Espersen consequently announced the Danish government would do everything in its power to help the hostages.	0	1561469335	SOM
5322111	706	SOM6943	6943	2011-02-24	2011	1	Violence against civilians	Abduction/forced disappearance	Civilians (International)		7	37	Eastern Africa	Somalia	Nugaal	Garoowe		Garowe	8.4064	48.4819	3	Local Source	Local	Three Danish youths (12-16 years old) and their parents were kidnapped by Somali pirates on Thursday. The Danish Foreign MinisterLene Espersen consequently announced the Danish government would do everything in its power to help the hostages.	0	1561469335	SOM
5322105	706	SOM6936	6936	2011-02-24	2011	1	Strategic developments	Change to group/activity	Unidentified Armed Group (Somalia)		3	30	Eastern Africa	Somalia	Gedo	Ceel Waaq		El Wak	2.7352	41.0177	1	Local Source	Local	Movement of forces: Reports indicate that Somali militias previously trained in Kenya crossed from Ceel-Waaq/Kenya to Ceel-Waaq/Somalia on 23 and 24/02 but did not engage with AS militias based in Ceel-Waaq/Somalia. They are reported to have moved back inside Kenya. Tension remains high.	0	1561469335	SOM
5322104	706	SOM6935	6935	2011-02-24	2011	1	Strategic developments	Change to group/activity	ASWJ: Ahlu Sunna Wal Jamaa		3	30	Eastern Africa	Somalia	Galgaduud	Dhuusamarreeb		Dhuusamarreeb	5.5376	46.3867	1	Local Source	Local	Movement of forces: Reports indicate that around 200 heavily armed ASWJ militia have established defensive positions approximately 5km east of Dhusamareb.	0	1561469335	SOM
4948982	706	SOM6941	6941	2011-02-24	2011	1	Battles	Armed clash	Unidentified Armed Group (Somalia)		3	13	Eastern Africa	Somalia	Lower Juba	Kismaayo		Kismayo	-0.3603	42.5463	3	Crisis Watch	Other	AMISOM, TFG and allied groups 24 Feb launched coordinated attack in Mogadishu and along Ethiopian, Kenyan border; Ethiopian troops reportedly involved in fighting, Kenya closed border.	0	1552577539	SOM
4948982	706	SOM6941	6941	2011-02-24	2011	1	Battles	Armed clash	Military Forces of Somalia (2004-2012)	AMISOM: African Union Mission in Somalia (2007-)	1	13	Eastern Africa	Somalia	Lower Juba	Kismaayo		Kismayo	-0.3603	42.5463	3	Crisis Watch	Other	AMISOM, TFG and allied groups 24 Feb launched coordinated attack in Mogadishu and along Ethiopian, Kenyan border; Ethiopian troops reportedly involved in fighting, Kenya closed border.	0	1552577539	SOM
5322110	706	SOM6942	6942	2011-02-24	2011	1	Battles	Armed clash	AMISOM: African Union Mission in Somalia (2007-)		8	28	Eastern Africa	Somalia	Banadir	Banadir		Daynile	2.0581	45.3003	1	Local Source	Local	Heavy fighting continued in Mogadishu around the ex-Ministry of Defence and in Talex and Shaqalaha areas in Hodan District on 23 and 24/10. AMISOM forces remained in control of the building that had been captured on 23/02 despite at least 3 AS offensives starting at 03.00 in the night of 23-24/02. AMISOM defences in that location have been reinforced throughout the day. Artillery fire from the AM…	0	1561469335	SOM
5322102	706	SOM6933	6933	2011-02-24	2011	1	Strategic developments	Change to group/activity	Former Military Forces of Somalia (2004-2012)		1	10	Eastern Africa	Somalia	Gedo	Doolow		Geedweyne	4.0304	42.294	1	Local Source	Local	Ex-TFG militias that had started moving towards Luuq on 23/02 were reportedly instructed to hold their advance and remain in Geedweyne, around 40km before Luuq. No fighting took place in Luuq between 23 and 24/02. AS remains in control of that location.	0	1561469335	SOM
5322109	706	SOM6940	6940	2011-02-24	2011	1	Strategic developments	Change to group/activity	Military Forces of Ethiopia (1995-2018)		8	80	Eastern Africa	Somalia	Hiraan	Belet Weyne		Kalabeyr	4.9263	45.2172	1	Local Source	Local	Movement of forces: Fresh ENDF troops with tanks were deployed on 24/02 in Kalabeyr.	0	1561469335	SOM
5322108	706	SOM6939	6939	2011-02-24	2011	1	Protests	Peaceful protest	Protesters (Somalia)	Women (Somalia)	6	60	Eastern Africa	Somalia	Nugaal	Garoowe		Garowe	8.4064	48.4819	1	Local Source	Local	Demonstrations led primarily by women were organized to protest against the intervention of SL in Buuhoodle and surrounding areas. The demonstrations called upon SL leadership to stop the violence and withdraw its forces from the disputed areas.	0	1561469335	SOM
5322107	706	SOM6938	6938	2011-02-24	2011	1	Protests	Peaceful protest	Protesters (Somalia)	Women (Somalia)	6	60	Eastern Africa	Somalia	Mudug	Gaalkacyo		Gaalkacyo	6.7697	47.4308	1	Local Source	Local	Demonstrations led primarily by women were organized to protest against the intervention of SL in Buuhoodle and surrounding areas. The demonstrations called upon SL leadership to stop the violence and withdraw its forces from the disputed areas.	0	1561469335	SOM
5322106	706	SOM6937	6937	2011-02-24	2011	1	Protests	Peaceful protest	Protesters (Somalia)	Women (Somalia)	6	60	Eastern Africa	Somalia	Bari	Bossaso		Bosaso	11.2842	49.1816	1	Local Source	Local	Demonstrations led primarily by women were organized to protest against the intervention of SL in Buuhoodle and surrounding areas. The demonstrations called upon SL leadership to stop the violence and withdraw its forces from the disputed areas.	0	1561469335	SOM
5322115	706	SOM6947	6947	2011-02-25	2011	1	Battles	Non-state actor overtakes territory	Al Shabaab		2	28	Eastern Africa	Somalia	Banadir	Banadir		Mogadishu	2.0414	45.3337	1	Local Source	Local	AMISOM and TFG forces continued their offensive against AS positions in these two districts. AMISOM/TFG captured in the morning several key areas such as Florence, Sinai Junction and parts of Aden Adde Road encountering strong resistance. AMISOM/TFG forces abandoned at least some of these positions in the end of the afternoon. Unconfirmed reports establish that 19 people were killed and 29 injure…	9	1561469335	SOM
5322114	706	SOM6946	6946	2011-02-25	2011	1	Battles	Government regains territory	Al Shabaab		2	28	Eastern Africa	Somalia	Banadir	Banadir		Mogadishu	2.0414	45.3337	1	Local Source	Local	AMISOM and TFG forces continued their offensive against AS positions in these two districts. AMISOM/TFG captured in the morning several key areas such as Florence, Sinai Junction and parts of Aden Adde Road encountering strong resistance. AMISOM/TFG forces abandoned at least some of these positions in the end of the afternoon. Unconfirmed reports establish that 19 people were killed and 29 injure…	10	1561469335	SOM
5322116	706	SOM6948	6948	2011-02-25	2011	1	Battles	Armed clash	Al Shabaab		2	23	Eastern Africa	Somalia	Gedo	Doolow		Bula Hawa	3.9276	41.8742	1	Local Source	Local	After an artillery preparation that lasted from 09.30 to 10.30 heavy clashes involved Somali militias and AS forces in Bulo-Xawo/Mandera throughout most of the day.Kenyan forces (military and air force) in the whole region were placed on high alert. Despite heavy artillery support from Ethiopia the militias opposing AS did not manage to take control of Bulo-Xawo and moved back to their original p…	0	1561469335	SOM
5322115	706	SOM6947	6947	2011-02-25	2011	1	Battles	Non-state actor overtakes territory	AMISOM: African Union Mission in Somalia (2007-)	Military Forces of Somalia (2004-2012)	8	28	Eastern Africa	Somalia	Banadir	Banadir		Mogadishu	2.0414	45.3337	1	Local Source	Local	AMISOM and TFG forces continued their offensive against AS positions in these two districts. AMISOM/TFG captured in the morning several key areas such as Florence, Sinai Junction and parts of Aden Adde Road encountering strong resistance. AMISOM/TFG forces abandoned at least some of these positions in the end of the afternoon. Unconfirmed reports establish that 19 people were killed and 29 injure…	9	1561469335	SOM
5322113	706	SOM6945	6945	2011-02-25	2011	1	Protests	Peaceful protest	Protesters (Somalia)		6	60	Eastern Africa	Somalia	Woqooyi Galbeed	Hargeysa		Hargeysa	9.5598	44.0668	1	Local Source	Local	Residents of the above mentioned areas protested against Interior Ministers speech whom they accused of downplaying the seriousness of the recent fires in the area and criticized the government for insufficient response.	0	1561469335	SOM
5322114	706	SOM6946	6946	2011-02-25	2011	1	Battles	Government regains territory	AMISOM: African Union Mission in Somalia (2007-)	Military Forces of Somalia (2004-2012)	8	28	Eastern Africa	Somalia	Banadir	Banadir		Mogadishu	2.0414	45.3337	1	Local Source	Local	AMISOM and TFG forces continued their offensive against AS positions in these two districts. AMISOM/TFG captured in the morning several key areas such as Florence, Sinai Junction and parts of Aden Adde Road encountering strong resistance. AMISOM/TFG forces abandoned at least some of these positions in the end of the afternoon. Unconfirmed reports establish that 19 people were killed and 29 injure…	10	1561469335	SOM
5322116	706	SOM6948	6948	2011-02-25	2011	1	Battles	Armed clash	Unidentified Armed Group (Somalia)		3	23	Eastern Africa	Somalia	Gedo	Doolow		Bula Hawa	3.9276	41.8742	1	Local Source	Local	After an artillery preparation that lasted from 09.30 to 10.30 heavy clashes involved Somali militias and AS forces in Bulo-Xawo/Mandera throughout most of the day.Kenyan forces (military and air force) in the whole region were placed on high alert. Despite heavy artillery support from Ethiopia the militias opposing AS did not manage to take control of Bulo-Xawo and moved back to their original p…	0	1561469335	SOM
5322112	706	SOM6944	6944	2011-02-25	2011	1	Strategic developments	Change to group/activity	Military Forces of Somalia (2004-2012) Puntland Security Force		1	10	Eastern Africa	Somalia	Sool	Laas Caanood		Laascaanood	8.4774	47.3597	1	Local Source	Local	Movement of forces: The Puntland Security Forces moved out of Tukaraq, probably back to Puntland.	0	1561469335	SOM
5322119	706	SOM6951	6951	2011-02-26	2011	1	Battles	Government regains territory	Al Shabaab		2	28	Eastern Africa	Somalia	Banadir	Banadir		Daynile	2.0581	45.3003	1	Local Source	Local	Sporadic clashes opposed AS and AMISOM forces around the ex-Ministry of Defense. AS were not able to retake the positions lost after 23/02.	0	1561469335	SOM
5322118	706	SOM6950	6950	2011-02-26	2011	1	Explosions/Remote violence	Remote explosive/landmine/IED	Al Shabaab		2	12	Eastern Africa	Somalia	Banadir	Banadir		Mogadishu	2.0414	45.3337	1	Local Source	Local	RCIED targeting a TFG mini-bus exploded along Ali Boley road. The device was detonated after the bus had passed and missed its target. 1 civilian was however killed and 2 wounded.	1	1561469335	SOM
5322120	706	SOM6952	6952	2011-02-26	2011	1	Battles	Armed clash	Al Shabaab		2	28	Eastern Africa	Somalia	Banadir	Banadir		Wardhigley	2.0549	45.33	1	Local Source	Local	Exchange of artillery fire between AMISOM and AS-held areas was reported in the morning. One of the rounds reportedly landed in a residential area killing 1 civilian and injuring 6 others.	1	1561469335	SOM
5322119	706	SOM6951	6951	2011-02-26	2011	1	Battles	Government regains territory	AMISOM: African Union Mission in Somalia (2007-)		8	28	Eastern Africa	Somalia	Banadir	Banadir		Daynile	2.0581	45.3003	1	Local Source	Local	Sporadic clashes opposed AS and AMISOM forces around the ex-Ministry of Defense. AS were not able to retake the positions lost after 23/02.	0	1561469335	SOM
5322117	706	SOM6949	6949	2011-02-26	2011	1	Protests	Peaceful protest	Protesters (Somalia)		6	60	Eastern Africa	Somalia	Lower Shabelle	Afgooye		Madiina	2.2204	45.2259	1	Local Source	Local	Hundreds of people supporting the TFG gathered at the above mentioned area in order to express their support to recent TFG and AMISOM offensives against AS bases.	0	1561469335	SOM
5322118	706	SOM6950	6950	2011-02-26	2011	1	Explosions/Remote violence	Remote explosive/landmine/IED	Military Forces of Somalia (2004-2012)		1	12	Eastern Africa	Somalia	Banadir	Banadir		Mogadishu	2.0414	45.3337	1	Local Source	Local	RCIED targeting a TFG mini-bus exploded along Ali Boley road. The device was detonated after the bus had passed and missed its target. 1 civilian was however killed and 2 wounded.	1	1561469335	SOM
5322120	706	SOM6952	6952	2011-02-26	2011	1	Battles	Armed clash	AMISOM: African Union Mission in Somalia (2007-)		8	28	Eastern Africa	Somalia	Banadir	Banadir		Wardhigley	2.0549	45.33	1	Local Source	Local	Exchange of artillery fire between AMISOM and AS-held areas was reported in the morning. One of the rounds reportedly landed in a residential area killing 1 civilian and injuring 6 others.	1	1561469335	SOM
4948768	706	SOM6953	6953	2011-02-27	2011	1	Strategic developments	Change to group/activity	Al Shabaab		2	20	Eastern Africa	Somalia	Hiraan	Belet Weyne		Belet Weyne	4.736	45.2043	1	Crisis Watch	Other	Movement of forces: Al Shabaab moved additional forces to Mogadishu and Beletweyn, 27 Feb warned of retaliation against Kenyan govt.	0	1552577539	SOM
5322122	706	SOM6955	6955	2011-02-27	2011	1	Battles	Armed clash	Al Shabaab		2	12	Eastern Africa	Somalia	Banadir	Banadir		Daynile	2.0581	45.3003	1	Local Source	Local	AS launched another attack against AMISOM forces occupying the former Ministry of Defense. The engagement was relatively brief and AS pulled back to their original positions.	0	1561469335	SOM
5322121	706	SOM6954	6954	2011-02-27	2011	1	Strategic developments	Change to group/activity	Al Shabaab		2	20	Eastern Africa	Somalia	Gedo	Doolow		Bula Hawa	3.9276	41.8742	1	Local Source	Local	Movement of forces: Unconfirmed reports indicate that an AS battalion of elite forces has been deployed in Bulo-Xawo and that operatives from the AS intelligence services (Amniyat) were being deployed in Mandera town.	0	1561469335	SOM
5322122	706	SOM6955	6955	2011-02-27	2011	1	Battles	Armed clash	Military Forces of Somalia (2004-2012)		1	12	Eastern Africa	Somalia	Banadir	Banadir		Daynile	2.0581	45.3003	1	Local Source	Local	AS launched another attack against AMISOM forces occupying the former Ministry of Defense. The engagement was relatively brief and AS pulled back to their original positions.	0	1561469335	SOM
5322124	706	SOM6957	6957	2011-02-28	2011	1	Explosions/Remote violence	Shelling/artillery/missile attack	Al Shabaab		2	12	Eastern Africa	Somalia	Banadir	Banadir		Villa Somalia	2.0411	45.3368	1	Local Source	Local	3 mortars were reportedly fired at Villa Somalia by AS but all missed the assumed target. One mortar fell close to the National Theatre injuring 3 civilians, the other two exploded in non-residential areas in the neigbourood of Villa Somalia, causing no injuries.	0	1561469335	SOM
5322127	706	SOM6960	6960	2011-02-28	2011	1	Battles	Armed clash	Al Shabaab		2	28	Eastern Africa	Somalia	Banadir	Banadir		Hodan	2.0333	45.35	1	Local Source	Local	AS launched another attack against TFG/AMISOM positions in the ex-Ministry of Defense on Sunday night . At least 5 civilians were killed and more than 10 others injured.	5	1561469335	SOM
5322126	706	SOM6959	6959	2011-02-28	2011	1	Explosions/Remote violence	Grenade	Unidentified Armed Group (Somalia)		3	37	Eastern Africa	Somalia	Lower Shabelle	Afgooye		Madiina	2.2204	45.2259	1	Local Source	Local	A hand grenade that was hurled towards a UN office building missed its target and landed outside the compound. No casualties or damage to the compound were reported.	0	1561469335	SOM
5322126	706	SOM6959	6959	2011-02-28	2011	1	Explosions/Remote violence	Grenade	Civilians (Somalia)		7	37	Eastern Africa	Somalia	Lower Shabelle	Afgooye		Madiina	2.2204	45.2259	1	Local Source	Local	A hand grenade that was hurled towards a UN office building missed its target and landed outside the compound. No casualties or damage to the compound were reported.	0	1561469335	SOM
5322124	706	SOM6957	6957	2011-02-28	2011	1	Explosions/Remote violence	Shelling/artillery/missile attack	Military Forces of Somalia (2004-2012)		1	12	Eastern Africa	Somalia	Banadir	Banadir		Villa Somalia	2.0411	45.3368	1	Local Source	Local	3 mortars were reportedly fired at Villa Somalia by AS but all missed the assumed target. One mortar fell close to the National Theatre injuring 3 civilians, the other two exploded in non-residential areas in the neigbourood of Villa Somalia, causing no injuries.	0	1561469335	SOM
5322123	706	SOM6956	6956	2011-02-28	2011	1	Strategic developments	Change to group/activity	Unidentified Armed Group (Somalia)		3	30	Eastern Africa	Somalia	Banadir	Banadir		Mogadishu Stadium	2.0681	45.3358	3	Local Source	Local	Movement of forces: An unspecified number of foreign fighters (predominantly from African origin) have reportedly recently arrived in Somalia, reaching Lower Juba by sea and then being redeployed to other locations in South-Central Somalia.	0	1561469335	SOM
5322127	706	SOM6960	6960	2011-02-28	2011	1	Battles	Armed clash	AMISOM: African Union Mission in Somalia (2007-)		8	28	Eastern Africa	Somalia	Banadir	Banadir		Hodan	2.0333	45.35	1	Local Source	Local	AS launched another attack against TFG/AMISOM positions in the ex-Ministry of Defense on Sunday night . At least 5 civilians were killed and more than 10 others injured.	5	1561469335	SOM
5322125	706	SOM6958	6958	2011-02-28	2011	1	Battles	Government regains territory	Military Forces of Somalia (2004-2012) Puntland Security Force		1	13	Eastern Africa	Somalia	Mudug	Gaalkacyo		Gaalkacyo	6.7697	47.4308	1	Local Source	Local	On 28/02 at 08.00 Puntland Security forces launched a new security operation in Hero Dayah neighborhood and clashed with a group of armed militias that were involved in the selling of alcohol and drugs. The security forces took control of the sites after 40 minutes of skirmishes and arrested 7 persons. 3 persons were injured (2 militiamen, 1 civilian).	0	1561469335	SOM
5322125	706	SOM6958	6958	2011-02-28	2011	1	Battles	Government regains territory	Unidentified Armed Group (Somalia)		3	13	Eastern Africa	Somalia	Mudug	Gaalkacyo		Gaalkacyo	6.7697	47.4308	1	Local Source	Local	On 28/02 at 08.00 Puntland Security forces launched a new security operation in Hero Dayah neighborhood and clashed with a group of armed militias that were involved in the selling of alcohol and drugs. The security forces took control of the sites after 40 minutes of skirmishes and arrested 7 persons. 3 persons were injured (2 militiamen, 1 civilian).	0	1561469335	SOM
5322131	706	SOM6964	6964	2011-03-01	2011	1	Battles	Armed clash	Al Shabaab		2	28	Eastern Africa	Somalia	Sool	Taleex		Taleex	9.1494	48.4208	1	Local Source	Local	AS and TFG/AMISOM forces sporadically clashed in Talex neighborhood of Hodan district. No casualties were reported.	0	1561469335	SOM
5322130	706	SOM6963	6963	2011-03-01	2011	1	Battles	Armed clash	Al Shabaab		2	28	Eastern Africa	Somalia	Banadir	Banadir		Daynile	2.0581	45.3003	1	Local Source	Local	TFG/AMISOM forces were again attacked by AS fighters in Odweyne area, near the former Defense Ministry in Dayniile district. The AS attack was repelled. At least one TFG soldier is believed to have been injured.	0	1561469335	SOM
5322128	706	SOM6961	6961	2011-03-01	2011	1	Battles	Armed clash	Al Shabaab		2	12	Eastern Africa	Somalia	Banadir	Banadir		Bondhere	2.0456	45.34	1	Local Source	Local	AS and TFG forces briefly exchanged artillery fire in the above mentioned areas.	0	1561469335	SOM
5322129	706	SOM6962	6962	2011-03-01	2011	1	Battles	Armed clash	Al Shabaab		2	12	Eastern Africa	Somalia	Banadir	Banadir		Yaaqshiid	2.0678	45.35	1	Local Source	Local	AS and TFG forces briefly exchanged artillery fire in the above mentioned areas.	0	1561469335	SOM
5322131	706	SOM6964	6964	2011-03-01	2011	1	Battles	Armed clash	AMISOM: African Union Mission in Somalia (2007-)	Military Forces of Somalia (2004-2012)	8	28	Eastern Africa	Somalia	Sool	Taleex		Taleex	9.1494	48.4208	1	Local Source	Local	AS and TFG/AMISOM forces sporadically clashed in Talex neighborhood of Hodan district. No casualties were reported.	0	1561469335	SOM
5322132	706	SOM6965	6965	2011-03-01	2011	1	Battles	Armed clash	Military Forces of Somaliland (2010-)		1	13	Eastern Africa	Somalia	Togdheer	Buuhoodle		Buuhoodle	8.2516	46.3157	1	Local Source	Local	Somaliland forces clashed with the SSC militia near Kashaale. The clashes are believed to have started after the SSC fired several artillery rounds towards Somaliland forces. No casualties have been reported.	0	1561469335	SOM
5322132	706	SOM6965	6965	2011-03-01	2011	1	Battles	Armed clash	SSC: Sool, Sanaag and Cayn Militia		3	13	Eastern Africa	Somalia	Togdheer	Buuhoodle		Buuhoodle	8.2516	46.3157	1	Local Source	Local	Somaliland forces clashed with the SSC militia near Kashaale. The clashes are believed to have started after the SSC fired several artillery rounds towards Somaliland forces. No casualties have been reported.	0	1561469335	SOM
5322130	706	SOM6963	6963	2011-03-01	2011	1	Battles	Armed clash	AMISOM: African Union Mission in Somalia (2007-)	Military Forces of Somalia (2004-2012)	8	28	Eastern Africa	Somalia	Banadir	Banadir		Daynile	2.0581	45.3003	1	Local Source	Local	TFG/AMISOM forces were again attacked by AS fighters in Odweyne area, near the former Defense Ministry in Dayniile district. The AS attack was repelled. At least one TFG soldier is believed to have been injured.	0	1561469335	SOM
5322128	706	SOM6961	6961	2011-03-01	2011	1	Battles	Armed clash	Military Forces of Somalia (2004-2012)		1	12	Eastern Africa	Somalia	Banadir	Banadir		Bondhere	2.0456	45.34	1	Local Source	Local	AS and TFG forces briefly exchanged artillery fire in the above mentioned areas.	0	1561469335	SOM
5322129	706	SOM6962	6962	2011-03-01	2011	1	Battles	Armed clash	Military Forces of Somalia (2004-2012)		1	12	Eastern Africa	Somalia	Banadir	Banadir		Yaaqshiid	2.0678	45.35	1	Local Source	Local	AS and TFG forces briefly exchanged artillery fire in the above mentioned areas.	0	1561469335	SOM
5322136	706	SOM6969	6969	2011-03-02	2011	1	Violence against civilians	Attack	Al Shabaab		2	27	Eastern Africa	Somalia	Lower Shabelle	Afgooye		Afgooye	2.15	45.116	1	Local Source	Local	An AS militant opened fire unintentionally and injured two civilians. AS Hisba arrested the militant responsible of the incident.	0	1561469335	SOM
5322135	706	SOM6968	6968	2011-03-02	2011	1	Violence against civilians	Attack	Military Forces of Somalia (2004-2012)		1	17	Eastern Africa	Somalia	Banadir	Banadir		Dharkenley	2.0095	45.25	1	Local Source	Local	2 civilians are believed to have been killed in a shooting that broke out among TFG soldiers after a dispute over the management of a check-point.	0	1561469335	SOM
5322135	706	SOM6968	6968	2011-03-02	2011	1	Violence against civilians	Attack	Civilians (Somalia)		7	17	Eastern Africa	Somalia	Banadir	Banadir		Dharkenley	2.0095	45.25	1	Local Source	Local	2 civilians are believed to have been killed in a shooting that broke out among TFG soldiers after a dispute over the management of a check-point.	0	1561469335	SOM
5322137	706	SOM6970	6970	2011-03-02	2011	1	Explosions/Remote violence	Remote explosive/landmine/IED	Unidentified Armed Group (Somalia)		3	37	Eastern Africa	Somalia	Bari	Bossaso		Bosaso	11.2842	49.1816	1	Local Source	Local	A car of a prominent Galgala elder Hussein Gurhan (Darood/Warsangali/Dubeys/Reer Mohamed) was targeted by an RCIED in close proximity of the Juba Hotel. The targeted elder escaped with unspecified injuries while his driver died in the attack.	0	1561469335	SOM
5322137	706	SOM6970	6970	2011-03-02	2011	1	Explosions/Remote violence	Remote explosive/landmine/IED	Civilians (Somalia)		7	37	Eastern Africa	Somalia	Bari	Bossaso		Bosaso	11.2842	49.1816	1	Local Source	Local	A car of a prominent Galgala elder Hussein Gurhan (Darood/Warsangali/Dubeys/Reer Mohamed) was targeted by an RCIED in close proximity of the Juba Hotel. The targeted elder escaped with unspecified injuries while his driver died in the attack.	0	1561469335	SOM
5322136	706	SOM6969	6969	2011-03-02	2011	1	Violence against civilians	Attack	Civilians (Somalia)		7	27	Eastern Africa	Somalia	Lower Shabelle	Afgooye		Afgooye	2.15	45.116	1	Local Source	Local	An AS militant opened fire unintentionally and injured two civilians. AS Hisba arrested the militant responsible of the incident.	0	1561469335	SOM
5322133	706	SOM6966	6966	2011-03-02	2011	1	Strategic developments	Agreement	Hawiye-Saad-Jalaaf Sub-Clan Militia (Somalia)		4	40	Eastern Africa	Somalia	Mudug	Gaalkacyo		Gaalkacyo	6.7697	47.4308	1	Local Source	Local	Agreement: Hawiye/Saad/Jalaaf sub-clan militias reportedly established road-blocks along the road between South Galkacyo and Bandiiradley. The militiamen were reported to be defectors from Galmudug security forces training camp near Galkacyo (set-up by Abdi Hasan Awale "Qeybdiid").	0	1561469335	SOM
5322138	706	SOM6971	6971	2011-03-02	2011	1	Battles	Armed clash	Unidentified Armed Group (Somalia)		3	38	Eastern Africa	Somalia	Mudug	Gaalkacyo		Gaalkacyo	6.7697	47.4308	1	Local Source	Local	Gunmen believed to be loyal to the owners ofalcohol shops and other businesses in Hero Dayah site attacked PL security personnel with a hand grenade injuring 2. 2 of the perpetrators were apprehended after a brief exchange of fire.	0	1561469335	SOM
5322138	706	SOM6971	6971	2011-03-02	2011	1	Battles	Armed clash	Private Security Forces (Somalia)		8	38	Eastern Africa	Somalia	Mudug	Gaalkacyo		Gaalkacyo	6.7697	47.4308	1	Local Source	Local	Gunmen believed to be loyal to the owners ofalcohol shops and other businesses in Hero Dayah site attacked PL security personnel with a hand grenade injuring 2. 2 of the perpetrators were apprehended after a brief exchange of fire.	0	1561469335	SOM
5322134	706	SOM6967	6967	2011-03-02	2011	1	Battles	Armed clash	Unidentified Armed Group (Somalia)		3	33	Eastern Africa	Somalia	Gedo	Doolow		Bula Hawa	3.9276	41.8742	1	Local Source	Local	A short clash occurred in the morning of 02/03/2011 between the warring parties in Bulo-Xawo. No casualties have been reported.	0	1561469335	SOM
5322134	706	SOM6967	6967	2011-03-02	2011	1	Battles	Armed clash	Unidentified Armed Group (Somalia)		3	33	Eastern Africa	Somalia	Gedo	Doolow		Bula Hawa	3.9276	41.8742	1	Local Source	Local	A short clash occurred in the morning of 02/03/2011 between the warring parties in Bulo-Xawo. No casualties have been reported.	0	1561469335	SOM
5322139	706	SOM6972	6972	2011-03-03	2011	1	Strategic developments	Change to group/activity	Al Shabaab		2	20	Eastern Africa	Somalia	Bay	Baydhaba		Baidoa	3.1172	43.6469	1	Local Source	Local	Recruitment: A demonstration showing support to the newly recruited AS fighters (estimated to 1800) who were sent to Mogadishu frontlines was held in Baidoa. The demonstration was addressed by Sheikh Muqtar Roobow and Sheikh Fuad Shangole at Afar Irdood intersection.	0	1561469335	SOM
4948601	706	SOM6973	6973	2011-03-04	2011	1	Explosions/Remote violence	Shelling/artillery/missile attack	Al Shabaab		2	12	Eastern Africa	Somalia	Banadir	Banadir		Mogadishu	2.0414	45.3337	2	Crisis Watch	Other	4 March Al Shabaab attacks against govt and AU bases triggered heavy shelling of militant-controlled areas; casualties on both sides including civilians.	0	1552577539	SOM
5322141	706	SOM6975	6975	2011-03-04	2011	1	Battles	Armed clash	Al Shabaab		2	12	Eastern Africa	Somalia	Banadir	Banadir		Hodan	2.0333	45.35	1	Local Source	Local	A new round of clashes was reported to from Mogadishus Hodan and Howldawag district on Friday morning. At least one person has been reported dead and 5 others injured.	0	1561469335	SOM
5322140	706	SOM6974	6974	2011-03-04	2011	1	Battles	Armed clash	Al Shabaab		2	12	Eastern Africa	Somalia	Banadir	Banadir		Hawl Wadaag	2.048	45.32	1	Local Source	Local	A new round of clashes was reported to from Mogadishus Hodan and Howldawag district on Friday morning. At least one person has been reported dead and 5 others injured.	1	1561469335	SOM
4948601	706	SOM6973	6973	2011-03-04	2011	1	Explosions/Remote violence	Shelling/artillery/missile attack	Military Forces of Somalia (2004-2012)	AMISOM: African Union Mission in Somalia (2007-)	1	12	Eastern Africa	Somalia	Banadir	Banadir		Mogadishu	2.0414	45.3337	2	Crisis Watch	Other	4 March Al Shabaab attacks against govt and AU bases triggered heavy shelling of militant-controlled areas; casualties on both sides including civilians.	0	1552577539	SOM
5322141	706	SOM6975	6975	2011-03-04	2011	1	Battles	Armed clash	Military Forces of Somalia (2004-2012)		1	12	Eastern Africa	Somalia	Banadir	Banadir		Hodan	2.0333	45.35	1	Local Source	Local	A new round of clashes was reported to from Mogadishus Hodan and Howldawag district on Friday morning. At least one person has been reported dead and 5 others injured.	0	1561469335	SOM
5322140	706	SOM6974	6974	2011-03-04	2011	1	Battles	Armed clash	Military Forces of Somalia (2004-2012)		1	12	Eastern Africa	Somalia	Banadir	Banadir		Hawl Wadaag	2.048	45.32	1	Local Source	Local	A new round of clashes was reported to from Mogadishus Hodan and Howldawag district on Friday morning. At least one person has been reported dead and 5 others injured.	1	1561469335	SOM
5322142	706	SOM6976	6976	2011-03-05	2011	1	Battles	Government regains territory	Al Shabaab		2	23	Eastern Africa	Somalia	Gedo	Belet Xaawo		Belet Xaawo	3.7807	41.8943	1	Local Source	Local	The pro TFG militia and ASWJ fighters based in Doolow supported by ENDF took control of Belet Xawo on Saturday morning after a heavy fight. Up to 49 foreign fighters were captured by the forces alongside an unspecified number of national AS militiamen and a significant number of technicals.	0	1561469335	SOM
5322143	706	SOM6977	6977	2011-03-05	2011	1	Battles	Armed clash	Al Shabaab		2	28	Eastern Africa	Somalia	Banadir	Banadir		Hodan	2.0333	45.35	1	Local Source	Local	A heavy fighting broke out between AMISOM Burundian force based at the Ministry of Defense in Hodan district and AS on Saturday Morning. AMISOM is believed to have repelled the attack. The number of causalities is currently unknown.	0	1561469335	SOM
5322142	706	SOM6976	6976	2011-03-05	2011	1	Battles	Government regains territory	ASWJ: Ahlu Sunna Wal Jamaa	Military Forces of Somalia (2004-2012)	3	23	Eastern Africa	Somalia	Gedo	Belet Xaawo		Belet Xaawo	3.7807	41.8943	1	Local Source	Local	The pro TFG militia and ASWJ fighters based in Doolow supported by ENDF took control of Belet Xawo on Saturday morning after a heavy fight. Up to 49 foreign fighters were captured by the forces alongside an unspecified number of national AS militiamen and a significant number of technicals.	0	1561469335	SOM
4948542	706	SOM6978	6978	2011-03-05	2011	1	Battles	Armed clash	AMISOM: African Union Mission in Somalia (2007-)		8	38	Eastern Africa	Somalia	Banadir	Banadir		Mogadishu	2.0414	45.3337	1	Crisis Watch	Other	Reports 5 March indicated at least 50 AMISOM troops killed, some 150 injured during major offensive against militants in Mogadishu in Feb.	50	1552577539	SOM
4948542	706	SOM6978	6978	2011-03-05	2011	1	Battles	Armed clash	Unidentified Armed Group (Somalia)		3	38	Eastern Africa	Somalia	Banadir	Banadir		Mogadishu	2.0414	45.3337	1	Crisis Watch	Other	Reports 5 March indicated at least 50 AMISOM troops killed, some 150 injured during major offensive against militants in Mogadishu in Feb.	50	1552577539	SOM
5322143	706	SOM6977	6977	2011-03-05	2011	1	Battles	Armed clash	AMISOM: African Union Mission in Somalia (2007-)		8	28	Eastern Africa	Somalia	Banadir	Banadir		Hodan	2.0333	45.35	1	Local Source	Local	A heavy fighting broke out between AMISOM Burundian force based at the Ministry of Defense in Hodan district and AS on Saturday Morning. AMISOM is believed to have repelled the attack. The number of causalities is currently unknown.	0	1561469335	SOM
5322144	706	SOM6979	6979	2011-03-06	2011	1	Protests	Peaceful protest	Protesters (Somalia)		6	60	Eastern Africa	Somalia	Sool	Laas Caanood		Laascaanood	8.4774	47.3597	1	Local Source	Local	A demonstration protesting against a visit of the SL Minister of Information, Deputy Leader of the SL Parliament and other members SL administration took place in Laascanood on Sunday evening. The Police forces intervened by opening fire in the air to disperse the crowd. One of the demonstrators was reportedly injured in a collision with a police car.	0	1561469335	SOM
5322145	706	SOM6980	6980	2011-03-07	2011	1	Strategic developments	Change to group/activity	Al Shabaab		2	20	Eastern Africa	Somalia	Gedo	Baardheere		Bardera	2.3385	42.2843	1	Local Source	Local	Movement of forces: Al Shabaab is reportedly reinforcing its positions in Bardhere. Troops coming from Jubbas, Bay, Bakool and Gedo region have reportedly reached Bardhere on 7th March. AS is reportedly also digging defensive trenches.	0	1561469335	SOM
5322146	706	SOM6981	6981	2011-03-07	2011	1	Strategic developments	Change to group/activity	Al Shabaab		2	20	Eastern Africa	Somalia	Gedo	Luuq		Urkut	3.519	42.7703	1	Local Source	Local	Movement of forces: Al Shabaab forces were reported to be regrouping in Yurkud village on the border of Bay and Gedo regions.	0	1561469335	SOM
5322149	706	SOM6984	6984	2011-03-07	2011	1	Violence against civilians	Attack	Unidentified Armed Group (Somalia)		3	37	Eastern Africa	Somalia	Sool	Laas Caanood		Laascaanood	8.4774	47.3597	1	Local Source	Local	Head of SL Intelligence Department in Sool Region was assassinated (shot) by unknown gunmen and his deputy was injured. A civilian bystander also died in the attack. Curfew was imposed on Laasanood following the incident.	2	1561469335	SOM
5322149	706	SOM6984	6984	2011-03-07	2011	1	Violence against civilians	Attack	Civilians (Somalia)		7	37	Eastern Africa	Somalia	Sool	Laas Caanood		Laascaanood	8.4774	47.3597	1	Local Source	Local	Head of SL Intelligence Department in Sool Region was assassinated (shot) by unknown gunmen and his deputy was injured. A civilian bystander also died in the attack. Curfew was imposed on Laasanood following the incident.	2	1561469335	SOM
5322147	706	SOM6982	6982	2011-03-07	2011	1	Battles	Armed clash	Military Forces of Somalia (2004-2012)		1	11	Eastern Africa	Somalia	Banadir	Banadir		Dharkenley	2.0095	45.25	1	Local Source	Local	TFG Security Forces loyal to Dharkenley Deputy District Commissioner Yusuf Kabable (Hawiye/Abgal/Kabale) and forces loyal to Medina District Commissioner Ahmed Daai (Hawiye/Abgal/Daud) exchanged fire at Moallim Garage area. 2 soldier were killed and 6 others including civilians injured. The shooting is believed to be related to a carjacking case that occurred between the groups earlier on Monday.	2	1561469335	SOM
5322147	706	SOM6982	6982	2011-03-07	2011	1	Battles	Armed clash	Military Forces of Somalia (2004-2012)		1	11	Eastern Africa	Somalia	Banadir	Banadir		Dharkenley	2.0095	45.25	1	Local Source	Local	TFG Security Forces loyal to Dharkenley Deputy District Commissioner Yusuf Kabable (Hawiye/Abgal/Kabale) and forces loyal to Medina District Commissioner Ahmed Daai (Hawiye/Abgal/Daud) exchanged fire at Moallim Garage area. 2 soldier were killed and 6 others including civilians injured. The shooting is believed to be related to a carjacking case that occurred between the groups earlier on Monday.	2	1561469335	SOM
5322148	706	SOM6983	6983	2011-03-07	2011	1	Battles	Armed clash	Military Forces of Somaliland (2010-)		1	13	Eastern Africa	Somalia	Sool	Laas Caanood		Laascaanood	8.4774	47.3597	1	Local Source	Local	Somaliland forces and SSC militia clashed in Gamadaha. The SSC militia attacked SL forces based at Gamadaha at 2:00 pm in an attempt to take control of a local airstrip. 2 SSC fighters are believed to have been killed in the attack. One technical belonging to SSC was captured by SL forces. No causalities on the SL side were reported. SL is believed to have defended its positions.	0	1561469335	SOM
5322148	706	SOM6983	6983	2011-03-07	2011	1	Battles	Armed clash	SSC: Sool, Sanaag and Cayn Militia		3	13	Eastern Africa	Somalia	Sool	Laas Caanood		Laascaanood	8.4774	47.3597	1	Local Source	Local	Somaliland forces and SSC militia clashed in Gamadaha. The SSC militia attacked SL forces based at Gamadaha at 2:00 pm in an attempt to take control of a local airstrip. 2 SSC fighters are believed to have been killed in the attack. One technical belonging to SSC was captured by SL forces. No causalities on the SL side were reported. SL is believed to have defended its positions.	0	1561469335	SOM
5322151	706	SOM6986	6986	2011-03-08	2011	1	Battles	Armed clash	Al Shabaab		2	23	Eastern Africa	Somalia	Lower Juba	Afmadow		Dhobley	0.4063	41.0124	1	Local Source	Local	Militia (Ahmed Madoobe) launched a small-scale artillery attack against AS positions in Dhoobley on Tuesday night. No casualties have been reported.	0	1561469335	SOM
5322150	706	SOM6985	6985	2011-03-08	2011	1	Battles	Armed clash	Al Shabaab		2	12	Eastern Africa	Somalia	Banadir	Banadir		Hodan	2.0333	45.35	1	Local Source	Local	AS militants attacked TFG/AMISOM troops at the above mentioned area (near Jaale Siyad Military Academy). One civilian was reportedly killed and 7 other were injured. AS forces retreated.	1	1561469335	SOM
5322152	706	SOM6987	6987	2011-03-08	2011	1	Battles	Armed clash	Al Shabaab		2	23	Eastern Africa	Somalia	Gedo	Ceel Waaq		El Wak	2.7352	41.0177	1	Local Source	Local	At around 03.00 in the night of 07-08/03/11 AS forces launched an attack against militias that had taken the town the day before. AS had reportedly withdrew from Ceel-Waaq on 06/03/11 but had kept their forces in the vicinity of the town. Somali militias trained in Kenya in Isiolo, forces loyal to Barre "Hiiraale" and Ethiopian Reserves forces are reportedly fighting against AS in Ceel Waaq.	0	1561469335	SOM
5322151	706	SOM6986	6986	2011-03-08	2011	1	Battles	Armed clash	Militia (Ahmed Madoobe)		3	23	Eastern Africa	Somalia	Lower Juba	Afmadow		Dhobley	0.4063	41.0124	1	Local Source	Local	Militia (Ahmed Madoobe) launched a small-scale artillery attack against AS positions in Dhoobley on Tuesday night. No casualties have been reported.	0	1561469335	SOM
5322150	706	SOM6985	6985	2011-03-08	2011	1	Battles	Armed clash	Military Forces of Somalia (2004-2012)	AMISOM: African Union Mission in Somalia (2007-)	1	12	Eastern Africa	Somalia	Banadir	Banadir		Hodan	2.0333	45.35	1	Local Source	Local	AS militants attacked TFG/AMISOM troops at the above mentioned area (near Jaale Siyad Military Academy). One civilian was reportedly killed and 7 other were injured. AS forces retreated.	1	1561469335	SOM
5322153	706	SOM6988	6988	2011-03-08	2011	1	Battles	Armed clash	Qubeys Clan Militia (Somalia)		4	44	Eastern Africa	Somalia	Mudug	Gaalkacyo		Bacadweyne	7.19	47.53	1	Local Source	Local	Inter-clan clashes were reported in Bacadweyne area. The clashes opposed Qubeys (Dir) and Saleban clans. 2 persons were reportedly killed and 8 injured. The two clans had clashed several times in past two years over grazing and water points on their territorial borderlines.	2	1561469335	SOM
5322153	706	SOM6988	6988	2011-03-08	2011	1	Battles	Armed clash	Saleban Clan Militia (Somalia)		4	44	Eastern Africa	Somalia	Mudug	Gaalkacyo		Bacadweyne	7.19	47.53	1	Local Source	Local	Inter-clan clashes were reported in Bacadweyne area. The clashes opposed Qubeys (Dir) and Saleban clans. 2 persons were reportedly killed and 8 injured. The two clans had clashed several times in past two years over grazing and water points on their territorial borderlines.	2	1561469335	SOM
5322152	706	SOM6987	6987	2011-03-08	2011	1	Battles	Armed clash	Militia (Barre Adan Shire Hiraale)	Isiolo Militia	3	23	Eastern Africa	Somalia	Gedo	Ceel Waaq		El Wak	2.7352	41.0177	1	Local Source	Local	At around 03.00 in the night of 07-08/03/11 AS forces launched an attack against militias that had taken the town the day before. AS had reportedly withdrew from Ceel-Waaq on 06/03/11 but had kept their forces in the vicinity of the town. Somali militias trained in Kenya in Isiolo, forces loyal to Barre "Hiiraale" and Ethiopian Reserves forces are reportedly fighting against AS in Ceel Waaq.	0	1561469335	SOM
5322154	706	SOM6989	6989	2011-03-09	2011	1	Battles	Armed clash	Al Shabaab		2	12	Eastern Africa	Somalia	Banadir	Banadir		Mogadishu	2.0414	45.3337	1	Local Source	Local	AS militants attacked AMISOM/TFG positions in the above mentioned areas. 2 TFG soldiers were reportedly injured. AS were repelled.	0	1561469335	SOM
5322155	706	SOM6990	6990	2011-03-09	2011	1	Battles	Armed clash	Al Shabaab		2	28	Eastern Africa	Somalia	Banadir	Banadir		Hodan	2.0333	45.35	1	Local Source	Local	AS militants launched another attack against AMISOM forces based in the vicinity of the ex-Ministry of Defense. AS were repelled. No information is available on number of casualties.	0	1561469335	SOM
5322154	706	SOM6989	6989	2011-03-09	2011	1	Battles	Armed clash	Military Forces of Somalia (2004-2012)	AMISOM: African Union Mission in Somalia (2007-)	1	12	Eastern Africa	Somalia	Banadir	Banadir		Mogadishu	2.0414	45.3337	1	Local Source	Local	AS militants attacked AMISOM/TFG positions in the above mentioned areas. 2 TFG soldiers were reportedly injured. AS were repelled.	0	1561469335	SOM
5322155	706	SOM6990	6990	2011-03-09	2011	1	Battles	Armed clash	AMISOM: African Union Mission in Somalia (2007-)		8	28	Eastern Africa	Somalia	Banadir	Banadir		Hodan	2.0333	45.35	1	Local Source	Local	AS militants launched another attack against AMISOM forces based in the vicinity of the ex-Ministry of Defense. AS were repelled. No information is available on number of casualties.	0	1561469335	SOM
5322156	706	SOM6991	6991	2011-03-10	2011	1	Battles	Armed clash	Al Shabaab		2	23	Eastern Africa	Somalia	Galgaduud	Dhuusamarreeb		Dhuusamarreeb	5.5376	46.3867	3	Local Source	Local	Armed clashes between AS and ASWJ forces were reported in Dhusamareb District (God-Dhurwa or Buclale, not confirmed). AS militias had been reported moving from Jowhar and Xarar-Dheere towards Ceel-Buur the day before.	0	1561469335	SOM
5322156	706	SOM6991	6991	2011-03-10	2011	1	Battles	Armed clash	ASWJ: Ahlu Sunna Wal Jamaa		3	23	Eastern Africa	Somalia	Galgaduud	Dhuusamarreeb		Dhuusamarreeb	5.5376	46.3867	3	Local Source	Local	Armed clashes between AS and ASWJ forces were reported in Dhusamareb District (God-Dhurwa or Buclale, not confirmed). AS militias had been reported moving from Jowhar and Xarar-Dheere towards Ceel-Buur the day before.	0	1561469335	SOM
5322159	706	SOM6994	6994	2011-03-10	2011	1	Explosions/Remote violence	Shelling/artillery/missile attack	AMISOM: African Union Mission in Somalia (2007-)		8	78	Eastern Africa	Somalia	Banadir	Banadir		Yaaqshiid	2.0678	45.35	1	Local Source	Local	AMISOM Spokesman Major Barigye Ba-Hoku informed local medias that AMISOM had used multiple-rocket launchers to shell concentrations of AS forces in the above mentioned areas. Local medias reported that the shelling had caused the death of 5 civilians and injured 10 others but did not mention casualties on the side of AS.	1	1561469335	SOM
5322159	706	SOM6994	6994	2011-03-10	2011	1	Explosions/Remote violence	Shelling/artillery/missile attack	Civilians (Somalia)		7	78	Eastern Africa	Somalia	Banadir	Banadir		Yaaqshiid	2.0678	45.35	1	Local Source	Local	AMISOM Spokesman Major Barigye Ba-Hoku informed local medias that AMISOM had used multiple-rocket launchers to shell concentrations of AS forces in the above mentioned areas. Local medias reported that the shelling had caused the death of 5 civilians and injured 10 others but did not mention casualties on the side of AS.	1	1561469335	SOM
5322158	706	SOM6993	6993	2011-03-10	2011	1	Explosions/Remote violence	Shelling/artillery/missile attack	AMISOM: African Union Mission in Somalia (2007-)		8	78	Eastern Africa	Somalia	Banadir	Banadir		Wardhigley	2.0549	45.33	1	Local Source	Local	AMISOM Spokesman Major Barigye Ba-Hoku informed local medias that AMISOM had used multiple-rocket launchers to shell concentrations of AS forces in the above mentioned areas. Local medias reported that the shelling had caused the death of 5 civilians and injured 10 others but did not mention casualties on the side of AS.	2	1561469335	SOM
5322158	706	SOM6993	6993	2011-03-10	2011	1	Explosions/Remote violence	Shelling/artillery/missile attack	Civilians (Somalia)		7	78	Eastern Africa	Somalia	Banadir	Banadir		Wardhigley	2.0549	45.33	1	Local Source	Local	AMISOM Spokesman Major Barigye Ba-Hoku informed local medias that AMISOM had used multiple-rocket launchers to shell concentrations of AS forces in the above mentioned areas. Local medias reported that the shelling had caused the death of 5 civilians and injured 10 others but did not mention casualties on the side of AS.	2	1561469335	SOM
5322157	706	SOM6992	6992	2011-03-10	2011	1	Explosions/Remote violence	Shelling/artillery/missile attack	AMISOM: African Union Mission in Somalia (2007-)		8	78	Eastern Africa	Somalia	Banadir	Banadir		Daynile	2.0581	45.3003	1	Local Source	Local	AMISOM Spokesman Major Barigye Ba-Hoku informed local medias that AMISOM had used multiple-rocket launchers to shell concentrations of AS forces in the above mentioned areas. Local medias reported that the shelling had caused the death of 5 civilians and injured 10 others but did not mention casualties on the side of AS.	2	1561469335	SOM
5322157	706	SOM6992	6992	2011-03-10	2011	1	Explosions/Remote violence	Shelling/artillery/missile attack	Civilians (Somalia)		7	78	Eastern Africa	Somalia	Banadir	Banadir		Daynile	2.0581	45.3003	1	Local Source	Local	AMISOM Spokesman Major Barigye Ba-Hoku informed local medias that AMISOM had used multiple-rocket launchers to shell concentrations of AS forces in the above mentioned areas. Local medias reported that the shelling had caused the death of 5 civilians and injured 10 others but did not mention casualties on the side of AS.	2	1561469335	SOM
5322162	706	SOM6997	6997	2011-03-11	2011	1	Battles	Armed clash	Al Shabaab		2	12	Eastern Africa	Somalia	Banadir	Banadir		Hodan	2.0333	45.35	1	Local Source	Local	An armed clash between TFG/AMISOM soldiers and AS fighters occurred at Siigaale neighborhood in Hodan district. This was after AS fighters fired RPGs and B10 rounds at TFG/AMISOM positions. Casualties could not be established.	0	1561469335	SOM
5322161	706	SOM6996	6996	2011-03-11	2011	1	Battles	Armed clash	Al Shabaab		2	12	Eastern Africa	Somalia	Banadir	Banadir		Dharkenley	2.0095	45.25	1	Local Source	Local	AS forces launched an attack against TFG forces based at the above mentioned area. Five AS fighters and two TFG soldiers were reportedly killed, while three other TFG soldiers were injured.	7	1561469335	SOM
5322164	706	SOM6999	6999	2011-03-11	2011	1	Battles	Armed clash	Al Shabaab		2	12	Eastern Africa	Somalia	Banadir	Banadir		Hodan	2.0333	45.35	1	Local Source	Local	TFG/AMISOM soldiers and AS fighters clashed at the Arwada building area in Talex neighborhood in Hodan district. AS fighters had attacked TFG/AMISOM defense positions in the area but were forced to retreat after an hour of fighting. Two TFG soldiers were injured, but casualties among AS fighters could not be established.	0	1561469335	SOM
5322163	706	SOM6998	6998	2011-03-11	2011	1	Battles	Armed clash	Al Shabaab		2	12	Eastern Africa	Somalia	Banadir	Banadir		Hodan	2.0333	45.35	1	Local Source	Local	Sporadic armed clashes and exchange of artillery fire between TFG/AMISOM soldiers and AS fighters were reported at Dabka area in Hodan district. AS fighters fired RPGs and B10 rounds at TFG/AMISOM positions but were repulsed. Casualties could not be established.	0	1561469335	SOM
5322162	706	SOM6997	6997	2011-03-11	2011	1	Battles	Armed clash	Military Forces of Somalia (2004-2012)	AMISOM: African Union Mission in Somalia (2007-)	1	12	Eastern Africa	Somalia	Banadir	Banadir		Hodan	2.0333	45.35	1	Local Source	Local	An armed clash between TFG/AMISOM soldiers and AS fighters occurred at Siigaale neighborhood in Hodan district. This was after AS fighters fired RPGs and B10 rounds at TFG/AMISOM positions. Casualties could not be established.	0	1561469335	SOM
5322161	706	SOM6996	6996	2011-03-11	2011	1	Battles	Armed clash	Military Forces of Somalia (2004-2012)		1	12	Eastern Africa	Somalia	Banadir	Banadir		Dharkenley	2.0095	45.25	1	Local Source	Local	AS forces launched an attack against TFG forces based at the above mentioned area. Five AS fighters and two TFG soldiers were reportedly killed, while three other TFG soldiers were injured.	7	1561469335	SOM
5322164	706	SOM6999	6999	2011-03-11	2011	1	Battles	Armed clash	Military Forces of Somalia (2004-2012)	AMISOM: African Union Mission in Somalia (2007-)	1	12	Eastern Africa	Somalia	Banadir	Banadir		Hodan	2.0333	45.35	1	Local Source	Local	TFG/AMISOM soldiers and AS fighters clashed at the Arwada building area in Talex neighborhood in Hodan district. AS fighters had attacked TFG/AMISOM defense positions in the area but were forced to retreat after an hour of fighting. Two TFG soldiers were injured, but casualties among AS fighters could not be established.	0	1561469335	SOM
5322163	706	SOM6998	6998	2011-03-11	2011	1	Battles	Armed clash	Military Forces of Somalia (2004-2012)	AMISOM: African Union Mission in Somalia (2007-)	1	12	Eastern Africa	Somalia	Banadir	Banadir		Hodan	2.0333	45.35	1	Local Source	Local	Sporadic armed clashes and exchange of artillery fire between TFG/AMISOM soldiers and AS fighters were reported at Dabka area in Hodan district. AS fighters fired RPGs and B10 rounds at TFG/AMISOM positions but were repulsed. Casualties could not be established.	0	1561469335	SOM
5322160	706	SOM6995	6995	2011-03-11	2011	1	Strategic developments	Agreement	Pirates (Somalia)		3	30	Eastern Africa	Somalia	Mudug	Jariiban		Jariiban	7.2135	48.851	1	Local Source	Local	Agreement: The national staff of an INGO that had been abducted by pirates in Burtinle on 20/02 was released in the afternoon of 11/03. The release occurred after clan elders exerted heavy pressure on the abductors.	0	1561469335	SOM
5322167	706	SOM7001	7001	2011-03-12	2011	1	Battles	Armed clash	Al Shabaab		2	12	Eastern Africa	Somalia	Banadir	Banadir		Bondhere	2.0456	45.34	1	Local Source	Local	A TFG soldier was shot and killed by an AS sniper in Juba area in Boondheere district.	1	1561469335	SOM
5322169	706	SOM7003	7003	2011-03-12	2011	1	Battles	Armed clash	Al Shabaab		2	23	Eastern Africa	Somalia	Lower Juba	Badhaadhe		Baadhaade	-1.03	41.483	1	Local Source	Local	AS forces took back Diif village from Militia (Ahmed Madoobe) after a fighting that lasted several hours. Ahmed Madoobes militias are said to retake control of the village after a second engagement later in the afternoon of the same day. Somali medias report heavy casualties and destruction of properties.	0	1561469335	SOM
5322168	706	SOM7002	7002	2011-03-12	2011	1	Battles	Armed clash	Al Shabaab		2	12	Eastern Africa	Somalia	Banadir	Banadir		Hodan	2.0333	45.35	1	Local Source	Local	TFG/AMISOM soldiers engaged AS in heavy clashes at Siigaale and Dabka junction areas of Hodan district. This was after AS fighters fired several B10 rounds and RPGs against the aforementioned TFG/AMISOM positions but were repulsed. Initial reports indicate that two AS fighters, one TFG soldier and two others were reportedly killed while three TFG soldiers and four others were injured.	5	1561469335	SOM
5322170	706	SOM7004	7004	2011-03-12	2011	1	Explosions/Remote violence	Grenade	Unidentified Armed Group (Somalia)		3	37	Eastern Africa	Somalia	Lower Shabelle	Afgooye		Madiina	2.2204	45.2259	1	Local Source	Local	Unidentified attacker(s) threw a hand grenade in the office compound of an INGO in Medina district. The grenade exploded without causing any casualties.	0	1561469335	SOM
5322170	706	SOM7004	7004	2011-03-12	2011	1	Explosions/Remote violence	Grenade	Civilians (Somalia)		7	37	Eastern Africa	Somalia	Lower Shabelle	Afgooye		Madiina	2.2204	45.2259	1	Local Source	Local	Unidentified attacker(s) threw a hand grenade in the office compound of an INGO in Medina district. The grenade exploded without causing any casualties.	0	1561469335	SOM
5322166	706	SOM7000	7000	2011-03-12	2011	1	Strategic developments	Change to group/activity	AMISOM: African Union Mission in Somalia (2007-)		8	80	Eastern Africa	Somalia	Banadir	Banadir		Mogadishu	2.0414	45.3337	1	Local Source	Local	Movement of forces: The last 125 of 1000 Burundian soldiers reached Mogadishu in the evening. The deployment of these additional forces started on 06/03. The Burundian forces in Mogadishu are now reaching 4400 men.	0	1561469335	SOM
5322167	706	SOM7001	7001	2011-03-12	2011	1	Battles	Armed clash	Military Forces of Somalia (2004-2012)		1	12	Eastern Africa	Somalia	Banadir	Banadir		Bondhere	2.0456	45.34	1	Local Source	Local	A TFG soldier was shot and killed by an AS sniper in Juba area in Boondheere district.	1	1561469335	SOM
5322169	706	SOM7003	7003	2011-03-12	2011	1	Battles	Armed clash	Militia (Ahmed Madoobe)		3	23	Eastern Africa	Somalia	Lower Juba	Badhaadhe		Baadhaade	-1.03	41.483	1	Local Source	Local	AS forces took back Diif village from Militia (Ahmed Madoobe) after a fighting that lasted several hours. Ahmed Madoobes militias are said to retake control of the village after a second engagement later in the afternoon of the same day. Somali medias report heavy casualties and destruction of properties.	0	1561469335	SOM
5322168	706	SOM7002	7002	2011-03-12	2011	1	Battles	Armed clash	Military Forces of Somalia (2004-2012)	AMISOM: African Union Mission in Somalia (2007-)	1	12	Eastern Africa	Somalia	Banadir	Banadir		Hodan	2.0333	45.35	1	Local Source	Local	TFG/AMISOM soldiers engaged AS in heavy clashes at Siigaale and Dabka junction areas of Hodan district. This was after AS fighters fired several B10 rounds and RPGs against the aforementioned TFG/AMISOM positions but were repulsed. Initial reports indicate that two AS fighters, one TFG soldier and two others were reportedly killed while three TFG soldiers and four others were injured.	5	1561469335	SOM
5322174	706	SOM7008	7008	2011-03-13	2011	1	Battles	Armed clash	Al Shabaab		2	23	Eastern Africa	Somalia	Hiraan	Belet Weyne		Ceel Gaal	4.8476	45.2398	1	Local Source	Local	AS forces launched a pre-emptive attack against pro-TFG militias based in Ceel Gaal, around 12km north of Belet-Weyne/K115. The AS forces were repelled and were later dislodged from their defensive positions on Qawlad Hill (9km north of Belet Weyne).	0	1561469335	SOM
5322171	706	SOM7005	7005	2011-03-13	2011	1	Battles	Armed clash	Al Shabaab		2	12	Eastern Africa	Somalia	Banadir	Banadir		Abdul-Aziz	2.0405	45.36	1	Local Source	Local	AS forces launched an attack against AMISOM/TFG forces at around 05.30. Clashes lasted for around 15 minutes. A TFG spokesman in the area declared that several AS militants had been killed and 5 had been captured.	0	1561469335	SOM
5322172	706	SOM7006	7006	2011-03-13	2011	1	Explosions/Remote violence	Shelling/artillery/missile attack	Al Shabaab		2	23	Eastern Africa	Somalia	Gedo	Doolow		Bula Hawa	3.9276	41.8742	1	Local Source	Local	AS fighters have launched a rapid mortar attack against ASWJ forces based in Gedo Town. Locals said attackers were only a small group using one vehicle who quickly left the area after having shot their mortars.	0	1561469335	SOM
5322174	706	SOM7008	7008	2011-03-13	2011	1	Battles	Armed clash	Unidentified Armed Group (Somalia)		3	23	Eastern Africa	Somalia	Hiraan	Belet Weyne		Ceel Gaal	4.8476	45.2398	1	Local Source	Local	AS forces launched a pre-emptive attack against pro-TFG militias based in Ceel Gaal, around 12km north of Belet-Weyne/K115. The AS forces were repelled and were later dislodged from their defensive positions on Qawlad Hill (9km north of Belet Weyne).	0	1561469335	SOM
5322171	706	SOM7005	7005	2011-03-13	2011	1	Battles	Armed clash	Military Forces of Somalia (2004-2012)	AMISOM: African Union Mission in Somalia (2007-)	1	12	Eastern Africa	Somalia	Banadir	Banadir		Abdul-Aziz	2.0405	45.36	1	Local Source	Local	AS forces launched an attack against AMISOM/TFG forces at around 05.30. Clashes lasted for around 15 minutes. A TFG spokesman in the area declared that several AS militants had been killed and 5 had been captured.	0	1561469335	SOM
5322173	706	SOM7007	7007	2011-03-13	2011	1	Battles	Armed clash	Militia (Gen. Indha Adde)	Military Forces of Somalia (2004-2012)	3	33	Eastern Africa	Somalia	Banadir	Banadir		Hodan	2.0333	45.35	1	Local Source	Local	Two groups of TFG militias exchanged fire at the above mentioned area when two of their technicals accidently collided. As a result of the incident one civilian killed and 5 persons, including 3 TFG soldiers, were injured. Unconfirmed reports indicate that the militias involved are loyal to General Indha-Adde and a TFG MP named Hassan Moallim.	1	1561469335	SOM
5322173	706	SOM7007	7007	2011-03-13	2011	1	Battles	Armed clash	Militia (Pro-Government)	Military Forces of Somalia (2004-2012)	3	33	Eastern Africa	Somalia	Banadir	Banadir		Hodan	2.0333	45.35	1	Local Source	Local	Two groups of TFG militias exchanged fire at the above mentioned area when two of their technicals accidently collided. As a result of the incident one civilian killed and 5 persons, including 3 TFG soldiers, were injured. Unconfirmed reports indicate that the militias involved are loyal to General Indha-Adde and a TFG MP named Hassan Moallim.	1	1561469335	SOM
5322172	706	SOM7006	7006	2011-03-13	2011	1	Explosions/Remote violence	Shelling/artillery/missile attack	ASWJ: Ahlu Sunna Wal Jamaa		3	23	Eastern Africa	Somalia	Gedo	Doolow		Bula Hawa	3.9276	41.8742	1	Local Source	Local	AS fighters have launched a rapid mortar attack against ASWJ forces based in Gedo Town. Locals said attackers were only a small group using one vehicle who quickly left the area after having shot their mortars.	0	1561469335	SOM
5322179	706	SOM7013	7013	2011-03-14	2011	1	Explosions/Remote violence	Shelling/artillery/missile attack	Al Shabaab		2	23	Eastern Africa	Somalia	Gedo	Doolow		Bula Hawa	3.9276	41.8742	1	Local Source	Local	AS fighters launched a quick mortar attack against ASWJ forces in Bulo-Xawo. The attack was followed by a brief exchange of fire. One mortar or RPG round reportedly fell close to a house in Mandera injuring 2 or 3 civilians. This came a day after TFG declared Bulo Hawo safe and urged residents who had fled the town to return.	0	1561469335	SOM
5322175	706	SOM7009	7009	2011-03-14	2011	1	Strategic developments	Other	Al Shabaab		2	20	Eastern Africa	Somalia	Lower Juba	Kismaayo		Kismayo	-0.3603	42.5463	1	Local Source	Local	Non-violent activity: The AS organized demonstrations of support in Kismayo with the aim of mobilizing the general public to participate in the ongoing war against the allied forces. AS leaders who addressed the crowd demanded that everybody come out and join AS or face serious consequences.	0	1561469335	SOM
5322180	706	SOM7014	7014	2011-03-14	2011	1	Battles	Armed clash	Al Shabaab		2	23	Eastern Africa	Somalia	Gedo	Ceel Waaq		Busaar	2.6778	41.3254	1	Local Source	Local	AS and pro-TFG forces clashed in Buusaar (around 40km east of Ceel-Waaq on the way to Baardheere). The fighting was initiated by pro-TFG militias coming from Ceel-Waaq. Both sides claimed victories. Casualties are not known.	0	1561469335	SOM
5322178	706	SOM7012	7012	2011-03-14	2011	1	Battles	Armed clash	Al Shabaab		2	12	Eastern Africa	Somalia	Banadir	Banadir		Hodan	2.0333	45.35	1	Local Source	Local	AS militants launched an attack against AMISOM/TFG forces based in the above mentioned area. The clash lasted for around 20 minutes and was accompanied with artillery fire. Local medias reported the death of 5 persons and the injury of more than 8 others, most of them combatants.	5	1561469335	SOM
5322179	706	SOM7013	7013	2011-03-14	2011	1	Explosions/Remote violence	Shelling/artillery/missile attack	ASWJ: Ahlu Sunna Wal Jamaa		3	23	Eastern Africa	Somalia	Gedo	Doolow		Bula Hawa	3.9276	41.8742	1	Local Source	Local	AS fighters launched a quick mortar attack against ASWJ forces in Bulo-Xawo. The attack was followed by a brief exchange of fire. One mortar or RPG round reportedly fell close to a house in Mandera injuring 2 or 3 civilians. This came a day after TFG declared Bulo Hawo safe and urged residents who had fled the town to return.	0	1561469335	SOM
5322177	706	SOM7011	7011	2011-03-14	2011	1	Strategic developments	Change to group/activity	Military Forces of Ethiopia (1995-2018)		8	80	Eastern Africa	Somalia	Gedo	Doolow		Doolow	4.1642	42.0794	1	Local Source	Local	Movement of forces: Reports from reliable sources in Doolow/Ethiopia indicate that 8 tanks and an unspecified number of military carriers have reached the town and were supposed to cross to Somalia over night, the TFG and ASWJ military offensive has been recently postponed by Ethiopian government while the General leading the offensive was called to a meeting in Addis Ababa.	0	1561469335	SOM
5322180	706	SOM7014	7014	2011-03-14	2011	1	Battles	Armed clash	Militia (Pro-Government)	Military Forces of Somalia (2004-2012)	3	23	Eastern Africa	Somalia	Gedo	Ceel Waaq		Busaar	2.6778	41.3254	1	Local Source	Local	AS and pro-TFG forces clashed in Buusaar (around 40km east of Ceel-Waaq on the way to Baardheere). The fighting was initiated by pro-TFG militias coming from Ceel-Waaq. Both sides claimed victories. Casualties are not known.	0	1561469335	SOM
5322178	706	SOM7012	7012	2011-03-14	2011	1	Battles	Armed clash	Military Forces of Somalia (2004-2012)	AMISOM: African Union Mission in Somalia (2007-)	1	12	Eastern Africa	Somalia	Banadir	Banadir		Hodan	2.0333	45.35	1	Local Source	Local	AS militants launched an attack against AMISOM/TFG forces based in the above mentioned area. The clash lasted for around 20 minutes and was accompanied with artillery fire. Local medias reported the death of 5 persons and the injury of more than 8 others, most of them combatants.	5	1561469335	SOM
5322176	706	SOM7010	7010	2011-03-14	2011	1	Strategic developments	Change to group/activity	Military Forces of Ethiopia (1995-2018)		8	80	Eastern Africa	Somalia	Galgaduud	Cabudwaaq		Balanbale	5.689	45.9693	1	Local Source	Local	Movement of forces: EAF units that were based at the former 21st military base and the Dhusamareb airport have all reportedly withdrawn from the area and were said to be headed towards the town of Balambale in Cabudwaaq District.	0	1561469335	SOM
5322186	706	SOM7021	7021	2011-03-15	2011	1	Explosions/Remote violence	Shelling/artillery/missile attack	Al Shabaab		2	28	Eastern Africa	Somalia	Lower Shabelle	Afgooye		Madiina	2.2204	45.2259	1	Local Source	Local	AS allegedly fired an 82 mm mortar round which landed about 500 meters away from the OPD area north-east of the AMISOM Force headquarters. No casualties were reported.	0	1561469335	SOM
5322183	706	SOM7018	7018	2011-03-15	2011	1	Explosions/Remote violence	Shelling/artillery/missile attack	Al Shabaab		2	12	Eastern Africa	Somalia	Banadir	Banadir		Wadajir	2.0462	45.3341	1	Local Source	Local	A mortar round believed to have been fired by AS landed 10 meters away from Villa Baidoa (TFG military HQ) near the perimeter wall. The TFG President has reportedly been staying in Villa Baidoa since the offensive started. No casualties were reported.	0	1561469335	SOM
4948116	706	SOM7017	7017	2011-03-15	2011	1	Explosions/Remote violence	Shelling/artillery/missile attack	Al Shabaab		2	12	Eastern Africa	Somalia	Banadir	Banadir		Mogadishu	2.0414	45.3337	2	Crisis Watch	Other	15 March Al Shabaab attacks against govt and AU bases triggered heavy shelling of militant-controlled areas; casualties on both sides including civilians.	0	1552577538	SOM
5322184	706	SOM7019	7019	2011-03-15	2011	1	Explosions/Remote violence	Shelling/artillery/missile attack	Al Shabaab		2	12	Eastern Africa	Somalia	Banadir	Banadir		Wardhigley	2.0549	45.33	1	Local Source	Local	Around 8 mortar rounds were reportedly fired by AS forces at Villa Somalia in the afternoon of 15/03. 3 of the rounds landed in residential areas or in the compound of Radio Mogadishu killing 3 civilians and injuring 6 others. Several rounds landed in Villa Somalia without making any casualties. AMISOM/TFG forces reportedly responded by firing in the direction of Bakara market. Two of their round…	8	1561469335	SOM
5322182	706	SOM7016	7016	2011-03-15	2011	1	Battles	Armed clash	Al Shabaab		2	12	Eastern Africa	Somalia	Banadir	Banadir		Bondhere	2.0456	45.34	1	Local Source	Local	Heavy clashes and shelling exchanges between TFG/AMISOM soldiers and AS fighters were reported to have occurred simultaneously at the Juba, post and telecommunication ministry building and old seaport areas. This was shortly after AS fighters had launched an attack against the TFG/AMISOM positions. Initial reports indicate that six TFG soldiers were killed and two others injured. Casualties from …	0	1561469335	SOM
5322185	706	SOM7020	7020	2011-03-15	2011	1	Battles	Armed clash	Al Shabaab		2	12	Eastern Africa	Somalia	Banadir	Banadir		Hodan	2.0333	45.35	1	Local Source	Local	Armed clashes and shelling between TFG/AMISOM soldiers and AS were reported at Talex neighborhood in Hodan district after AS fighters attacked TFG/AMISOM positions. Casualties could not be established.	0	1561469335	SOM
5322181	706	SOM7015	7015	2011-03-15	2011	1	Battles	Armed clash	Al Shabaab		2	12	Eastern Africa	Somalia	Banadir	Banadir		Abdul-Aziz	2.0405	45.36	1	Local Source	Local	Heavy clashes and shelling exchanges between TFG/AMISOM soldiers and AS fighters were reported to have occurred simultaneously at the Juba, post and telecommunication ministry building and old seaport areas. This was shortly after AS fighters had launched an attack against the TFG/AMISOM positions. Initial reports indicate that six TFG soldiers were killed and two others injured. Casualties from …	0	1561469335	SOM
5322186	706	SOM7021	7021	2011-03-15	2011	1	Explosions/Remote violence	Shelling/artillery/missile attack	AMISOM: African Union Mission in Somalia (2007-)		8	28	Eastern Africa	Somalia	Lower Shabelle	Afgooye		Madiina	2.2204	45.2259	1	Local Source	Local	AS allegedly fired an 82 mm mortar round which landed about 500 meters away from the OPD area north-east of the AMISOM Force headquarters. No casualties were reported.	0	1561469335	SOM
5322183	706	SOM7018	7018	2011-03-15	2011	1	Explosions/Remote violence	Shelling/artillery/missile attack	Military Forces of Somalia (2004-2012)		1	12	Eastern Africa	Somalia	Banadir	Banadir		Wadajir	2.0462	45.3341	1	Local Source	Local	A mortar round believed to have been fired by AS landed 10 meters away from Villa Baidoa (TFG military HQ) near the perimeter wall. The TFG President has reportedly been staying in Villa Baidoa since the offensive started. No casualties were reported.	0	1561469335	SOM
4948116	706	SOM7017	7017	2011-03-15	2011	1	Explosions/Remote violence	Shelling/artillery/missile attack	Military Forces of Somalia (2004-2012)	AMISOM: African Union Mission in Somalia (2007-)	1	12	Eastern Africa	Somalia	Banadir	Banadir		Mogadishu	2.0414	45.3337	2	Crisis Watch	Other	15 March Al Shabaab attacks against govt and AU bases triggered heavy shelling of militant-controlled areas; casualties on both sides including civilians.	0	1552577538	SOM
5322184	706	SOM7019	7019	2011-03-15	2011	1	Explosions/Remote violence	Shelling/artillery/missile attack	Military Forces of Somalia (2004-2012)	AMISOM: African Union Mission in Somalia (2007-)	1	12	Eastern Africa	Somalia	Banadir	Banadir		Wardhigley	2.0549	45.33	1	Local Source	Local	Around 8 mortar rounds were reportedly fired by AS forces at Villa Somalia in the afternoon of 15/03. 3 of the rounds landed in residential areas or in the compound of Radio Mogadishu killing 3 civilians and injuring 6 others. Several rounds landed in Villa Somalia without making any casualties. AMISOM/TFG forces reportedly responded by firing in the direction of Bakara market. Two of their round…	8	1561469335	SOM
5322182	706	SOM7016	7016	2011-03-15	2011	1	Battles	Armed clash	Military Forces of Somalia (2004-2012)	AMISOM: African Union Mission in Somalia (2007-)	1	12	Eastern Africa	Somalia	Banadir	Banadir		Bondhere	2.0456	45.34	1	Local Source	Local	Heavy clashes and shelling exchanges between TFG/AMISOM soldiers and AS fighters were reported to have occurred simultaneously at the Juba, post and telecommunication ministry building and old seaport areas. This was shortly after AS fighters had launched an attack against the TFG/AMISOM positions. Initial reports indicate that six TFG soldiers were killed and two others injured. Casualties from …	0	1561469335	SOM
5322185	706	SOM7020	7020	2011-03-15	2011	1	Battles	Armed clash	Military Forces of Somalia (2004-2012)	AMISOM: African Union Mission in Somalia (2007-)	1	12	Eastern Africa	Somalia	Banadir	Banadir		Hodan	2.0333	45.35	1	Local Source	Local	Armed clashes and shelling between TFG/AMISOM soldiers and AS were reported at Talex neighborhood in Hodan district after AS fighters attacked TFG/AMISOM positions. Casualties could not be established.	0	1561469335	SOM
5322181	706	SOM7015	7015	2011-03-15	2011	1	Battles	Armed clash	Military Forces of Somalia (2004-2012)	AMISOM: African Union Mission in Somalia (2007-)	1	12	Eastern Africa	Somalia	Banadir	Banadir		Abdul-Aziz	2.0405	45.36	1	Local Source	Local	Heavy clashes and shelling exchanges between TFG/AMISOM soldiers and AS fighters were reported to have occurred simultaneously at the Juba, post and telecommunication ministry building and old seaport areas. This was shortly after AS fighters had launched an attack against the TFG/AMISOM positions. Initial reports indicate that six TFG soldiers were killed and two others injured. Casualties from …	0	1561469335	SOM
5322195	706	SOM7030	7030	2011-03-16	2011	1	Battles	Armed clash	Al Shabaab		2	23	Eastern Africa	Somalia	Gedo	Belet Xaawo		Dhamase	3.15	41.33	1	Local Source	Local	Armed clashes between AS forces and pro-TFG militia trained in Kenya have been reported in Dhamase (along the Kenyan border, north of Ceel-Waaq) and Buusaar (around 40km east of Ceel-Waaq on the road to Baardheere.	0	1561469335	SOM
5322193	706	SOM7028	7028	2011-03-16	2011	1	Battles	Armed clash	Al Shabaab		2	12	Eastern Africa	Somalia	Banadir	Banadir		Wardhigley	2.0549	45.33	1	Local Source	Local	AS militants launched a large scale attack against several TFG and AMISOM positions at around 22.00 on 16/03/2011. The clashes lasted more than 3 hours in some locations. Sheikh Abdul-Aziz Abu Musab, and AS Spokesman, declared to local medias after the attack that AS had captured several positions and killed a large number of TFG/AMISOM soldiers. This report was contradicted by the TFG Vice-Comma…	1	1561469335	SOM
5322192	706	SOM7027	7027	2011-03-16	2011	1	Battles	Armed clash	Al Shabaab		2	12	Eastern Africa	Somalia	Banadir	Banadir		Hodan	2.0333	45.35	1	Local Source	Local	AS militants launched a large scale attack against several TFG and AMISOM positions at around 22.00 on 16/03/2011. The clashes lasted more than 3 hours in some locations. Sheikh Abdul-Aziz Abu Musab, and AS Spokesman, declared to local medias after the attack that AS had captured several positions and killed a large number of TFG/AMISOM soldiers. This report was contradicted by the TFG Vice-Comma…	1	1561469335	SOM
5322191	706	SOM7026	7026	2011-03-16	2011	1	Battles	Armed clash	Al Shabaab		2	12	Eastern Africa	Somalia	Banadir	Banadir		Hawl Wadaag	2.048	45.32	1	Local Source	Local	AS militants launched a large scale attack against several TFG and AMISOM positions at around 22.00 on 16/03/2011. The clashes lasted more than 3 hours in some locations. Sheikh Abdul-Aziz Abu Musab, and AS Spokesman, declared to local medias after the attack that AS had captured several positions and killed a large number of TFG/AMISOM soldiers. This report was contradicted by the TFG Vice-Comma…	2	1561469335	SOM
5322190	706	SOM7025	7025	2011-03-16	2011	1	Battles	Armed clash	Al Shabaab		2	12	Eastern Africa	Somalia	Banadir	Banadir		Dharkenley	2.0095	45.25	1	Local Source	Local	AS militants launched a large scale attack against several TFG and AMISOM positions at around 22.00 on 16/03/2011. The clashes lasted more than 3 hours in some locations. Sheikh Abdul-Aziz Abu Musab, and AS Spokesman, declared to local medias after the attack that AS had captured several positions and killed a large number of TFG/AMISOM soldiers. This report was contradicted by the TFG Vice-Comma…	2	1561469335	SOM
5322189	706	SOM7024	7024	2011-03-16	2011	1	Battles	Armed clash	Al Shabaab		2	12	Eastern Africa	Somalia	Banadir	Banadir		Bondhere	2.0456	45.34	1	Local Source	Local	AS militants launched a large scale attack against several TFG and AMISOM positions at around 22.00 on 16/03/2011. The clashes lasted more than 3 hours in some locations. Sheikh Abdul-Aziz Abu Musab, and AS Spokesman, declared to local medias after the attack that AS had captured several positions and killed a large number of TFG/AMISOM soldiers. This report was contradicted by the TFG Vice-Comma…	2	1561469335	SOM
5322188	706	SOM7023	7023	2011-03-16	2011	1	Battles	Armed clash	Al Shabaab		2	12	Eastern Africa	Somalia	Banadir	Banadir		Abdul-Aziz	2.0405	45.36	1	Local Source	Local	AS militants launched a large scale attack against several TFG and AMISOM positions at around 22.00 on 16/03/2011. The clashes lasted more than 3 hours in some locations. Sheikh Abdul-Aziz Abu Musab, and AS Spokesman, declared to local medias after the attack that AS had captured several positions and killed a large number of TFG/AMISOM soldiers. This report was contradicted by the TFG Vice-Comma…	2	1561469335	SOM
5322194	706	SOM7029	7029	2011-03-16	2011	1	Battles	Armed clash	Al Shabaab		2	23	Eastern Africa	Somalia	Gedo	Ceel Waaq		Busaar	2.6778	41.3254	1	Local Source	Local	Armed clashes between AS forces and pro-TFG militia trained in Kenya have been reported in Dhamase (along the Kenyan border, north of Ceel-Waaq) and Buusaar (around 40km east of Ceel-Waaq on the road to Baardheere.	0	1561469335	SOM
5322187	706	SOM7022	7022	2011-03-16	2011	1	Strategic developments	Change to group/activity	Unidentified Armed Group (Somalia)		3	30	Eastern Africa	Somalia	Gedo	Baardheere		Faafax Dhuun	2.2059	41.6249	1	Local Source	Local	Movement of forces: Unconfirmed reports indicate that 400 militias trained in Kenya have moved from Ceel Waaq to Faafax Dhuun in Baardheere District. The movements of the pro-TFG militias are probably part of a general attempt to seize control of Baardheere town.	0	1561469335	SOM
5322195	706	SOM7030	7030	2011-03-16	2011	1	Battles	Armed clash	Unidentified Armed Group (Somalia)		3	23	Eastern Africa	Somalia	Gedo	Belet Xaawo		Dhamase	3.15	41.33	1	Local Source	Local	Armed clashes between AS forces and pro-TFG militia trained in Kenya have been reported in Dhamase (along the Kenyan border, north of Ceel-Waaq) and Buusaar (around 40km east of Ceel-Waaq on the road to Baardheere.	0	1561469335	SOM
5322193	706	SOM7028	7028	2011-03-16	2011	1	Battles	Armed clash	Military Forces of Somalia (2004-2012)	AMISOM: African Union Mission in Somalia (2007-)	1	12	Eastern Africa	Somalia	Banadir	Banadir		Wardhigley	2.0549	45.33	1	Local Source	Local	AS militants launched a large scale attack against several TFG and AMISOM positions at around 22.00 on 16/03/2011. The clashes lasted more than 3 hours in some locations. Sheikh Abdul-Aziz Abu Musab, and AS Spokesman, declared to local medias after the attack that AS had captured several positions and killed a large number of TFG/AMISOM soldiers. This report was contradicted by the TFG Vice-Comma…	1	1561469335	SOM
5322192	706	SOM7027	7027	2011-03-16	2011	1	Battles	Armed clash	Military Forces of Somalia (2004-2012)	AMISOM: African Union Mission in Somalia (2007-)	1	12	Eastern Africa	Somalia	Banadir	Banadir		Hodan	2.0333	45.35	1	Local Source	Local	AS militants launched a large scale attack against several TFG and AMISOM positions at around 22.00 on 16/03/2011. The clashes lasted more than 3 hours in some locations. Sheikh Abdul-Aziz Abu Musab, and AS Spokesman, declared to local medias after the attack that AS had captured several positions and killed a large number of TFG/AMISOM soldiers. This report was contradicted by the TFG Vice-Comma…	1	1561469335	SOM
5322191	706	SOM7026	7026	2011-03-16	2011	1	Battles	Armed clash	Military Forces of Somalia (2004-2012)	AMISOM: African Union Mission in Somalia (2007-)	1	12	Eastern Africa	Somalia	Banadir	Banadir		Hawl Wadaag	2.048	45.32	1	Local Source	Local	AS militants launched a large scale attack against several TFG and AMISOM positions at around 22.00 on 16/03/2011. The clashes lasted more than 3 hours in some locations. Sheikh Abdul-Aziz Abu Musab, and AS Spokesman, declared to local medias after the attack that AS had captured several positions and killed a large number of TFG/AMISOM soldiers. This report was contradicted by the TFG Vice-Comma…	2	1561469335	SOM
5322190	706	SOM7025	7025	2011-03-16	2011	1	Battles	Armed clash	Military Forces of Somalia (2004-2012)	AMISOM: African Union Mission in Somalia (2007-)	1	12	Eastern Africa	Somalia	Banadir	Banadir		Dharkenley	2.0095	45.25	1	Local Source	Local	AS militants launched a large scale attack against several TFG and AMISOM positions at around 22.00 on 16/03/2011. The clashes lasted more than 3 hours in some locations. Sheikh Abdul-Aziz Abu Musab, and AS Spokesman, declared to local medias after the attack that AS had captured several positions and killed a large number of TFG/AMISOM soldiers. This report was contradicted by the TFG Vice-Comma…	2	1561469335	SOM
5322189	706	SOM7024	7024	2011-03-16	2011	1	Battles	Armed clash	Military Forces of Somalia (2004-2012)	AMISOM: African Union Mission in Somalia (2007-)	1	12	Eastern Africa	Somalia	Banadir	Banadir		Bondhere	2.0456	45.34	1	Local Source	Local	AS militants launched a large scale attack against several TFG and AMISOM positions at around 22.00 on 16/03/2011. The clashes lasted more than 3 hours in some locations. Sheikh Abdul-Aziz Abu Musab, and AS Spokesman, declared to local medias after the attack that AS had captured several positions and killed a large number of TFG/AMISOM soldiers. This report was contradicted by the TFG Vice-Comma…	2	1561469335	SOM
5322188	706	SOM7023	7023	2011-03-16	2011	1	Battles	Armed clash	Military Forces of Somalia (2004-2012)	AMISOM: African Union Mission in Somalia (2007-)	1	12	Eastern Africa	Somalia	Banadir	Banadir		Abdul-Aziz	2.0405	45.36	1	Local Source	Local	AS militants launched a large scale attack against several TFG and AMISOM positions at around 22.00 on 16/03/2011. The clashes lasted more than 3 hours in some locations. Sheikh Abdul-Aziz Abu Musab, and AS Spokesman, declared to local medias after the attack that AS had captured several positions and killed a large number of TFG/AMISOM soldiers. This report was contradicted by the TFG Vice-Comma…	2	1561469335	SOM
5322194	706	SOM7029	7029	2011-03-16	2011	1	Battles	Armed clash	Unidentified Armed Group (Somalia)		3	23	Eastern Africa	Somalia	Gedo	Ceel Waaq		Busaar	2.6778	41.3254	1	Local Source	Local	Armed clashes between AS forces and pro-TFG militia trained in Kenya have been reported in Dhamase (along the Kenyan border, north of Ceel-Waaq) and Buusaar (around 40km east of Ceel-Waaq on the road to Baardheere.	0	1561469335	SOM
5322197	706	SOM7032	7032	2011-03-17	2011	1	Battles	Armed clash	Al Shabaab		2	12	Eastern Africa	Somalia	Banadir	Banadir		Hodan	2.0333	45.35	1	Local Source	Local	AS militants launched an attack against TFG and AMISOM forces based in the above mentioned areas around midnight. Shooting and artillery fire ensued. 3 civilians were reportedly killed while 5 others injured.	3	1561469335	SOM
5322197	706	SOM7032	7032	2011-03-17	2011	1	Battles	Armed clash	Military Forces of Somalia (2004-2012)	AMISOM: African Union Mission in Somalia (2007-)	1	12	Eastern Africa	Somalia	Banadir	Banadir		Hodan	2.0333	45.35	1	Local Source	Local	AS militants launched an attack against TFG and AMISOM forces based in the above mentioned areas around midnight. Shooting and artillery fire ensued. 3 civilians were reportedly killed while 5 others injured.	3	1561469335	SOM
5322198	706	SOM7033	7033	2011-03-17	2011	1	Battles	Armed clash	Rahanweyn Clan Militia (Somalia)		4	44	Eastern Africa	Somalia	Gedo	Luuq		Luuq	3.8	42.5446	1	Local Source	Local	A clash is reported to have occurred between some of the militias composing the allied forces currently fighting against the AS in Gedo Region. The clash was the result of a dispute over the ownership of a technical. The clash opposed militias from Rahaweyn and Marehan clans. Seven militiamen were arrested. The incident resulted in the injury of 9 fighters.	0	1561469335	SOM
5322198	706	SOM7033	7033	2011-03-17	2011	1	Battles	Armed clash	Marehan Clan Militia (Somalia)		4	44	Eastern Africa	Somalia	Gedo	Luuq		Luuq	3.8	42.5446	1	Local Source	Local	A clash is reported to have occurred between some of the militias composing the allied forces currently fighting against the AS in Gedo Region. The clash was the result of a dispute over the ownership of a technical. The clash opposed militias from Rahaweyn and Marehan clans. Seven militiamen were arrested. The incident resulted in the injury of 9 fighters.	0	1561469335	SOM
5322199	706	SOM7034	7034	2011-03-17	2011	1	Strategic developments	Looting/property destruction	Unidentified Armed Group (Somalia)		3	37	Eastern Africa	Somalia	Bari	Qardho		Qardho	9.5069	49.0861	1	Local Source	Local	A truck belonging to a WFP contractor and carrying WFP food towards Garowe was hijacked by nomadic armed men around 25-30 km north of Qardho on the main toad to Garowe. A report indicates that local police managed to recover cargo items but a local media announced that food had been shared by nomad families who complain that they are not targeted by food aid.	0	1561469335	SOM
5322199	706	SOM7034	7034	2011-03-17	2011	1	Strategic developments	Looting/property destruction	Civilians (International)		7	37	Eastern Africa	Somalia	Bari	Qardho		Qardho	9.5069	49.0861	1	Local Source	Local	A truck belonging to a WFP contractor and carrying WFP food towards Garowe was hijacked by nomadic armed men around 25-30 km north of Qardho on the main toad to Garowe. A report indicates that local police managed to recover cargo items but a local media announced that food had been shared by nomad families who complain that they are not targeted by food aid.	0	1561469335	SOM
5322196	706	SOM7031	7031	2011-03-17	2011	1	Protests	Peaceful protest	Protesters (Somalia)	Women (Somalia)	6	60	Eastern Africa	Somalia	Mudug	Gaalkacyo		Gaalkacyo	6.7697	47.4308	1	Local Source	Local	A group of twenty to twenty five IDP women from the Halabokhad IDP settlement came to a UN compound in Galkacyo North to protest against the IDP leadership in their settlement, which they claimed deprives them of their rightful assistance they should receive from aid agencies.	0	1561469335	SOM
5322201	706	SOM7036	7036	2011-03-18	2011	1	Battles	Armed clash	Al Shabaab		2	12	Eastern Africa	Somalia	Banadir	Banadir		Hodan	2.0333	45.35	1	Local Source	Local	AS militants launched a hit-and-run attack against TFG/AMISOM forces based in the above mentioned areas. The confrontation lasted only a few minutes and resulted in the killing of one civilian and the injury of 5 others.	1	1561469335	SOM
5322203	706	SOM7038	7038	2011-03-18	2011	1	Violence against civilians	Attack	Bantu Clan Militia (Somalia)		4	47	Eastern Africa	Somalia	Middle Shabelle	Jowhar		Buulo-Waray	2.8424	45.5457	2	Local Source	Local	The village of Buulo-Waray (7km north of Jowhar, on the eastern bank of the Shabelle River) was for the most part destroyed by fire as a result of a dispute between two families. Unconfirmed reports indicate that the conflicting families put fire at the house of the other but were unable to control the fire that expended to the whole village. Most of the houses in the village have been reportedly…	0	1561469335	SOM
5322203	706	SOM7038	7038	2011-03-18	2011	1	Violence against civilians	Attack	Civilians (Somalia)		7	47	Eastern Africa	Somalia	Middle Shabelle	Jowhar		Buulo-Waray	2.8424	45.5457	2	Local Source	Local	The village of Buulo-Waray (7km north of Jowhar, on the eastern bank of the Shabelle River) was for the most part destroyed by fire as a result of a dispute between two families. Unconfirmed reports indicate that the conflicting families put fire at the house of the other but were unable to control the fire that expended to the whole village. Most of the houses in the village have been reportedly…	0	1561469335	SOM
5322201	706	SOM7036	7036	2011-03-18	2011	1	Battles	Armed clash	Military Forces of Somalia (2004-2012)	AMISOM: African Union Mission in Somalia (2007-)	1	12	Eastern Africa	Somalia	Banadir	Banadir		Hodan	2.0333	45.35	1	Local Source	Local	AS militants launched a hit-and-run attack against TFG/AMISOM forces based in the above mentioned areas. The confrontation lasted only a few minutes and resulted in the killing of one civilian and the injury of 5 others.	1	1561469335	SOM
5322200	706	SOM7035	7035	2011-03-18	2011	1	Battles	Armed clash	Military Forces of Somalia (2004-2012)		1	11	Eastern Africa	Somalia	Banadir	Banadir		Xamar Weyne	2.0337	45.34	1	Local Source	Local	TFG police and TFG soldiers manning a check-point clashed among each other close to the Afar-Irdood junction, possibly after an argument over issues related to khat. One soldier was reportedly killed and one bystander injured.	1	1561469335	SOM
5322200	706	SOM7035	7035	2011-03-18	2011	1	Battles	Armed clash	Military Forces of Somalia (2004-2012)		1	11	Eastern Africa	Somalia	Banadir	Banadir		Xamar Weyne	2.0337	45.34	1	Local Source	Local	TFG police and TFG soldiers manning a check-point clashed among each other close to the Afar-Irdood junction, possibly after an argument over issues related to khat. One soldier was reportedly killed and one bystander injured.	1	1561469335	SOM
5322202	706	SOM7037	7037	2011-03-18	2011	1	Battles	Armed clash	Military Forces of Somalia (2004-2012) Puntland Security Force		1	13	Eastern Africa	Somalia	Mudug	Gaalkacyo		Gaalkacyo	6.7697	47.4308	1	Local Source	Local	Exchange of fire was reported in the evening of 18/03/2011 close to the Green Line in Galkacyo North. The incident is believed to be opposing Puntland security forces and local residents of the area who oppose the policy of clearing of illegal business, in particular alcohol sellers. Disorder continued in the morning of 19/03/2011 and at around 11.25 a hand-grenade was reportedly thrown against P…	0	1561469335	SOM
5322202	706	SOM7037	7037	2011-03-18	2011	1	Battles	Armed clash	Unidentified Armed Group (Somalia)		3	13	Eastern Africa	Somalia	Mudug	Gaalkacyo		Gaalkacyo	6.7697	47.4308	1	Local Source	Local	Exchange of fire was reported in the evening of 18/03/2011 close to the Green Line in Galkacyo North. The incident is believed to be opposing Puntland security forces and local residents of the area who oppose the policy of clearing of illegal business, in particular alcohol sellers. Disorder continued in the morning of 19/03/2011 and at around 11.25 a hand-grenade was reportedly thrown against P…	0	1561469335	SOM
5322204	706	SOM7039	7039	2011-03-19	2011	1	Strategic developments	Non-violent transfer of territory	Al Shabaab		2	20	Eastern Africa	Somalia	Gedo	Ceel Waaq		El Wak	2.7352	41.0177	1	Local Source	Local	Kenya-trained troops reportedly withdrew from Buusaar frontline and returned to Ceel-Waaq following a disagreement among their commanders. AS fighters are said to have promptly moved in to occupy the positions left by their opponents.	0	1561469335	SOM
5322208	706	SOM7043	7043	2011-03-19	2011	1	Battles	Armed clash	Al Shabaab		2	12	Eastern Africa	Somalia	Banadir	Banadir		Hodan	2.0333	45.35	1	Local Source	Local	AS launched an attack against AMISOM/TFG forces in the above mentioned area and retreated after 1 hour of fighting. No civilian casualties were reported.	0	1561469335	SOM
5322211	706	SOM7046	7046	2011-03-19	2011	1	Explosions/Remote violence	Grenade	Unidentified Armed Group (Somalia)		3	37	Eastern Africa	Somalia	Lower Shabelle	Afgooye		Madiina	2.2204	45.2259	1	Local Source	Local	Unidentified assaulter(s) threw two hand grenades against an INGO compound. One of the grenade fell in the INGO compound and slightly injured 2 of guards, the other fell in the neighboring house injuring 7 persons.	0	1561469335	SOM
5322211	706	SOM7046	7046	2011-03-19	2011	1	Explosions/Remote violence	Grenade	Civilians (Somalia)		7	37	Eastern Africa	Somalia	Lower Shabelle	Afgooye		Madiina	2.2204	45.2259	1	Local Source	Local	Unidentified assaulter(s) threw two hand grenades against an INGO compound. One of the grenade fell in the INGO compound and slightly injured 2 of guards, the other fell in the neighboring house injuring 7 persons.	0	1561469335	SOM
5322206	706	SOM7041	7041	2011-03-19	2011	1	Protests	Peaceful protest	Protesters (Somalia)		6	60	Eastern Africa	Somalia	Banadir	Banadir		Xamar Weyne	2.0337	45.34	1	Local Source	Local	Hundreds of residents gathered in SYL square to participate to a pro-TFG demonstration organized by the Banadir Regional Militia. Several DCs from Banadir Region, the Governor and the Mogadishu Mayor were part of the event.	0	1561469335	SOM
5322210	706	SOM7045	7045	2011-03-19	2011	1	Explosions/Remote violence	Remote explosive/landmine/IED	Unidentified Armed Group (Somalia)		3	37	Eastern Africa	Somalia	Mudug	Gaalkacyo		Gaalkacyo	6.7697	47.4308	1	Local Source	Local	It has been reported that the General Prosecutor of the Puntland States Court had been targeted by a RCIED on 19/03 in Galkacyo North. Four of his body guards were injured and his vehicle was slightly damaged. The attack was followed immediately by a security operation resulting in the arrest of around 50 persons. Most of them were released shortly after.	0	1561469335	SOM
5322210	706	SOM7045	7045	2011-03-19	2011	1	Explosions/Remote violence	Remote explosive/landmine/IED	Civilians (Somalia)		7	37	Eastern Africa	Somalia	Mudug	Gaalkacyo		Gaalkacyo	6.7697	47.4308	1	Local Source	Local	It has been reported that the General Prosecutor of the Puntland States Court had been targeted by a RCIED on 19/03 in Galkacyo North. Four of his body guards were injured and his vehicle was slightly damaged. The attack was followed immediately by a security operation resulting in the arrest of around 50 persons. Most of them were released shortly after.	0	1561469335	SOM
5322208	706	SOM7043	7043	2011-03-19	2011	1	Battles	Armed clash	Military Forces of Somalia (2004-2012)	AMISOM: African Union Mission in Somalia (2007-)	1	12	Eastern Africa	Somalia	Banadir	Banadir		Hodan	2.0333	45.35	1	Local Source	Local	AS launched an attack against AMISOM/TFG forces in the above mentioned area and retreated after 1 hour of fighting. No civilian casualties were reported.	0	1561469335	SOM
5322205	706	SOM7040	7040	2011-03-19	2011	1	Strategic developments	Non-violent transfer of territory	Militia (Ahmed Madoobe)		3	30	Eastern Africa	Somalia	Gedo	Baardheere		Faafax Dhuun	2.2059	41.6249	1	Local Source	Local	Militia (Ahmed Madoobe) are said to have taken over Faafax-Dhuun village from AS. AS had withdrawn and did not oppose any resistance.	0	1561469335	SOM
5322207	706	SOM7042	7042	2011-03-19	2011	1	Strategic developments	Change to group/activity	Military Forces of Ethiopia (1995-2018)		8	80	Eastern Africa	Somalia	Gedo	Luuq		Luuq	3.8	42.5446	1	Local Source	Local	Movement of forces: Most of the Ethiopian forces that had supported the offensive of the ASWJ and pro-TFG militias are said to have withdrawn from Luuq and Bulo-Xawo and moved back to Ethiopian territory. Only a skeleton force is said to remain in Luuq.	0	1561469335	SOM
5322209	706	SOM7044	7044	2011-03-19	2011	1	Battles	Armed clash	Military Forces of Somalia (2004-2012) Puntland Security Force		1	13	Eastern Africa	Somalia	Mudug	Gaalkacyo		Gaalkacyo	6.7697	47.4308	1	Local Source	Local	Exchange of fire was reported in the evening of 18/03/2011 close to the Green Line in Galkacyo North. The incident is believed to be opposing Puntland security forces and local residents of the area who oppose the policy of clearing of illegal business, in particular alcohol sellers. Disorder continued in the morning of 19/03/2011 and at around 11.25 a hand-grenade was reportedly thrown against P…	0	1561469335	SOM
5322209	706	SOM7044	7044	2011-03-19	2011	1	Battles	Armed clash	Unidentified Armed Group (Somalia)		3	13	Eastern Africa	Somalia	Mudug	Gaalkacyo		Gaalkacyo	6.7697	47.4308	1	Local Source	Local	Exchange of fire was reported in the evening of 18/03/2011 close to the Green Line in Galkacyo North. The incident is believed to be opposing Puntland security forces and local residents of the area who oppose the policy of clearing of illegal business, in particular alcohol sellers. Disorder continued in the morning of 19/03/2011 and at around 11.25 a hand-grenade was reportedly thrown against P…	0	1561469335	SOM
5322214	706	SOM7049	7049	2011-03-20	2011	1	Battles	Armed clash	Al Shabaab		2	12	Eastern Africa	Somalia	Banadir	Banadir		Hodan	2.0333	45.35	1	Local Source	Local	Armed clash and mortar shelling between TFG/AMISOM soldiers and AS fighters occurred at the frontline positions of Milk Factory, African village and near Shaqalaha (AU Base) in Hodan District. One person was reportedly killed while two TFG soldiers and four civilians were injured. Casualties on AS side could not be established.	1	1561469335	SOM
5322215	706	SOM7050	7050	2011-03-20	2011	1	Battles	Armed clash	Al Shabaab		2	23	Eastern Africa	Somalia	Lower Juba	Afmadow		Dhobley	0.4063	41.0124	1	Local Source	Local	A fierce fighting opposed a combination of militias (Ahmed Madoobe forces plus militias trained in Isiolo/Kenya) and AS troops in Dhoobley after the allied militias attempted to expel AS from the town. The confrontation involved exchange of artillery fire and lasted up to the morning of 21/03. The allied militias are said to have been retreated back to Kenya after having temporarily controlled at…	0	1561469335	SOM
5322213	706	SOM7048	7048	2011-03-20	2011	1	Protests	Peaceful protest	Protesters (Somalia)		6	60	Eastern Africa	Somalia	Banadir	Banadir		Shangaani	2.0377	45.35	1	Local Source	Local	Hundreds of people gathered for a peaceful demonstration in support of the TFG offensive and its recent successes against AS. The Mogadishu Mayor delivered a speech and requested the local community to provide any assistances required by the TFG forces.	0	1561469335	SOM
5322217	706	SOM7052	7052	2011-03-20	2011	1	Violence against civilians	Attack	Unidentified Armed Group (Somalia)		3	37	Eastern Africa	Somalia	Mudug	Gaalkacyo		Garsoor	6.7662	47.4279	1	Local Source	Local	Hussein Ali Dude, a traditional elder from the Reer Bicid Yahan sub-clan of Majerteen was shot dead by unknown masked men when leaving the Ramadan Mosque in Garsoor Village. He was one of the most prominent peace activists in Galkacyo and Chairman of the Mudug security committee.	0	1561469335	SOM
5322217	706	SOM7052	7052	2011-03-20	2011	1	Violence against civilians	Attack	Civilians (Somalia)		7	37	Eastern Africa	Somalia	Mudug	Gaalkacyo		Garsoor	6.7662	47.4279	1	Local Source	Local	Hussein Ali Dude, a traditional elder from the Reer Bicid Yahan sub-clan of Majerteen was shot dead by unknown masked men when leaving the Ramadan Mosque in Garsoor Village. He was one of the most prominent peace activists in Galkacyo and Chairman of the Mudug security committee.	0	1561469335	SOM
5322214	706	SOM7049	7049	2011-03-20	2011	1	Battles	Armed clash	Military Forces of Somalia (2004-2012)	AMISOM: African Union Mission in Somalia (2007-)	1	12	Eastern Africa	Somalia	Banadir	Banadir		Hodan	2.0333	45.35	1	Local Source	Local	Armed clash and mortar shelling between TFG/AMISOM soldiers and AS fighters occurred at the frontline positions of Milk Factory, African village and near Shaqalaha (AU Base) in Hodan District. One person was reportedly killed while two TFG soldiers and four civilians were injured. Casualties on AS side could not be established.	1	1561469335	SOM
5322216	706	SOM7051	7051	2011-03-20	2011	1	Battles	Armed clash	Pirates (Somalia)		3	34	Eastern Africa	Somalia	Bari	Iskushuban		Baargaal	11.2826	51.0777	1	Local Source	Local	Local elders and youth groups of the Siwaqron sub-clan of Majerteen ordered local pirates to leave Bargal town. An exchange of fire was reported between the two groups on 18/03.	0	1561469335	SOM
5322216	706	SOM7051	7051	2011-03-20	2011	1	Battles	Armed clash	Siwaqron Clan Militia (Somalia)		4	34	Eastern Africa	Somalia	Bari	Iskushuban		Baargaal	11.2826	51.0777	1	Local Source	Local	Local elders and youth groups of the Siwaqron sub-clan of Majerteen ordered local pirates to leave Bargal town. An exchange of fire was reported between the two groups on 18/03.	0	1561469335	SOM
5322215	706	SOM7050	7050	2011-03-20	2011	1	Battles	Armed clash	Militia (Ahmed Madoobe)	Isiolo Militia	3	23	Eastern Africa	Somalia	Lower Juba	Afmadow		Dhobley	0.4063	41.0124	1	Local Source	Local	A fierce fighting opposed a combination of militias (Ahmed Madoobe forces plus militias trained in Isiolo/Kenya) and AS troops in Dhoobley after the allied militias attempted to expel AS from the town. The confrontation involved exchange of artillery fire and lasted up to the morning of 21/03. The allied militias are said to have been retreated back to Kenya after having temporarily controlled at…	0	1561469335	SOM
5322212	706	SOM7047	7047	2011-03-20	2011	1	Protests	Peaceful protest	Protesters (Somalia)		6	60	Eastern Africa	Somalia	Woqooyi Galbeed	Hargeysa		Hargeysa	9.5598	44.0668	1	Local Source	Local	Truck drivers demonstrated outside the Ministry of Interior in protest against a decision by the Mayor and the Municipality of Hargeisa to introduce a new law that requires all trucks operating in Hargeisa to relocate to areas outside the town. Police arrested some the demonstrators while others were forced to disperse.	0	1561469335	SOM
5322219	706	SOM7054	7054	2011-03-21	2011	1	Battles	Armed clash	Al Shabaab		2	12	Eastern Africa	Somalia	Banadir	Banadir		Hodan	2.0333	45.35	1	Local Source	Local	AS launched an attack against AMISOM/TFG force based in the above mentioned areas. One civilian was killed and 7 others were injured.	1	1561469335	SOM
5322218	706	SOM7053	7053	2011-03-21	2011	1	Battles	Armed clash	Al Shabaab		2	12	Eastern Africa	Somalia	Banadir	Banadir		Hawl Wadaag	2.048	45.32	1	Local Source	Local	AMISOM and TFG forces fired several rounds against AS bases in the above mentioned areas. As a result of the incident one employee of the Somali University was killed while 9 civilians were injured including one guard from the Somali University.	0	1561469335	SOM
5322220	706	SOM7055	7055	2011-03-21	2011	1	Battles	Armed clash	Al Shabaab		2	23	Eastern Africa	Somalia	Lower Juba	Afmadow		Dhobley	0.4063	41.0124	1	Local Source	Local	A fierce fighting opposed a combination of militias (Ahmed Madoobe forces plus militias trained in Isiolo/Kenya) and AS troops in Dhoobley after the allied militias attempted to expel AS from the town. The confrontation involved exchange of artillery fire and lasted up to the morning of 21/03. The allied militias are said to have been retreated back to Kenya after having temporarily controlled at…	0	1561469335	SOM
5322219	706	SOM7054	7054	2011-03-21	2011	1	Battles	Armed clash	Military Forces of Somalia (2004-2012)	AMISOM: African Union Mission in Somalia (2007-)	1	12	Eastern Africa	Somalia	Banadir	Banadir		Hodan	2.0333	45.35	1	Local Source	Local	AS launched an attack against AMISOM/TFG force based in the above mentioned areas. One civilian was killed and 7 others were injured.	1	1561469335	SOM
5322218	706	SOM7053	7053	2011-03-21	2011	1	Battles	Armed clash	Military Forces of Somalia (2004-2012)	AMISOM: African Union Mission in Somalia (2007-)	1	12	Eastern Africa	Somalia	Banadir	Banadir		Hawl Wadaag	2.048	45.32	1	Local Source	Local	AMISOM and TFG forces fired several rounds against AS bases in the above mentioned areas. As a result of the incident one employee of the Somali University was killed while 9 civilians were injured including one guard from the Somali University.	0	1561469335	SOM
5322221	706	SOM7056	7056	2011-03-21	2011	1	Battles	Armed clash	Unidentified Clan Militia (Somalia)		4	44	Eastern Africa	Somalia	Woqooyi Galbeed	Hargeysa		Hargeysa	9.5598	44.0668	1	Local Source	Local	Reports from Hargeisa Hospital confirm that 10 people were brought in for treatment with injuries sustained during a fight between two clans in Dhaboolaq, around 20 km west of Hargeisa, The fighting was sparked by water issues. The police have been deployed in the area to help calm the situation.	0	1561469335	SOM
5322221	706	SOM7056	7056	2011-03-21	2011	1	Battles	Armed clash	Unidentified Clan Militia (Somalia)		4	44	Eastern Africa	Somalia	Woqooyi Galbeed	Hargeysa		Hargeysa	9.5598	44.0668	1	Local Source	Local	Reports from Hargeisa Hospital confirm that 10 people were brought in for treatment with injuries sustained during a fight between two clans in Dhaboolaq, around 20 km west of Hargeisa, The fighting was sparked by water issues. The police have been deployed in the area to help calm the situation.	0	1561469335	SOM
5322220	706	SOM7055	7055	2011-03-21	2011	1	Battles	Armed clash	Militia (Ahmed Madoobe)	Isiolo Militia	3	23	Eastern Africa	Somalia	Lower Juba	Afmadow		Dhobley	0.4063	41.0124	1	Local Source	Local	A fierce fighting opposed a combination of militias (Ahmed Madoobe forces plus militias trained in Isiolo/Kenya) and AS troops in Dhoobley after the allied militias attempted to expel AS from the town. The confrontation involved exchange of artillery fire and lasted up to the morning of 21/03. The allied militias are said to have been retreated back to Kenya after having temporarily controlled at…	0	1561469335	SOM
5322222	706	SOM7057	7057	2011-03-21	2011	1	Violence against civilians	Attack	Unidentified Armed Group (Somalia)		3	37	Eastern Africa	Somalia	Mudug	Gaalkacyo		Gaalkacyo	6.7697	47.4308	1	Local Source	Local	A civilian truck was reportedly ambushed by armed men close to Galinsoor. The incident resulted in the death of 2 passengers and the injury of 3 others. Recent reports had indicated that several militia groups had defected from Galmudug training camps and had moved towards Galinsoor.	2	1561469335	SOM
5322222	706	SOM7057	7057	2011-03-21	2011	1	Violence against civilians	Attack	Civilians (Somalia)		7	37	Eastern Africa	Somalia	Mudug	Gaalkacyo		Gaalkacyo	6.7697	47.4308	1	Local Source	Local	A civilian truck was reportedly ambushed by armed men close to Galinsoor. The incident resulted in the death of 2 passengers and the injury of 3 others. Recent reports had indicated that several militia groups had defected from Galmudug training camps and had moved towards Galinsoor.	2	1561469335	SOM
5322230	706	SOM7065	7065	2011-03-22	2011	1	Explosions/Remote violence	Remote explosive/landmine/IED	Al Shabaab		2	12	Eastern Africa	Somalia	Gedo	Doolow		Bula Hawa	3.9276	41.8742	1	Local Source	Local	A RCIED exploded in Bulo-Xawo targeting pro-TFG officers stationed in their new command post located in the main police station. The device was reportedly planted in front of the police station. 4 officers were injured including Col. Gacamey (Marehan), District Police Commissioner in charge of Bulo-Xawo, and his deputy. 2 other civilians were reported wounded when pro-TFG militias opened fire aft…	0	1561469335	SOM
5322229	706	SOM7064	7064	2011-03-22	2011	1	Battles	Armed clash	Al Shabaab		2	12	Eastern Africa	Somalia	Banadir	Banadir		Waaberi	2.0195	45.31	1	Local Source	Local	A stray round reportedly fired from AS controlled-areas landed in the above mentioned area injuring 5 civilians and 2 TFG military personnel.	0	1561469335	SOM
5322231	706	SOM7066	7066	2011-03-22	2011	1	Battles	Armed clash	Al Shabaab		2	23	Eastern Africa	Somalia	Lower Juba	Afmadow		Dhobley	0.4063	41.0124	1	Local Source	Local	Reports indicate that several AS commanders may have been killed or wounded by artillery fire during the fighting in Dhoobley in the week of 21/03. Multiple sources confirm the death of Ali Bashir (Habr Gedir/Ayr), Regional Finance Officer for Lower Juba. The Governor of Lower Juba Region and the local commander of Dhoobley are said to have been slightly injured while another operation commander …	0	1561469335	SOM
5322228	706	SOM7063	7063	2011-03-22	2011	1	Battles	Armed clash	Al Shabaab		2	12	Eastern Africa	Somalia	Banadir	Banadir		Hawl Wadaag	2.048	45.32	1	Local Source	Local	TFG forces together with AMISOM launched early in the morning an offensive against AS bases along the existing demarcation line in central Mogadishu. The attack was followed by heavy fighting and artillery fire. 10 persons were reported killed and 20 others injured according to ambulance sources. TFG military deputy Commander Gen. Abdikarim Yusuf Aden a.k.a Dheba-Badan told the reporters that a h…	0	1561469335	SOM
5322227	706	SOM7062	7062	2011-03-22	2011	1	Battles	Armed clash	Al Shabaab		2	12	Eastern Africa	Somalia	Banadir	Banadir		Bondhere	2.0456	45.34	1	Local Source	Local	TFG forces together with AMISOM launched early in the morning an offensive against AS bases along the existing demarcation line in central Mogadishu. The attack was followed by heavy fighting and artillery fire. 10 persons were reported killed and 20 others injured according to ambulance sources. TFG military deputy Commander Gen. Abdikarim Yusuf Aden a.k.a Dheba-Badan told the reporters that a h…	0	1561469335	SOM
5322230	706	SOM7065	7065	2011-03-22	2011	1	Explosions/Remote violence	Remote explosive/landmine/IED	Military Forces of Somalia (2004-2012)		1	12	Eastern Africa	Somalia	Gedo	Doolow		Bula Hawa	3.9276	41.8742	1	Local Source	Local	A RCIED exploded in Bulo-Xawo targeting pro-TFG officers stationed in their new command post located in the main police station. The device was reportedly planted in front of the police station. 4 officers were injured including Col. Gacamey (Marehan), District Police Commissioner in charge of Bulo-Xawo, and his deputy. 2 other civilians were reported wounded when pro-TFG militias opened fire aft…	0	1561469335	SOM
5322223	706	SOM7058	7058	2011-03-22	2011	1	Strategic developments	Change to group/activity	ASWJ: Ahlu Sunna Wal Jamaa		3	30	Eastern Africa	Somalia	Gedo	Baardheere		Bardera	2.3385	42.2843	1	Local Source	Local	Movement of forces: ASWJ forces based in Luuq have reportedly moved towards Garbaharey and Baardheere districts where they are believed to be about to engage AS forces. Militias loyal to ex-TFG members from Bay and Bakool have remained in Luuq.	0	1561469335	SOM
5322224	706	SOM7059	7059	2011-03-22	2011	1	Strategic developments	Change to group/activity	ASWJ: Ahlu Sunna Wal Jamaa		3	30	Eastern Africa	Somalia	Gedo	Garbahaarey		Garbahaarey	3.328	42.2199	1	Local Source	Local	Movement of forces: ASWJ forces based in Luuq have reportedly moved towards Garbaharey and Baardheere districts where they are believed to be about to engage AS forces. Militias loyal to ex-TFG members from Bay and Bakool have remained in Luuq.	0	1561469335	SOM
5322229	706	SOM7064	7064	2011-03-22	2011	1	Battles	Armed clash	Military Forces of Somalia (2004-2012)		1	12	Eastern Africa	Somalia	Banadir	Banadir		Waaberi	2.0195	45.31	1	Local Source	Local	A stray round reportedly fired from AS controlled-areas landed in the above mentioned area injuring 5 civilians and 2 TFG military personnel.	0	1561469335	SOM
5322231	706	SOM7066	7066	2011-03-22	2011	1	Battles	Armed clash	Unidentified Armed Group (Somalia)		3	23	Eastern Africa	Somalia	Lower Juba	Afmadow		Dhobley	0.4063	41.0124	1	Local Source	Local	Reports indicate that several AS commanders may have been killed or wounded by artillery fire during the fighting in Dhoobley in the week of 21/03. Multiple sources confirm the death of Ali Bashir (Habr Gedir/Ayr), Regional Finance Officer for Lower Juba. The Governor of Lower Juba Region and the local commander of Dhoobley are said to have been slightly injured while another operation commander …	0	1561469335	SOM
5322228	706	SOM7063	7063	2011-03-22	2011	1	Battles	Armed clash	Military Forces of Somalia (2004-2012)	AMISOM: African Union Mission in Somalia (2007-)	1	12	Eastern Africa	Somalia	Banadir	Banadir		Hawl Wadaag	2.048	45.32	1	Local Source	Local	TFG forces together with AMISOM launched early in the morning an offensive against AS bases along the existing demarcation line in central Mogadishu. The attack was followed by heavy fighting and artillery fire. 10 persons were reported killed and 20 others injured according to ambulance sources. TFG military deputy Commander Gen. Abdikarim Yusuf Aden a.k.a Dheba-Badan told the reporters that a h…	0	1561469335	SOM
5322227	706	SOM7062	7062	2011-03-22	2011	1	Battles	Armed clash	Military Forces of Somalia (2004-2012)	AMISOM: African Union Mission in Somalia (2007-)	1	12	Eastern Africa	Somalia	Banadir	Banadir		Bondhere	2.0456	45.34	1	Local Source	Local	TFG forces together with AMISOM launched early in the morning an offensive against AS bases along the existing demarcation line in central Mogadishu. The attack was followed by heavy fighting and artillery fire. 10 persons were reported killed and 20 others injured according to ambulance sources. TFG military deputy Commander Gen. Abdikarim Yusuf Aden a.k.a Dheba-Badan told the reporters that a h…	0	1561469335	SOM
5322225	706	SOM7060	7060	2011-03-22	2011	1	Strategic developments	Headquarters or base established	SSC: Sool, Sanaag and Cayn Militia		3	30	Eastern Africa	Somalia	Togdheer	Owdweyne		Hagoogane	9.62	45.13	2	Local Source	Local	SSC established another base near Hagoogane. Some believe that this could be the prelude to other clashes in Buuhoodle District.	0	1561469335	SOM
5322226	706	SOM7061	7061	2011-03-22	2011	1	Strategic developments	Change to group/activity	SSC: Sool, Sanaag and Cayn Militia		3	30	Eastern Africa	Somalia	Togdheer	Owdweyne		Kalshaale	9.41	45.06	2	Local Source	Local	Movement of forces: SSC militias reportedly brought new forces in Kalshaale	0	1561469335	SOM
5322235	706	SOM7071	7071	2011-03-23	2011	1	Battles	Armed clash	Al Shabaab		2	12	Eastern Africa	Somalia	Gedo	Luuq		Bohol Bashiir	3.6023	42.6454	2	Local Source	Local	A fighting between AS and TFG forces took place in Bohol Bashir area (between Luuq and Berdale districts) after AS forces based in Yurkud ambushed TFG forces injuring one soldier.	0	1561469335	SOM
5322236	706	SOM7072	7072	2011-03-23	2011	1	Battles	Armed clash	Al Shabaab		2	12	Eastern Africa	Somalia	Banadir	Banadir		Hawl Wadaag	2.048	45.32	1	Local Source	Local	Several artillery rounds believed to have been fired from TFG-controlled areas, possibly as a response to AS artillery fire, fell in Bakara Market close to the Baidoa bus stand. At least 5 civilians were killed and 21 others injured.	5	1561469335	SOM
5553117	706	SOM7070	7070	2011-03-23	2011	1	Battles	Armed clash	Al Shabaab		2	23	Eastern Africa	Somalia	Gedo	Luuq		Luuq	3.8	42.5446	1	Local Source	Local	AS are reported to have launched an attack against ex-TFG militias camped in Luuq town. The attack was preceded by mortar fire. Fierce fighting was reported around 3 to 4 km south of Luuq on the road to Baidoa. AS retreated after the attack.	0	1563229347	SOM
5322237	706	SOM7073	7073	2011-03-23	2011	1	Battles	Armed clash	Al Shabaab		2	28	Eastern Africa	Somalia	Lower Juba	Afmadow		Dhobley	0.4063	41.0124	1	Local Source	Local	Open sources reported that a contingent of General Service Unit (GSU) officers crossed into Somalia and killed 12 AS militants in a clash at the Liboi border. This was after the militants allegedly fired to the Kenyan side and damaged a water tank at a GSU camp on the main border. The GSU officers took this as a provocation and pursued AS inside Somalia. No casualty was reported on the Kenyan side	0	1561469335	SOM
5322232	706	SOM7067	7067	2011-03-23	2011	1	Strategic developments	Non-violent transfer of territory	Al Shabaab		2	20	Eastern Africa	Somalia	Bakool	Rab Dhuure		Rab Dhuure	4.3535	43.1616	1	Local Source	Local	Unconfirmed report indicates that AS reinforced their positions in Rabdhuure District. Preparations for fighting are reported to be under way. TFG is currently believed to have a weak presence in Bakool region as most of the forces originally stationed in Yeed were relocated to the battle fronts in Gedo.	0	1561469335	SOM
5322233	706	SOM7069	7069	2011-03-23	2011	1	Protests	Peaceful protest	Protesters (Somalia)		6	60	Eastern Africa	Somalia	Banadir	Banadir		Xamar Weyne	2.0337	45.34	1	Local Source	Local	Mohamed Dheeres supporters organized a third demonstration from his residence in Shangani District up to Hawo Tako Monument (close to National Theatre) in Xamar-Weyne District.	0	1561469335	SOM
5322235	706	SOM7071	7071	2011-03-23	2011	1	Battles	Armed clash	Military Forces of Somalia (2004-2012)		1	12	Eastern Africa	Somalia	Gedo	Luuq		Bohol Bashiir	3.6023	42.6454	2	Local Source	Local	A fighting between AS and TFG forces took place in Bohol Bashir area (between Luuq and Berdale districts) after AS forces based in Yurkud ambushed TFG forces injuring one soldier.	0	1561469335	SOM
5322236	706	SOM7072	7072	2011-03-23	2011	1	Battles	Armed clash	Military Forces of Somalia (2004-2012)		1	12	Eastern Africa	Somalia	Banadir	Banadir		Hawl Wadaag	2.048	45.32	1	Local Source	Local	Several artillery rounds believed to have been fired from TFG-controlled areas, possibly as a response to AS artillery fire, fell in Bakara Market close to the Baidoa bus stand. At least 5 civilians were killed and 21 others injured.	5	1561469335	SOM
5553117	706	SOM7070	7070	2011-03-23	2011	1	Battles	Armed clash	Unidentified Armed Group (Somalia)	Former Military Forces of Somalia (2004-2012)	3	23	Eastern Africa	Somalia	Gedo	Luuq		Luuq	3.8	42.5446	1	Local Source	Local	AS are reported to have launched an attack against ex-TFG militias camped in Luuq town. The attack was preceded by mortar fire. Fierce fighting was reported around 3 to 4 km south of Luuq on the road to Baidoa. AS retreated after the attack.	0	1563229347	SOM
5322238	706	SOM7074	7074	2011-03-23	2011	1	Battles	Armed clash	Unidentified Armed Group (Somalia)		3	38	Eastern Africa	Somalia	Mudug	Gaalkacyo		Gaalkacyo	6.7697	47.4308	1	Local Source	Local	A member of the armed escort of 2 humanitarian agencies travelling on the Galkacyo-Galinsoor road was reportedly shot and wounded at the leg by militia manning an illegal check-point in Dagaari. The incident happened after the agencies convoy had stopped at the check point and the militias had started clearing the road. Reasons for the shooting are unknown. The check-point was later removed and m…	0	1561469335	SOM
5322238	706	SOM7074	7074	2011-03-23	2011	1	Battles	Armed clash	Private Security Forces (Somalia)		8	38	Eastern Africa	Somalia	Mudug	Gaalkacyo		Gaalkacyo	6.7697	47.4308	1	Local Source	Local	A member of the armed escort of 2 humanitarian agencies travelling on the Galkacyo-Galinsoor road was reportedly shot and wounded at the leg by militia manning an illegal check-point in Dagaari. The incident happened after the agencies convoy had stopped at the check point and the militias had started clearing the road. Reasons for the shooting are unknown. The check-point was later removed and m…	0	1561469335	SOM
5322237	706	SOM7073	7073	2011-03-23	2011	1	Battles	Armed clash	Military Forces of Kenya (2002-2013) General Service Unit		8	28	Eastern Africa	Somalia	Lower Juba	Afmadow		Dhobley	0.4063	41.0124	1	Local Source	Local	Open sources reported that a contingent of General Service Unit (GSU) officers crossed into Somalia and killed 12 AS militants in a clash at the Liboi border. This was after the militants allegedly fired to the Kenyan side and damaged a water tank at a GSU camp on the main border. The GSU officers took this as a provocation and pursued AS inside Somalia. No casualty was reported on the Kenyan side	0	1561469335	SOM
5322242	706	SOM7078	7078	2011-03-24	2011	1	Explosions/Remote violence	Grenade	Al Shabaab		2	27	Eastern Africa	Somalia	Lower Shabelle	Marka		Ceelasha	1.6833	44.7166	2	Local Source	Local	A hand grenade was reportedly thrown at AS militants in Ceelasha Biyaha triggering indiscriminate fire by AS against nearby civilians. Accounts differ on the number of victims (from 4 AS militants wounded and 1 civilian killed plus 3 wounded, to 3 AS killed and 10 wounded plus 4 civilians killed and 7 wounded). One report indicates that a prominent AS commander, Sheikh Mohamed Abu Yahya, had been…	3	1561469335	SOM
5322241	706	SOM7077	7077	2011-03-24	2011	1	Battles	Armed clash	Al Shabaab		2	23	Eastern Africa	Somalia	Lower Shabelle	Marka		Ceelasha	1.6833	44.7166	2	Local Source	Local	A hand grenade was reportedly thrown at AS militants in Ceelasha Biyaha triggering indiscriminate fire by AS against nearby civilians. Accounts differ on the number of victims (from 4 AS militants wounded and 1 civilian killed plus 3 wounded, to 3 AS killed and 10 wounded plus 4 civilians killed and 7 wounded). One report indicates that a prominent AS commander, Sheikh Mohamed Abu Yahya, had been…	0	1561469335	SOM
5322239	706	SOM7075	7075	2011-03-24	2011	1	Protests	Peaceful protest	Protesters (Somalia)		6	60	Eastern Africa	Somalia	Banadir	Banadir		Daynile	2.0581	45.3003	1	Local Source	Local	Hundreds of people held a peaceful demonstration close to the ex-Ministry of Defence in support of TFG and AMISOM forces. People were requesting AMISOM and TFG force to help them return to their houses in Dayniile district and remove AS from those areas.	0	1561469335	SOM
5322242	706	SOM7078	7078	2011-03-24	2011	1	Explosions/Remote violence	Grenade	Civilians (Somalia)		7	27	Eastern Africa	Somalia	Lower Shabelle	Marka		Ceelasha	1.6833	44.7166	2	Local Source	Local	A hand grenade was reportedly thrown at AS militants in Ceelasha Biyaha triggering indiscriminate fire by AS against nearby civilians. Accounts differ on the number of victims (from 4 AS militants wounded and 1 civilian killed plus 3 wounded, to 3 AS killed and 10 wounded plus 4 civilians killed and 7 wounded). One report indicates that a prominent AS commander, Sheikh Mohamed Abu Yahya, had been…	3	1561469335	SOM
4947636	706	SOM7079	7079	2011-03-24	2011	1	Battles	Armed clash	Unidentified Armed Group (Somalia)		3	38	Eastern Africa	Somalia	Lower Juba	Afmadow		Afmadow	0.5172	42.071	2	Crisis Watch	Other	Fighting intensified in towns bordering Ethiopia and Kenya, with unconfirmed reports 24 March that Kenyan troops crossed border, engaged in fighting.	0	1552577538	SOM
4947636	706	SOM7079	7079	2011-03-24	2011	1	Battles	Armed clash	Military Forces of Kenya (2002-2013)		8	38	Eastern Africa	Somalia	Lower Juba	Afmadow		Afmadow	0.5172	42.071	2	Crisis Watch	Other	Fighting intensified in towns bordering Ethiopia and Kenya, with unconfirmed reports 24 March that Kenyan troops crossed border, engaged in fighting.	0	1552577538	SOM
5322240	706	SOM7076	7076	2011-03-24	2011	1	Battles	Armed clash	Unidentified Armed Group (Somalia)		3	13	Eastern Africa	Somalia	Lower Shabelle	Afgooye		Madiina	2.2204	45.2259	1	Local Source	Local	2 unidentified young men armed with pistols shot and killed a TFG soldier sitting in front of his house. The perpetrators managed to escape.	0	1561469335	SOM
5322240	706	SOM7076	7076	2011-03-24	2011	1	Battles	Armed clash	Military Forces of Somalia (2004-2012)		1	13	Eastern Africa	Somalia	Lower Shabelle	Afgooye		Madiina	2.2204	45.2259	1	Local Source	Local	2 unidentified young men armed with pistols shot and killed a TFG soldier sitting in front of his house. The perpetrators managed to escape.	0	1561469335	SOM
5322241	706	SOM7077	7077	2011-03-24	2011	1	Battles	Armed clash	Unidentified Armed Group (Somalia)		3	23	Eastern Africa	Somalia	Lower Shabelle	Marka		Ceelasha	1.6833	44.7166	2	Local Source	Local	A hand grenade was reportedly thrown at AS militants in Ceelasha Biyaha triggering indiscriminate fire by AS against nearby civilians. Accounts differ on the number of victims (from 4 AS militants wounded and 1 civilian killed plus 3 wounded, to 3 AS killed and 10 wounded plus 4 civilians killed and 7 wounded). One report indicates that a prominent AS commander, Sheikh Mohamed Abu Yahya, had been…	0	1561469335	SOM
5322246	706	SOM7083	7083	2011-03-25	2011	1	Battles	Armed clash	Al Shabaab		2	12	Eastern Africa	Somalia	Banadir	Banadir		Hodan	2.0333	45.35	1	Local Source	Local	AS forces launched an attack against TFG forces at the above mentioned area. 3 civilians were reportedly injured. AS forces retreated.	0	1561469335	SOM
5322245	706	SOM7082	7082	2011-03-25	2011	1	Battles	Armed clash	Al Shabaab		2	12	Eastern Africa	Somalia	Banadir	Banadir		Hodan	2.0333	45.35	1	Local Source	Local	AS forces launched an attack against AMISOM/TFG positions in the evening and the following day early in the morning. The attack involved an exchange of artillery fire. 3 civilians were reportedly killed and 6 other injured.	1	1561469335	SOM
5322244	706	SOM7081	7081	2011-03-25	2011	1	Battles	Armed clash	Al Shabaab		2	12	Eastern Africa	Somalia	Banadir	Banadir		Hawl Wadaag	2.048	45.32	1	Local Source	Local	AS forces launched an attack against AMISOM/TFG positions in the evening and the following day early in the morning. The attack involved an exchange of artillery fire. 3 civilians were reportedly killed and 6 other injured.	2	1561469335	SOM
5322246	706	SOM7083	7083	2011-03-25	2011	1	Battles	Armed clash	Military Forces of Somalia (2004-2012)		1	12	Eastern Africa	Somalia	Banadir	Banadir		Hodan	2.0333	45.35	1	Local Source	Local	AS forces launched an attack against TFG forces at the above mentioned area. 3 civilians were reportedly injured. AS forces retreated.	0	1561469335	SOM
5322245	706	SOM7082	7082	2011-03-25	2011	1	Battles	Armed clash	Military Forces of Somalia (2004-2012)	AMISOM: African Union Mission in Somalia (2007-)	1	12	Eastern Africa	Somalia	Banadir	Banadir		Hodan	2.0333	45.35	1	Local Source	Local	AS forces launched an attack against AMISOM/TFG positions in the evening and the following day early in the morning. The attack involved an exchange of artillery fire. 3 civilians were reportedly killed and 6 other injured.	1	1561469335	SOM
5322244	706	SOM7081	7081	2011-03-25	2011	1	Battles	Armed clash	Military Forces of Somalia (2004-2012)	AMISOM: African Union Mission in Somalia (2007-)	1	12	Eastern Africa	Somalia	Banadir	Banadir		Hawl Wadaag	2.048	45.32	1	Local Source	Local	AS forces launched an attack against AMISOM/TFG positions in the evening and the following day early in the morning. The attack involved an exchange of artillery fire. 3 civilians were reportedly killed and 6 other injured.	2	1561469335	SOM
5322243	706	SOM7080	7080	2011-03-25	2011	1	Strategic developments	Non-violent transfer of territory	Militia (Anti-Al Shabaab)		3	30	Eastern Africa	Somalia	Gedo	Garbahaarey		Tuulo Barwaaqo	3.5019	42.1547	1	Local Source	Local	Anti-AS forces stationed in Bula Xawo were reported to have started moving towards Garbahaarey. They were reported to have arrived to Tulo Barwaqo (about 20 Km north west of Garbahaarey) on 25th April 2011. Tulo Barwaqo was taken without a fight.	0	1561469335	SOM
5322250	706	SOM7087	7087	2011-03-26	2011	1	Battles	Armed clash	Al Shabaab		2	23	Eastern Africa	Somalia	Gedo	Garbahaarey		Tuulo Barwaaqo	3.5019	42.1547	1	Local Source	Local	AS ambushed a convoy of anti-AS forces between Bula Xawo and Tulo Barwaqo. AS reportedly killed four anti-AS fighters and wounded four others. AS also reportedly captured a truck with unspecified supplies and a technical.	0	1561469335	SOM
5322249	706	SOM7086	7086	2011-03-26	2011	1	Battles	Armed clash	Al Shabaab		2	12	Eastern Africa	Somalia	Banadir	Banadir		Hodan	2.0333	45.35	1	Local Source	Local	AS forces launched an attack against AMISOM/TFG positions in the evening and the following day early in the morning. The attack involved an exchange of artillery fire. 3 civilians were reportedly killed and 6 other injured.	1	1561469335	SOM
5322248	706	SOM7085	7085	2011-03-26	2011	1	Battles	Armed clash	Al Shabaab		2	12	Eastern Africa	Somalia	Banadir	Banadir		Hawl Wadaag	2.048	45.32	1	Local Source	Local	AS forces launched an attack against AMISOM/TFG positions in the evening and the following day early in the morning. The attack involved an exchange of artillery fire. 3 civilians were reportedly killed and 6 other injured.	2	1561469335	SOM
5322252	706	SOM7090	7090	2011-03-26	2011	1	Violence against civilians	Attack	Unidentified Armed Group (Somalia)		3	37	Eastern Africa	Somalia	Banadir	Banadir		Yaaqshiid	2.0678	45.35	1	Local Source	Local	2 stray rounds landed in a residential area killing 3 civilians and injuring several others.	3	1561469335	SOM
5322252	706	SOM7090	7090	2011-03-26	2011	1	Violence against civilians	Attack	Civilians (Somalia)		7	37	Eastern Africa	Somalia	Banadir	Banadir		Yaaqshiid	2.0678	45.35	1	Local Source	Local	2 stray rounds landed in a residential area killing 3 civilians and injuring several others.	3	1561469335	SOM
5322247	706	SOM7084	7084	2011-03-26	2011	1	Strategic developments	Change to group/activity	Military Forces of Somaliland (2010-)		1	10	Eastern Africa	Somalia	Togdheer	Owdweyne		Kalshaale	9.41	45.06	2	Local Source	Local	Movement of forces: Media reports indicate that Somaliland forces in Kalshaale area have withdrawn to around 8km west of that location. This pull-out follows requests made by Dhulbahante elders in Buuhoodle the week before. Residents of Qorulugud (Habar-Jeclo clan) were reportedly very concerned by that decision thinking that it could allow an attack by SSC militias.	0	1561469335	SOM
5322251	706	SOM7089	7089	2011-03-26	2011	1	Violence against civilians	Attack	Military Forces of Somalia (2004-2012) Galkayo Administration		1	17	Eastern Africa	Somalia	Mudug	Gaalkacyo		Gaalkacyo	6.7697	47.4308	1	Local Source	Local	Security forces from the Galkacyo Municipality opened fire and killed two men driving on the main road of Galkacyo after they failed to adhere to an order to stop their vehicle. The victims were Marehan/Omar and Majerteen.	1	1561469335	SOM
5322251	706	SOM7089	7089	2011-03-26	2011	1	Violence against civilians	Attack	Civilians (Somalia)		7	17	Eastern Africa	Somalia	Mudug	Gaalkacyo		Gaalkacyo	6.7697	47.4308	1	Local Source	Local	Security forces from the Galkacyo Municipality opened fire and killed two men driving on the main road of Galkacyo after they failed to adhere to an order to stop their vehicle. The victims were Marehan/Omar and Majerteen.	1	1561469335	SOM
5322250	706	SOM7087	7087	2011-03-26	2011	1	Battles	Armed clash	Militia (Anti-Al Shabaab)		3	23	Eastern Africa	Somalia	Gedo	Garbahaarey		Tuulo Barwaaqo	3.5019	42.1547	1	Local Source	Local	AS ambushed a convoy of anti-AS forces between Bula Xawo and Tulo Barwaqo. AS reportedly killed four anti-AS fighters and wounded four others. AS also reportedly captured a truck with unspecified supplies and a technical.	0	1561469335	SOM
5322249	706	SOM7086	7086	2011-03-26	2011	1	Battles	Armed clash	Military Forces of Somalia (2004-2012)	AMISOM: African Union Mission in Somalia (2007-)	1	12	Eastern Africa	Somalia	Banadir	Banadir		Hodan	2.0333	45.35	1	Local Source	Local	AS forces launched an attack against AMISOM/TFG positions in the evening and the following day early in the morning. The attack involved an exchange of artillery fire. 3 civilians were reportedly killed and 6 other injured.	1	1561469335	SOM
5322248	706	SOM7085	7085	2011-03-26	2011	1	Battles	Armed clash	Military Forces of Somalia (2004-2012)	AMISOM: African Union Mission in Somalia (2007-)	1	12	Eastern Africa	Somalia	Banadir	Banadir		Hawl Wadaag	2.048	45.32	1	Local Source	Local	AS forces launched an attack against AMISOM/TFG positions in the evening and the following day early in the morning. The attack involved an exchange of artillery fire. 3 civilians were reportedly killed and 6 other injured.	2	1561469335	SOM
5322255	706	SOM7093	7093	2011-03-27	2011	1	Violence against civilians	Attack	Leelkayse Clan Militia (Somalia)		4	47	Eastern Africa	Somalia	Mudug	Gaalkacyo		Gaalkacyo	6.7697	47.4308	1	Local Source	Local	A Leelkase (Darood sub-clan) man was killed killed by a fellow clan member in an action related to clan revenge.	1	1561469335	SOM
5322255	706	SOM7093	7093	2011-03-27	2011	1	Violence against civilians	Attack	Civilians (Somalia)		7	47	Eastern Africa	Somalia	Mudug	Gaalkacyo		Gaalkacyo	6.7697	47.4308	1	Local Source	Local	A Leelkase (Darood sub-clan) man was killed killed by a fellow clan member in an action related to clan revenge.	1	1561469335	SOM
5322254	706	SOM7092	7092	2011-03-27	2011	1	Explosions/Remote violence	Remote explosive/landmine/IED	Unidentified Armed Group (Somalia)		3	37	Eastern Africa	Somalia	Bari	Bossaso		Bosaso	11.2842	49.1816	1	Local Source	Local	A delegation led by the Puntland Deputy Minister of Security and including 7 traditional elders from Dhahar was targeted by a RCIED when travelling between Karin and Yalho on the main road between Bossaso and Garowe. No casualties were reported. The delegation was moving back from Dhahar where it had been involved in the resolution of the local clan conflict between Osman Mohamud and Dubeys sub-c…	0	1561469335	SOM
5322254	706	SOM7092	7092	2011-03-27	2011	1	Explosions/Remote violence	Remote explosive/landmine/IED	Civilians (Somalia)		7	37	Eastern Africa	Somalia	Bari	Bossaso		Bosaso	11.2842	49.1816	1	Local Source	Local	A delegation led by the Puntland Deputy Minister of Security and including 7 traditional elders from Dhahar was targeted by a RCIED when travelling between Karin and Yalho on the main road between Bossaso and Garowe. No casualties were reported. The delegation was moving back from Dhahar where it had been involved in the resolution of the local clan conflict between Osman Mohamud and Dubeys sub-c…	0	1561469335	SOM
5322253	706	SOM7091	7091	2011-03-27	2011	1	Battles	Armed clash	Military Forces of Somalia (2004-2012)		1	11	Eastern Africa	Somalia	Banadir	Banadir		Xamar Weyne	2.0337	45.34	1	Local Source	Local	Two groups of TFG forces exchanged fire after arguing over the collection of illegal taxes from a local bus-stand. 2 civilians were reportedly killed and 2 other injured.	2	1561469335	SOM
5322253	706	SOM7091	7091	2011-03-27	2011	1	Battles	Armed clash	Military Forces of Somalia (2004-2012)		1	11	Eastern Africa	Somalia	Banadir	Banadir		Xamar Weyne	2.0337	45.34	1	Local Source	Local	Two groups of TFG forces exchanged fire after arguing over the collection of illegal taxes from a local bus-stand. 2 civilians were reportedly killed and 2 other injured.	2	1561469335	SOM
5322263	706	SOM7101	7101	2011-03-28	2011	1	Battles	Armed clash	Al Shabaab		2	23	Eastern Africa	Somalia	Hiraan	Belet Weyne		Belet Weyne	4.736	45.2043	1	Local Source	Local	AS forces reportedly attacked militias of the Shabelle Valley Alliance (SVA) based in Ceel Gaal and Ilkacadde area, around 12-15km north of Belet-Weyne. At least 6 combatants were killed and 10 other persons were wounded (civilians and combatants). Residents of Ilkacadde and Jawiil village were temporarily displaced. Tension remains high around Belet Weyne.	6	1561469335	SOM
5322260	706	SOM7098	7098	2011-03-28	2011	1	Battles	Armed clash	Al Shabaab		2	12	Eastern Africa	Somalia	Banadir	Banadir		Bondhere	2.0456	45.34	1	Local Source	Local	In an attempt to recapture positions lost in the morning AS forces launched an attack against AMISOM/TFG forces in the above mentioned areas. AS forces were repulsed after around an hour of fighting. Initial reports indicate that 1 TFG soldier was killed and 3 others injured. AS casualties are unknown.	1	1561469335	SOM
5322261	706	SOM7099	7099	2011-03-28	2011	1	Battles	Armed clash	Al Shabaab		2	12	Eastern Africa	Somalia	Banadir	Banadir		Shibis	2.0476	45.35	1	Local Source	Local	AMISOM/TFG forces launched a large scale attack against AS positions in the above mentioned districts. AS Operations Spokesman Sheikh Abdul-Aziz Abu Musab claimed and declared that AS had destroyed 1 technical and 1 truck belonging to AMISOM/TFG forces. TFG Banadir Region Spokesman Mohamed Abdullahi Arig on his side also claimed victory and asserted that AMISOM/TFG forces had captured new positio…	18	1561469335	SOM
5322259	706	SOM7097	7097	2011-03-28	2011	1	Battles	Armed clash	Al Shabaab		2	12	Eastern Africa	Somalia	Banadir	Banadir		Bondhere	2.0456	45.34	1	Local Source	Local	AMISOM/TFG forces launched a large scale attack against AS positions in the above mentioned districts. AS Operations Spokesman Sheikh Abdul-Aziz Abu Musab claimed and declared that AS had destroyed 1 technical and 1 truck belonging to AMISOM/TFG forces. TFG Banadir Region Spokesman Mohamed Abdullahi Arig on his side also claimed victory and asserted that AMISOM/TFG forces had captured new positio…	0	1561469335	SOM
5322263	706	SOM7101	7101	2011-03-28	2011	1	Battles	Armed clash	SVA: Shabelle Valley Alliance		3	23	Eastern Africa	Somalia	Hiraan	Belet Weyne		Belet Weyne	4.736	45.2043	1	Local Source	Local	AS forces reportedly attacked militias of the Shabelle Valley Alliance (SVA) based in Ceel Gaal and Ilkacadde area, around 12-15km north of Belet-Weyne. At least 6 combatants were killed and 10 other persons were wounded (civilians and combatants). Residents of Ilkacadde and Jawiil village were temporarily displaced. Tension remains high around Belet Weyne.	6	1561469335	SOM
5322256	706	SOM7094	7094	2011-03-28	2011	1	Strategic developments	Change to group/activity	ASWJ: Ahlu Sunna Wal Jamaa		3	30	Eastern Africa	Somalia	Gedo	Garbahaarey		Garbahaarey	3.328	42.2199	1	Local Source	Local	Movement of forces: ASWJ forces were reported moving on 28/03 from Luuq towards Garbaharey and were reported at the time to be planning an attack against AS in that town. They moved out of the area towards Dollow the following day without being engaged in any military action.	0	1561469335	SOM
5322260	706	SOM7098	7098	2011-03-28	2011	1	Battles	Armed clash	Military Forces of Somalia (2004-2012)	AMISOM: African Union Mission in Somalia (2007-)	1	12	Eastern Africa	Somalia	Banadir	Banadir		Bondhere	2.0456	45.34	1	Local Source	Local	In an attempt to recapture positions lost in the morning AS forces launched an attack against AMISOM/TFG forces in the above mentioned areas. AS forces were repulsed after around an hour of fighting. Initial reports indicate that 1 TFG soldier was killed and 3 others injured. AS casualties are unknown.	1	1561469335	SOM
5322261	706	SOM7099	7099	2011-03-28	2011	1	Battles	Armed clash	Military Forces of Somalia (2004-2012)	AMISOM: African Union Mission in Somalia (2007-)	1	12	Eastern Africa	Somalia	Banadir	Banadir		Shibis	2.0476	45.35	1	Local Source	Local	AMISOM/TFG forces launched a large scale attack against AS positions in the above mentioned districts. AS Operations Spokesman Sheikh Abdul-Aziz Abu Musab claimed and declared that AS had destroyed 1 technical and 1 truck belonging to AMISOM/TFG forces. TFG Banadir Region Spokesman Mohamed Abdullahi Arig on his side also claimed victory and asserted that AMISOM/TFG forces had captured new positio…	18	1561469335	SOM
5322259	706	SOM7097	7097	2011-03-28	2011	1	Battles	Armed clash	Military Forces of Somalia (2004-2012)	AMISOM: African Union Mission in Somalia (2007-)	1	12	Eastern Africa	Somalia	Banadir	Banadir		Bondhere	2.0456	45.34	1	Local Source	Local	AMISOM/TFG forces launched a large scale attack against AS positions in the above mentioned districts. AS Operations Spokesman Sheikh Abdul-Aziz Abu Musab claimed and declared that AS had destroyed 1 technical and 1 truck belonging to AMISOM/TFG forces. TFG Banadir Region Spokesman Mohamed Abdullahi Arig on his side also claimed victory and asserted that AMISOM/TFG forces had captured new positio…	0	1561469335	SOM
5322257	706	SOM7095	7095	2011-03-28	2011	1	Strategic developments	Other	Jalaaf Sub-Clan Militia (Somalia)		4	40	Eastern Africa	Somalia	Mudug	Gaalkacyo		Gaalkacyo	6.7697	47.4308	1	Local Source	Local	Non-violent activity: Local militias, mainly from the Jalaaf sub-clan, established five road blocks on the road between Galkacyo and Galinsoor. They are demanding tax amounting to around 5 USD from each vehicle passing through the area.	0	1561469335	SOM
5322258	706	SOM7096	7096	2011-03-28	2011	1	Protests	Peaceful protest	Protesters (Somalia)		6	60	Eastern Africa	Somalia	Togdheer	Owdweyne		Ood Weyne	9.407	45.0636	1	Local Source	Local	Dismissedgroup of teachersgathered in Ood-weyne to raise their complaints against the SL Minister of Education. Police dispersed the crowd and arrested the organizer of the demonstration Abdi Ahmed Essa alongside two other demonstrators. No one was injured during the protest.	0	1561469335	SOM
5322264	706	SOM7102	7102	2011-03-28	2011	1	Violence against civilians	Attack	Unidentified Armed Group (Somalia)		3	37	Eastern Africa	Somalia	Bari	Bossaso		Bossaso	11.2837	49.1806	1	Local Source	Local	Mr. Ahmed Salah Hairab, a traditional and religious elder from the Galgala community was assassinated in Bosasso in the evening of 28/03. The assassination was reportedly carried out as the elder was leaving a mosque in the center of Bosasso close to Juba Hotel by 2 unidentified masked men armed with pistols. The elder had been involved in negotiations between local authorities and Atoms group. H…	1	1561469335	SOM
5322264	706	SOM7102	7102	2011-03-28	2011	1	Violence against civilians	Attack	Civilians (Somalia)		7	37	Eastern Africa	Somalia	Bari	Bossaso		Bossaso	11.2837	49.1806	1	Local Source	Local	Mr. Ahmed Salah Hairab, a traditional and religious elder from the Galgala community was assassinated in Bosasso in the evening of 28/03. The assassination was reportedly carried out as the elder was leaving a mosque in the center of Bosasso close to Juba Hotel by 2 unidentified masked men armed with pistols. The elder had been involved in negotiations between local authorities and Atoms group. H…	1	1561469335	SOM
5322262	706	SOM7100	7100	2011-03-28	2011	1	Explosions/Remote violence	Grenade	Unidentified Armed Group (Somalia)		3	13	Eastern Africa	Somalia	Banadir	Banadir		Dharkenley	2.0095	45.25	1	Local Source	Local	Two hand grenades were simultaneously hurled at TFG soldiers patrolling Macmacanka and Tabakayo Madow areas. As a result, 3 persons including 1 soldier were reportedly injured. TFG soldiers captured one of the perpetrators but the others escaped.	0	1561469335	SOM
5322262	706	SOM7100	7100	2011-03-28	2011	1	Explosions/Remote violence	Grenade	Military Forces of Somalia (2004-2012)		1	13	Eastern Africa	Somalia	Banadir	Banadir		Dharkenley	2.0095	45.25	1	Local Source	Local	Two hand grenades were simultaneously hurled at TFG soldiers patrolling Macmacanka and Tabakayo Madow areas. As a result, 3 persons including 1 soldier were reportedly injured. TFG soldiers captured one of the perpetrators but the others escaped.	0	1561469335	SOM
5322269	706	SOM7107	7107	2011-03-29	2011	1	Explosions/Remote violence	Shelling/artillery/missile attack	Al Shabaab		2	23	Eastern Africa	Somalia	Gedo	Ceel Waaq		El Wak	2.7352	41.0177	1	Local Source	Local	Suspected AS elements launched a brief mortar attack against anti-AS militias in Ceel Waaq. One soldier from these militias was killed.	1	1561469335	SOM
5322268	706	SOM7106	7106	2011-03-29	2011	1	Explosions/Remote violence	Shelling/artillery/missile attack	Al Shabaab		2	12	Eastern Africa	Somalia	Banadir	Banadir		Bondhere	2.0456	45.34	1	Local Source	Local	AS fighters launched mortar attacks against TFG/AMISOM positions at the former Post and Telecommunications ministry building and in Juba hotel. Unconfirmed report indicates that three soldiers including two AMISOM soldiers were reportedly injured. Reports also indicate that an AMISOM water-tank truck was also damaged by mortar fragments.	0	1561469335	SOM
5322266	706	SOM7104	7104	2011-03-29	2011	1	Battles	Armed clash	Al Shabaab		2	12	Eastern Africa	Somalia	Banadir	Banadir		Daynile	2.0581	45.3003	1	Local Source	Local	Heavy clashes and shelling erupted after AS launched an attack against AMISOM/TFG positions in the above mentioned areas. AS forces retreated after an hour of fighting.	0	1561469335	SOM
5322267	706	SOM7105	7105	2011-03-29	2011	1	Battles	Armed clash	Al Shabaab		2	12	Eastern Africa	Somalia	Banadir	Banadir		Hodan	2.0333	45.35	1	Local Source	Local	Heavy clashes and shelling erupted after AS launched an attack against AMISOM/TFG positions in the above mentioned areas. AS forces retreated after an hour of fighting.	0	1561469335	SOM
5322269	706	SOM7107	7107	2011-03-29	2011	1	Explosions/Remote violence	Shelling/artillery/missile attack	Unidentified Armed Group (Somalia)		3	23	Eastern Africa	Somalia	Gedo	Ceel Waaq		El Wak	2.7352	41.0177	1	Local Source	Local	Suspected AS elements launched a brief mortar attack against anti-AS militias in Ceel Waaq. One soldier from these militias was killed.	1	1561469335	SOM
5322271	706	SOM7109	7109	2011-03-29	2011	1	Violence against civilians	Attack	Unidentified Armed Group (Somalia)		3	37	Eastern Africa	Somalia	Sool	Laas Caanood		Laascaanood	8.4774	47.3597	1	Local Source	Local	An unknown gunmen shot and seriously injured Mr. Jamac Abdi, a former Deputy Commander of the Laascanood Police Division. Another two civilians were injured by stray bullets. The Police conducted a security operation in Eastern parts of Laascanood following the shooting and arrested 6 people.	0	1561469335	SOM
5322271	706	SOM7109	7109	2011-03-29	2011	1	Violence against civilians	Attack	Civilians (Somalia)		7	37	Eastern Africa	Somalia	Sool	Laas Caanood		Laascaanood	8.4774	47.3597	1	Local Source	Local	An unknown gunmen shot and seriously injured Mr. Jamac Abdi, a former Deputy Commander of the Laascanood Police Division. Another two civilians were injured by stray bullets. The Police conducted a security operation in Eastern parts of Laascanood following the shooting and arrested 6 people.	0	1561469335	SOM
5322268	706	SOM7106	7106	2011-03-29	2011	1	Explosions/Remote violence	Shelling/artillery/missile attack	Military Forces of Somalia (2004-2012)	AMISOM: African Union Mission in Somalia (2007-)	1	12	Eastern Africa	Somalia	Banadir	Banadir		Bondhere	2.0456	45.34	1	Local Source	Local	AS fighters launched mortar attacks against TFG/AMISOM positions at the former Post and Telecommunications ministry building and in Juba hotel. Unconfirmed report indicates that three soldiers including two AMISOM soldiers were reportedly injured. Reports also indicate that an AMISOM water-tank truck was also damaged by mortar fragments.	0	1561469335	SOM
5322266	706	SOM7104	7104	2011-03-29	2011	1	Battles	Armed clash	Military Forces of Somalia (2004-2012)	AMISOM: African Union Mission in Somalia (2007-)	1	12	Eastern Africa	Somalia	Banadir	Banadir		Daynile	2.0581	45.3003	1	Local Source	Local	Heavy clashes and shelling erupted after AS launched an attack against AMISOM/TFG positions in the above mentioned areas. AS forces retreated after an hour of fighting.	0	1561469335	SOM
5322267	706	SOM7105	7105	2011-03-29	2011	1	Battles	Armed clash	Military Forces of Somalia (2004-2012)	AMISOM: African Union Mission in Somalia (2007-)	1	12	Eastern Africa	Somalia	Banadir	Banadir		Hodan	2.0333	45.35	1	Local Source	Local	Heavy clashes and shelling erupted after AS launched an attack against AMISOM/TFG positions in the above mentioned areas. AS forces retreated after an hour of fighting.	0	1561469335	SOM
5322265	706	SOM7103	7103	2011-03-29	2011	1	Battles	Armed clash	Military Forces of Somalia (2004-2012)		1	11	Eastern Africa	Somalia	Banadir	Banadir		Dharkenley	2.0095	45.25	1	Local Source	Local	TFG soldiers shot at each others in the area of Xoosh Junction over unknown reasons. One civilian was killed and two other persons including one soldier were allegedly injured.	1	1561469335	SOM
5322265	706	SOM7103	7103	2011-03-29	2011	1	Battles	Armed clash	Military Forces of Somalia (2004-2012)		1	11	Eastern Africa	Somalia	Banadir	Banadir		Dharkenley	2.0095	45.25	1	Local Source	Local	TFG soldiers shot at each others in the area of Xoosh Junction over unknown reasons. One civilian was killed and two other persons including one soldier were allegedly injured.	1	1561469335	SOM
5322270	706	SOM7108	7108	2011-03-29	2011	1	Violence against civilians	Attack	Unidentified Armed Group (Somalia)		3	37	Eastern Africa	Somalia	Mudug	Gaalkacyo		Gaalkacyo	6.7692	47.4306	1	Local Source	Local	Mr. Nuur Hirsi Hussein "Nurwal", a traditional elder and Chairman of the Security Committee of the Mudug traditional elders was shot in the evening by 2 young men and admitted with a serious head injury to Galkacyo Hospital. The victim died of his wound in the morning of 31/03. The motive behind the assassination is not clear yet. This is the fourth assassination in Garsoor settlement within the …	1	1561469335	SOM
5322270	706	SOM7108	7108	2011-03-29	2011	1	Violence against civilians	Attack	Civilians (Somalia)		7	37	Eastern Africa	Somalia	Mudug	Gaalkacyo		Gaalkacyo	6.7692	47.4306	1	Local Source	Local	Mr. Nuur Hirsi Hussein "Nurwal", a traditional elder and Chairman of the Security Committee of the Mudug traditional elders was shot in the evening by 2 young men and admitted with a serious head injury to Galkacyo Hospital. The victim died of his wound in the morning of 31/03. The motive behind the assassination is not clear yet. This is the fourth assassination in Garsoor settlement within the …	1	1561469335	SOM
5322275	706	SOM7113	7113	2011-03-30	2011	1	Explosions/Remote violence	Shelling/artillery/missile attack	Al Shabaab		2	12	Eastern Africa	Somalia	Banadir	Banadir		Hodan	2.0333	45.35	1	Local Source	Local	AS and AMISOM/TFG forces exchanged mortar fire followed by sporadic shooting in the above mentioned areas. Unconfirmed reports indicate that two stray mortar rounds believed to have been fired from TFG/AMISOM positions landed at Wadada Shirkadaha (Companys Road) in Bakara Market. According to various sources 2 to 3 persons were allegedly killed and 6 to 10 injured.	3	1561469335	SOM
5322274	706	SOM7112	7112	2011-03-30	2011	1	Explosions/Remote violence	Shelling/artillery/missile attack	Al Shabaab		2	12	Eastern Africa	Somalia	Banadir	Banadir		Hawl Wadaag	2.048	45.32	1	Local Source	Local	AS and AMISOM/TFG forces exchanged mortar fire followed by sporadic shooting in the above mentioned areas. Unconfirmed reports indicate that two stray mortar rounds believed to have been fired from TFG/AMISOM positions landed at Wadada Shirkadaha (Companys Road) in Bakara Market. According to various sources 2 to 3 persons were allegedly killed and 6 to 10 injured.	3	1561469335	SOM
5322276	706	SOM7114	7114	2011-03-30	2011	1	Explosions/Remote violence	Remote explosive/landmine/IED	Unidentified Armed Group (Somalia)		3	33	Eastern Africa	Somalia	Gedo	Luuq		Luuq	3.8	42.5446	1	Local Source	Local	An RCIED targeting anti-AS militia exploded close to the police station in Luuq. 3 persons including 2 militiamen were reportedly injured. 10 suspects were arrested in connection to the incident. Mohamed Abdi Kalil, Governor for Gedo Region, however denied that combatants had been killed by the blast.	0	1561469335	SOM
5322276	706	SOM7114	7114	2011-03-30	2011	1	Explosions/Remote violence	Remote explosive/landmine/IED	Militia (Anti-Al Shabaab)		3	33	Eastern Africa	Somalia	Gedo	Luuq		Luuq	3.8	42.5446	1	Local Source	Local	An RCIED targeting anti-AS militia exploded close to the police station in Luuq. 3 persons including 2 militiamen were reportedly injured. 10 suspects were arrested in connection to the incident. Mohamed Abdi Kalil, Governor for Gedo Region, however denied that combatants had been killed by the blast.	0	1561469335	SOM
5322278	706	SOM7116	7116	2011-03-30	2011	1	Violence against civilians	Attack	Unidentified Armed Group (Somalia)		3	37	Eastern Africa	Somalia	Sool	Laas Caanood		Laascaanood	8.4774	47.3597	1	Local Source	Local	The commander of Traffic Police in Sool region Aden Ahmed Yoonis was injured in an assassination attempt conducted by unknown gunmen. SL Police and Security Forces conducted a security operation following the shooting in the southern part of Laascanood and arrested 6 suspects. The suspects were subsequently transferred to Burao for further interrogation.	0	1561469335	SOM
5322278	706	SOM7116	7116	2011-03-30	2011	1	Violence against civilians	Attack	Civilians (Somalia)		7	37	Eastern Africa	Somalia	Sool	Laas Caanood		Laascaanood	8.4774	47.3597	1	Local Source	Local	The commander of Traffic Police in Sool region Aden Ahmed Yoonis was injured in an assassination attempt conducted by unknown gunmen. SL Police and Security Forces conducted a security operation following the shooting in the southern part of Laascanood and arrested 6 suspects. The suspects were subsequently transferred to Burao for further interrogation.	0	1561469335	SOM
5322277	706	SOM7115	7115	2011-03-30	2011	1	Explosions/Remote violence	Remote explosive/landmine/IED	Unidentified Armed Group (Somalia)		3	37	Eastern Africa	Somalia	Gedo	Luuq		Luuq	3.8	42.5446	1	Local Source	Local	A mine is reported to have detonated under a donkey-cart on a feeder road along the Juba River. The road is an alternate to the main Doolow-Luuq road. It is unclear if the owner of the donkey cart has been killed by the blast but all sources agree that the donkey is a confirmed fatality. The incident follows reports that AS had been laying mines to hinder movements of ASWJ and other militias in G…	0	1561469335	SOM
5322277	706	SOM7115	7115	2011-03-30	2011	1	Explosions/Remote violence	Remote explosive/landmine/IED	Civilians (Somalia)		7	37	Eastern Africa	Somalia	Gedo	Luuq		Luuq	3.8	42.5446	1	Local Source	Local	A mine is reported to have detonated under a donkey-cart on a feeder road along the Juba River. The road is an alternate to the main Doolow-Luuq road. It is unclear if the owner of the donkey cart has been killed by the blast but all sources agree that the donkey is a confirmed fatality. The incident follows reports that AS had been laying mines to hinder movements of ASWJ and other militias in G…	0	1561469335	SOM
5322275	706	SOM7113	7113	2011-03-30	2011	1	Explosions/Remote violence	Shelling/artillery/missile attack	Military Forces of Somalia (2004-2012)	AMISOM: African Union Mission in Somalia (2007-)	1	12	Eastern Africa	Somalia	Banadir	Banadir		Hodan	2.0333	45.35	1	Local Source	Local	AS and AMISOM/TFG forces exchanged mortar fire followed by sporadic shooting in the above mentioned areas. Unconfirmed reports indicate that two stray mortar rounds believed to have been fired from TFG/AMISOM positions landed at Wadada Shirkadaha (Companys Road) in Bakara Market. According to various sources 2 to 3 persons were allegedly killed and 6 to 10 injured.	3	1561469335	SOM
5322274	706	SOM7112	7112	2011-03-30	2011	1	Explosions/Remote violence	Shelling/artillery/missile attack	Military Forces of Somalia (2004-2012)	AMISOM: African Union Mission in Somalia (2007-)	1	12	Eastern Africa	Somalia	Banadir	Banadir		Hawl Wadaag	2.048	45.32	1	Local Source	Local	AS and AMISOM/TFG forces exchanged mortar fire followed by sporadic shooting in the above mentioned areas. Unconfirmed reports indicate that two stray mortar rounds believed to have been fired from TFG/AMISOM positions landed at Wadada Shirkadaha (Companys Road) in Bakara Market. According to various sources 2 to 3 persons were allegedly killed and 6 to 10 injured.	3	1561469335	SOM
5322273	706	SOM7111	7111	2011-03-30	2011	1	Battles	Armed clash	Military Forces of Somalia (2004-2012)		1	11	Eastern Africa	Somalia	Banadir	Banadir		Dharkenley	2.0095	45.25	1	Local Source	Local	Two groups of TFG forces exchanged fire in the evening of 30/03. The reason of the shooting is not known. One TFG soldier was reportedly killed, his body found on the spot of the incident the following morning.	1	1561469335	SOM
5322273	706	SOM7111	7111	2011-03-30	2011	1	Battles	Armed clash	Military Forces of Somalia (2004-2012)		1	11	Eastern Africa	Somalia	Banadir	Banadir		Dharkenley	2.0095	45.25	1	Local Source	Local	Two groups of TFG forces exchanged fire in the evening of 30/03. The reason of the shooting is not known. One TFG soldier was reportedly killed, his body found on the spot of the incident the following morning.	1	1561469335	SOM
5322272	706	SOM7110	7110	2011-03-30	2011	1	Riots	Violent demonstration	Rioters (Somalia)		5	50	Eastern Africa	Somalia	Togdheer	Buuhoodle		Buuhoodle	8.2516	46.3157	1	Local Source	Local	A delegation of Puntland composed of several ministers, MPs and prominent elders including Sultan Said Mohamed Garase reached Buuhoodle on Tuesday 29/03. The delegation was reportedly welcomed by local supporters but according to several medias also had to face a small demonstration in favor of Somaliland. Protesters were urging the delegation to leave back to Garowe and are said to have temporar…	0	1561469335	SOM
5322281	706	SOM7119	7119	2011-03-31	2011	1	Explosions/Remote violence	Shelling/artillery/missile attack	Al Shabaab		2	23	Eastern Africa	Somalia	Gedo	Luuq		Luuq	3.8	42.5446	1	Local Source	Local	AS forces attacked Luuq Town in the evening of 31/03. The attack concentrated on the southern side of the town close to the Juba River. Several RPG rounds were said to have been fired by AS. No casualties were reported. 10 to 14 persons are said to have been arrested by anti-AS forces in relation to that incident and the RCIED attack that occurred the day before.	0	1561469335	SOM
5322279	706	SOM7117	7117	2011-03-31	2011	1	Strategic developments	Non-violent transfer of territory	Al Shabaab		2	20	Eastern Africa	Somalia	Lower Shabelle	Marka		Marka	1.7131	44.7639	1	Local Source	Local	The compounds of several LNGOs and an INGO were reportedly occupied by AS militias on 31/03. Local sources indicate that AS have brought trucks to the compounds and are seizing all properties of the NGOs. At least 3 organizations are affected. Another INGO had taken the decision to close its operations in Lower Shabelle with an effective date of 31/03.	0	1561469335	SOM
5322281	706	SOM7119	7119	2011-03-31	2011	1	Explosions/Remote violence	Shelling/artillery/missile attack	Unidentified Armed Group (Somalia)		3	23	Eastern Africa	Somalia	Gedo	Luuq		Luuq	3.8	42.5446	1	Local Source	Local	AS forces attacked Luuq Town in the evening of 31/03. The attack concentrated on the southern side of the town close to the Juba River. Several RPG rounds were said to have been fired by AS. No casualties were reported. 10 to 14 persons are said to have been arrested by anti-AS forces in relation to that incident and the RCIED attack that occurred the day before.	0	1561469335	SOM
5322280	706	SOM7118	7118	2011-03-31	2011	1	Battles	Armed clash	Unidentified Armed Group (Somalia)		3	33	Eastern Africa	Somalia	Gedo	Doolow		Bula Hawa	3.9276	41.8742	1	Local Source	Local	A RCIED targeted a vehicle belonging to anti-AS militias based in Bulo-Xawo. Some sources indicate that several soldiers may have been killed or wounded but local officials denied having suffered any casualties. Shooting was heard after the explosion and arrests were made by anti-AS forces.	0	1561469335	SOM
5322280	706	SOM7118	7118	2011-03-31	2011	1	Battles	Armed clash	Militia (Anti-Al Shabaab)		3	33	Eastern Africa	Somalia	Gedo	Doolow		Bula Hawa	3.9276	41.8742	1	Local Source	Local	A RCIED targeted a vehicle belonging to anti-AS militias based in Bulo-Xawo. Some sources indicate that several soldiers may have been killed or wounded but local officials denied having suffered any casualties. Shooting was heard after the explosion and arrests were made by anti-AS forces.	0	1561469335	SOM
5322282	706	SOM7120	7120	2011-04-01	2011	1	Battles	Armed clash	Al Shabaab		2	12	Eastern Africa	Somalia	Banadir	Banadir		Hodan	2.0333	45.35	1	Local Source	Local	TFG/AMISOM soldiers and AS fighters clashed at Siigaale neighborhood after AS launched an attack against TFG/AMISOM positions. The AS were forced to retreat after 40 minutes of fighting. Casualties from both sides could not be established.	0	1561469335	SOM
5322284	706	SOM7122	7122	2011-04-01	2011	1	Battles	Armed clash	Al Shabaab		2	23	Eastern Africa	Somalia	Lower Juba	Afmadow		Dhobley	0.4063	41.0124	1	Local Source	Local	Anti-AS forces launched one of the heaviest shelling - using 120 mm mortars - against AS forces in Dhoobley since the beginning of the military operations in that area. The shelling was followed by a new attack of a combined force composed of Somali militias trained in Kenya and Militia (Ahmed Madoobe). The battle lasted until 14.00. Communications with Dhoobley were cut-off after telecom antenna…	0	1561469335	SOM
5322283	706	SOM7121	7121	2011-04-01	2011	1	Battles	Armed clash	Al Shabaab		2	12	Eastern Africa	Somalia	Banadir	Banadir		Hodan	2.0333	45.35	1	Local Source	Local	TFG/AMISOM soldiers clashed heavily with AS fighters at Dhagaxtur School near Dabka junction and Siigaale area near Shaqalaha building. Initial report indicates that one TFG soldier was killed and two others injured. Casualties from AS could not be established. AS fighters were repulsed after half an hour of fighting.	1	1561469335	SOM
5322285	706	SOM7123	7123	2011-04-01	2011	1	Explosions/Remote violence	Grenade	Unidentified Armed Group (Somalia)		3	37	Eastern Africa	Somalia	Lower Shabelle	Afgooye		Madiina	2.2204	45.2259	1	Local Source	Local	Two hang grenades were hurled at the front gate of a UN compound in Medina District. The grenades exploded outside of the compound on the main road. The assaulters managed to escape. No casualties were reported.	0	1561469335	SOM
5322285	706	SOM7123	7123	2011-04-01	2011	1	Explosions/Remote violence	Grenade	Civilians (International)		7	37	Eastern Africa	Somalia	Lower Shabelle	Afgooye		Madiina	2.2204	45.2259	1	Local Source	Local	Two hang grenades were hurled at the front gate of a UN compound in Medina District. The grenades exploded outside of the compound on the main road. The assaulters managed to escape. No casualties were reported.	0	1561469335	SOM
5322282	706	SOM7120	7120	2011-04-01	2011	1	Battles	Armed clash	Military Forces of Somalia (2004-2012)	AMISOM: African Union Mission in Somalia (2007-)	1	12	Eastern Africa	Somalia	Banadir	Banadir		Hodan	2.0333	45.35	1	Local Source	Local	TFG/AMISOM soldiers and AS fighters clashed at Siigaale neighborhood after AS launched an attack against TFG/AMISOM positions. The AS were forced to retreat after 40 minutes of fighting. Casualties from both sides could not be established.	0	1561469335	SOM
5322284	706	SOM7122	7122	2011-04-01	2011	1	Battles	Armed clash	Militia (Anti-Al Shabaab)		3	23	Eastern Africa	Somalia	Lower Juba	Afmadow		Dhobley	0.4063	41.0124	1	Local Source	Local	Anti-AS forces launched one of the heaviest shelling - using 120 mm mortars - against AS forces in Dhoobley since the beginning of the military operations in that area. The shelling was followed by a new attack of a combined force composed of Somali militias trained in Kenya and Militia (Ahmed Madoobe). The battle lasted until 14.00. Communications with Dhoobley were cut-off after telecom antenna…	0	1561469335	SOM
5322283	706	SOM7121	7121	2011-04-01	2011	1	Battles	Armed clash	Military Forces of Somalia (2004-2012)	AMISOM: African Union Mission in Somalia (2007-)	1	12	Eastern Africa	Somalia	Banadir	Banadir		Hodan	2.0333	45.35	1	Local Source	Local	TFG/AMISOM soldiers clashed heavily with AS fighters at Dhagaxtur School near Dabka junction and Siigaale area near Shaqalaha building. Initial report indicates that one TFG soldier was killed and two others injured. Casualties from AS could not be established. AS fighters were repulsed after half an hour of fighting.	1	1561469335	SOM
5322288	706	SOM7126	7126	2011-04-02	2011	1	Battles	Armed clash	Al Shabaab		2	12	Eastern Africa	Somalia	Banadir	Banadir		Hawl Wadaag	2.048	45.32	1	Local Source	Local	AS militants launched an attack early in the morning against AMISOM/TFG positions in the above mentioned areas. The fighting involved exchange of artillery fire. 5 civilians were reported injured.	0	1561469335	SOM
5322290	706	SOM7128	7128	2011-04-02	2011	1	Battles	Armed clash	Al Shabaab		2	12	Eastern Africa	Somalia	Banadir	Banadir		Hodan	2.0333	45.35	1	Local Source	Local	AS militants launched an attack early in the morning against AMISOM/TFG positions in the above mentioned areas. The fighting involved exchange of artillery fire. 5 civilians were reported injured.	0	1561469335	SOM
5322287	706	SOM7125	7125	2011-04-02	2011	1	Battles	Armed clash	Al Shabaab		2	12	Eastern Africa	Somalia	Banadir	Banadir		Bondhere	2.0456	45.34	1	Local Source	Local	AS militants launched an attack early in the morning against AMISOM/TFG positions in the above mentioned areas. The fighting involved exchange of artillery fire. 5 civilians were reported injured.	0	1561469335	SOM
5322289	706	SOM7127	7127	2011-04-02	2011	1	Battles	Armed clash	Al Shabaab		2	12	Eastern Africa	Somalia	Banadir	Banadir		Hodan	2.0333	45.35	1	Local Source	Local	AS forces launched an attack against TFG/AMISOM positions in the Milk Factory area, resulting in heavy clashes. Unconfirmed reports indicate that a stray mortar round landed in Black Sea neighborhood in Hodan district, killing one person and injuring six others. AS fighters were repulsed after an hour of fighting. Casualties from both sides could not be established.	0	1561469335	SOM
5322294	706	SOM7132	7132	2011-04-02	2011	1	Violence against civilians	Attack	Military Forces of Somaliland (2010-)		1	17	Eastern Africa	Somalia	Sool	Laas Caanood		Laascaanood	8.4774	47.3597	1	Local Source	Local	15-year old student was reportedly shot by Somaliland security forces while moving in Laas Caanood during curfew hours (starts at 18.00).	0	1561469335	SOM
5322294	706	SOM7132	7132	2011-04-02	2011	1	Violence against civilians	Attack	Civilians (Somalia)		7	17	Eastern Africa	Somalia	Sool	Laas Caanood		Laascaanood	8.4774	47.3597	1	Local Source	Local	15-year old student was reportedly shot by Somaliland security forces while moving in Laas Caanood during curfew hours (starts at 18.00).	0	1561469335	SOM
5322295	706	SOM7133	7133	2011-04-02	2011	1	Violence against civilians	Attack	Unidentified Armed Group (Somalia)		3	37	Eastern Africa	Somalia	Bari	Bossaso		Bosaso	11.2842	49.1816	1	Local Source	Local	One man was shot dead and two to three others injured after unknown gunmen entered the Yasmin (or Nasiaye) Hotel - in the north-east of Galkacyo close to the main road leading to Garowe - and opened fire. The man was from the Galgala community. The reasons for his killing are not ascertained.	1	1561469335	SOM
5322295	706	SOM7133	7133	2011-04-02	2011	1	Violence against civilians	Attack	Civilians (Somalia)		7	37	Eastern Africa	Somalia	Bari	Bossaso		Bosaso	11.2842	49.1816	1	Local Source	Local	One man was shot dead and two to three others injured after unknown gunmen entered the Yasmin (or Nasiaye) Hotel - in the north-east of Galkacyo close to the main road leading to Garowe - and opened fire. The man was from the Galgala community. The reasons for his killing are not ascertained.	1	1561469335	SOM
5322286	706	SOM7124	7124	2011-04-02	2011	1	Strategic developments	Change to group/activity	Militia (Anti-Al Shabaab)		3	30	Eastern Africa	Somalia	Gedo	Ceel Waaq		El Wak	2.7352	41.0177	1	Local Source	Local	Movement of forces: Reports indicate that parts of the anti-AS militias fighting in Dhoobley have withdrawn from the area, possibly to move towards Ceel-Waaq. It is said that the militias are composed of non-Ogadenis who are complaining of being used unfairly and put at risk by their top command.	0	1561469335	SOM
5322288	706	SOM7126	7126	2011-04-02	2011	1	Battles	Armed clash	Military Forces of Somalia (2004-2012)		1	12	Eastern Africa	Somalia	Banadir	Banadir		Hawl Wadaag	2.048	45.32	1	Local Source	Local	AS militants launched an attack early in the morning against AMISOM/TFG positions in the above mentioned areas. The fighting involved exchange of artillery fire. 5 civilians were reported injured.	0	1561469335	SOM
5322290	706	SOM7128	7128	2011-04-02	2011	1	Battles	Armed clash	Military Forces of Somalia (2004-2012)		1	12	Eastern Africa	Somalia	Banadir	Banadir		Hodan	2.0333	45.35	1	Local Source	Local	AS militants launched an attack early in the morning against AMISOM/TFG positions in the above mentioned areas. The fighting involved exchange of artillery fire. 5 civilians were reported injured.	0	1561469335	SOM
5322287	706	SOM7125	7125	2011-04-02	2011	1	Battles	Armed clash	Military Forces of Somalia (2004-2012)		1	12	Eastern Africa	Somalia	Banadir	Banadir		Bondhere	2.0456	45.34	1	Local Source	Local	AS militants launched an attack early in the morning against AMISOM/TFG positions in the above mentioned areas. The fighting involved exchange of artillery fire. 5 civilians were reported injured.	0	1561469335	SOM
5322292	706	SOM7130	7130	2011-04-02	2011	1	Battles	Armed clash	Hager Sub-Clan Militia (Somalia)		4	44	Eastern Africa	Somalia	Togdheer	Buuhoodle		Buuhoodle	8.2516	46.3157	1	Local Source	Local	An exchange of fire took place in Egag (approx. 50km north of Buuhoodle) between Hayga and Hager sub-clans of Dhulbahante. The clash occurred after the Hager tried to control the road that links Caynabo and Buuhoodle, traditionally under the control of the Hayga. No casualties were reported. The road is of strategic importance for commercial transport and water-trucking. Local sources indicate th…	0	1561469335	SOM
5322292	706	SOM7130	7130	2011-04-02	2011	1	Battles	Armed clash	Hayaaq Clan Militia (Somalia)		4	44	Eastern Africa	Somalia	Togdheer	Buuhoodle		Buuhoodle	8.2516	46.3157	1	Local Source	Local	An exchange of fire took place in Egag (approx. 50km north of Buuhoodle) between Hayga and Hager sub-clans of Dhulbahante. The clash occurred after the Hager tried to control the road that links Caynabo and Buuhoodle, traditionally under the control of the Hayga. No casualties were reported. The road is of strategic importance for commercial transport and water-trucking. Local sources indicate th…	0	1561469335	SOM
5322289	706	SOM7127	7127	2011-04-02	2011	1	Battles	Armed clash	Military Forces of Somalia (2004-2012)	AMISOM: African Union Mission in Somalia (2007-)	1	12	Eastern Africa	Somalia	Banadir	Banadir		Hodan	2.0333	45.35	1	Local Source	Local	AS forces launched an attack against TFG/AMISOM positions in the Milk Factory area, resulting in heavy clashes. Unconfirmed reports indicate that a stray mortar round landed in Black Sea neighborhood in Hodan district, killing one person and injuring six others. AS fighters were repulsed after an hour of fighting. Casualties from both sides could not be established.	0	1561469335	SOM
5322293	706	SOM7131	7131	2011-04-02	2011	1	Battles	Armed clash	Military Forces of Somalia (2004-2012) Puntland Security Force		1	14	Eastern Africa	Somalia	Mudug	Gaalkacyo		Gaalkacyo	6.7697	47.4308	1	Local Source	Local	Puntland security forces conducted a security operation against an illegal check-point in Bayra area, killing one man and arresting 5 to 7 others. Reports indicate that the militias that were manning this check-point were from the Saad clan.	1	1561469335	SOM
5322293	706	SOM7131	7131	2011-04-02	2011	1	Battles	Armed clash	Saad Clan Militia (Somalia)		4	14	Eastern Africa	Somalia	Mudug	Gaalkacyo		Gaalkacyo	6.7697	47.4308	1	Local Source	Local	Puntland security forces conducted a security operation against an illegal check-point in Bayra area, killing one man and arresting 5 to 7 others. Reports indicate that the militias that were manning this check-point were from the Saad clan.	1	1561469335	SOM
5322291	706	SOM7129	7129	2011-04-02	2011	1	Battles	Armed clash	Military Forces of Somalia (2004-2012) Puntland Security Force		1	13	Eastern Africa	Somalia	Mudug	Gaalkacyo		Gaalkacyo	6.7697	47.4308	1	Local Source	Local	A group of armed militiamen driving a vehicle attacked the Puntland customs check-point in Bulo-Kontrol at the green-line in Galkacyo. Some reports indicate that relatives of militiamen arrested earlier in the day at an illegal checkpoint in Bayra area went to agitate for the release of these militiamen. Puntland police reinforced control on access points to the town from South and clashed with t…	0	1561469335	SOM
5322291	706	SOM7129	7129	2011-04-02	2011	1	Battles	Armed clash	Unidentified Armed Group (Somalia)		3	13	Eastern Africa	Somalia	Mudug	Gaalkacyo		Gaalkacyo	6.7697	47.4308	1	Local Source	Local	A group of armed militiamen driving a vehicle attacked the Puntland customs check-point in Bulo-Kontrol at the green-line in Galkacyo. Some reports indicate that relatives of militiamen arrested earlier in the day at an illegal checkpoint in Bayra area went to agitate for the release of these militiamen. Puntland police reinforced control on access points to the town from South and clashed with t…	0	1561469335	SOM
5322298	706	SOM7136	7136	2011-04-03	2011	1	Battles	Armed clash	Al Shabaab		2	12	Eastern Africa	Somalia	Banadir	Banadir		Hodan	2.0333	45.35	1	Local Source	Local	TFG/AMISOM soldiers and AS fighters clashed at Shaqalaha area after AS fighters launched an attack against TFG/AMISOM positions. Two AS fighters and another person were reportedly killed and three others injured. The AS were forced to retreat.	1	1561469335	SOM
5322299	706	SOM7137	7137	2011-04-03	2011	1	Battles	Armed clash	Al Shabaab		2	23	Eastern Africa	Somalia	Lower Juba	Afmadow		Dhobley	0.4063	41.0124	1	Local Source	Local	Anti-AS forces launched a new offensive on Dhoobley town and managed to capture the town from AS by noon on 03/04. Estimation of casualties on the two sides is uncertain but at least 14 soldiers of the anti-AS militias were taken to Liboi for treatment. Top AS leaders and many wounded combatants were seen passing Tabta village moving towards Qooqaani. Unconfirmed reports indicate that Gacmo Dhere…	7	1561469335	SOM
5322297	706	SOM7135	7135	2011-04-03	2011	1	Battles	Armed clash	Al Shabaab		2	12	Eastern Africa	Somalia	Banadir	Banadir		Hawl Wadaag	2.048	45.32	1	Local Source	Local	TFG/AMISOM soldiers and AS fighters clashed at Shaqalaha, Dabka areas in Hodan district and Bermuda neighborhood near Sayidka in Howl-Wadag district. AS carried out the attack and fired several B10 and RPG rounds against TFG/AMISOM positions. AS fighters were repulsed after two hours of fighting. Initial reports indicate that two TFG soldiers were allegedly killed and 2 others injured. Casualties…	1	1561469335	SOM
5322301	706	SOM7139	7139	2011-04-03	2011	1	Explosions/Remote violence	Remote explosive/landmine/IED	Unidentified Armed Group (Somalia)		3	37	Eastern Africa	Somalia	Gedo	Luuq		Luuq	3.8	42.5446	1	Local Source	Local	A land mine explosion hit a Toyota pick-up truck delivering farming equipments to farmers in between Geer Boolow and Abdi Kheyr villages on a feeder road alongside the Juba River. The driver and his helper reportedly sustained minor injuries.	0	1561469335	SOM
5322301	706	SOM7139	7139	2011-04-03	2011	1	Explosions/Remote violence	Remote explosive/landmine/IED	Civilians (Somalia)		7	37	Eastern Africa	Somalia	Gedo	Luuq		Luuq	3.8	42.5446	1	Local Source	Local	A land mine explosion hit a Toyota pick-up truck delivering farming equipments to farmers in between Geer Boolow and Abdi Kheyr villages on a feeder road alongside the Juba River. The driver and his helper reportedly sustained minor injuries.	0	1561469335	SOM
5322302	706	SOM7140	7140	2011-04-03	2011	1	Explosions/Remote violence	Remote explosive/landmine/IED	Unidentified Armed Group (Somalia)		3	37	Eastern Africa	Somalia	Gedo	Luuq		Luuq	3.8	42.5446	1	Local Source	Local	One person died and three sustained minor injuries when the truck they were travelling in was hit by a land mine explosion near Shatilow village, 20km west of Luuq, on their way towards Doolow. The truck was loaded with a cargo of onions from Luuq.	0	1561469335	SOM
5322302	706	SOM7140	7140	2011-04-03	2011	1	Explosions/Remote violence	Remote explosive/landmine/IED	Civilians (Somalia)		7	37	Eastern Africa	Somalia	Gedo	Luuq		Luuq	3.8	42.5446	1	Local Source	Local	One person died and three sustained minor injuries when the truck they were travelling in was hit by a land mine explosion near Shatilow village, 20km west of Luuq, on their way towards Doolow. The truck was loaded with a cargo of onions from Luuq.	0	1561469335	SOM
5322300	706	SOM7138	7138	2011-04-03	2011	1	Explosions/Remote violence	Remote explosive/landmine/IED	Unidentified Armed Group (Somalia)		3	37	Eastern Africa	Somalia	Gedo	Ceel Waaq		El Wak	2.7352	41.0177	1	Local Source	Local	A land mine explosion hit a water truck delivering water to drought-hit areas near Garsaal village 40km north/east from Ceel Waaq. The driver reportedly sustained severe injuries, and his colleagues were slightly injured.	0	1561469335	SOM
5322300	706	SOM7138	7138	2011-04-03	2011	1	Explosions/Remote violence	Remote explosive/landmine/IED	Civilians (Somalia)		7	37	Eastern Africa	Somalia	Gedo	Ceel Waaq		El Wak	2.7352	41.0177	1	Local Source	Local	A land mine explosion hit a water truck delivering water to drought-hit areas near Garsaal village 40km north/east from Ceel Waaq. The driver reportedly sustained severe injuries, and his colleagues were slightly injured.	0	1561469335	SOM
5322303	706	SOM7141	7141	2011-04-03	2011	1	Explosions/Remote violence	Grenade	Unidentified Armed Group (Somalia)		3	37	Eastern Africa	Somalia	Mudug	Gaalkacyo		Gaalkacyo	6.7697	47.4308	1	Local Source	Local	Two unidentified perpetrators attacked a community policing group with a hand grenade in Garsoor village near Warshada Galayda. Two community police members were injured in the attack. The perpetrators were seen escaping in the direction of South Galkacyo. There is no verified information on whether they belong to South Galkacyo clans or whether they just use the area to hide. Unconfirmed informa…	0	1561469335	SOM
5322303	706	SOM7141	7141	2011-04-03	2011	1	Explosions/Remote violence	Grenade	Civilians (Somalia)		7	37	Eastern Africa	Somalia	Mudug	Gaalkacyo		Gaalkacyo	6.7697	47.4308	1	Local Source	Local	Two unidentified perpetrators attacked a community policing group with a hand grenade in Garsoor village near Warshada Galayda. Two community police members were injured in the attack. The perpetrators were seen escaping in the direction of South Galkacyo. There is no verified information on whether they belong to South Galkacyo clans or whether they just use the area to hide. Unconfirmed informa…	0	1561469335	SOM
5322296	706	SOM7134	7134	2011-04-03	2011	1	Protests	Peaceful protest	Protesters (Somalia)		6	60	Eastern Africa	Somalia	Lower Shabelle	Afgooye		Madiina	2.2204	45.2259	1	Local Source	Local	IDPs from the ex-US Embassy Settlement demonstrated in front of a UN compound in Medina District to protest against perceived inequalities in the distribution of humanitarian assistance. The demonstration remained peaceful and moved towards K4 mixing the original slogans with messages in support of the liberation of the Shabelle journalists that had been arrested by the TFG.	0	1561469335	SOM
5322298	706	SOM7136	7136	2011-04-03	2011	1	Battles	Armed clash	Military Forces of Somalia (2004-2012)	AMISOM: African Union Mission in Somalia (2007-)	1	12	Eastern Africa	Somalia	Banadir	Banadir		Hodan	2.0333	45.35	1	Local Source	Local	TFG/AMISOM soldiers and AS fighters clashed at Shaqalaha area after AS fighters launched an attack against TFG/AMISOM positions. Two AS fighters and another person were reportedly killed and three others injured. The AS were forced to retreat.	1	1561469335	SOM
5322299	706	SOM7137	7137	2011-04-03	2011	1	Battles	Armed clash	Militia (Anti-Al Shabaab)		3	23	Eastern Africa	Somalia	Lower Juba	Afmadow		Dhobley	0.4063	41.0124	1	Local Source	Local	Anti-AS forces launched a new offensive on Dhoobley town and managed to capture the town from AS by noon on 03/04. Estimation of casualties on the two sides is uncertain but at least 14 soldiers of the anti-AS militias were taken to Liboi for treatment. Top AS leaders and many wounded combatants were seen passing Tabta village moving towards Qooqaani. Unconfirmed reports indicate that Gacmo Dhere…	7	1561469335	SOM
5322297	706	SOM7135	7135	2011-04-03	2011	1	Battles	Armed clash	Military Forces of Somalia (2004-2012)	AMISOM: African Union Mission in Somalia (2007-)	1	12	Eastern Africa	Somalia	Banadir	Banadir		Hawl Wadaag	2.048	45.32	1	Local Source	Local	TFG/AMISOM soldiers and AS fighters clashed at Shaqalaha, Dabka areas in Hodan district and Bermuda neighborhood near Sayidka in Howl-Wadag district. AS carried out the attack and fired several B10 and RPG rounds against TFG/AMISOM positions. AS fighters were repulsed after two hours of fighting. Initial reports indicate that two TFG soldiers were allegedly killed and 2 others injured. Casualties…	1	1561469335	SOM
5322307	706	SOM7145	7145	2011-04-04	2011	1	Explosions/Remote violence	Shelling/artillery/missile attack	Al Shabaab		2	28	Eastern Africa	Somalia	Banadir	Banadir		Hodan	2.0333	45.35	1	Local Source	Local	Several artillery rounds reportedly landed close to the Black Sea road and to the Nasruddin Mosque as a result of an AMISOM artillery shelling against AS positions in Black Sea neighborhood. A round is reported to have landed on a fuel depot igniting a fire that destroyed business buildings and other properties. There was no confirmation of any casualties.	0	1561469335	SOM
5322306	706	SOM7144	7144	2011-04-04	2011	1	Battles	Armed clash	Al Shabaab		2	23	Eastern Africa	Somalia	Lower Juba	Afmadow		Dhobley	0.4063	41.0124	1	Local Source	Local	Anti-AS Forces are reported to have captured 2 AS technicals during clashes between Afmadow and Qooqaani that occurred during a pursuit of AS forces leaving Dhoobley. The battle wagons were taken to Liboi (Kenya) on Monday afternoon.	0	1561469335	SOM
5322308	706	SOM7146	7146	2011-04-04	2011	1	Strategic developments	Looting/property destruction	Mudug Authority Militia		3	37	Eastern Africa	Somalia	Mudug	Gaalkacyo		Gaalkacyo	6.7692	47.4306	1	Local Source	Local	Militias coming from the south of Mudug Region reportedly attempted to rob a commercial truck travelling in Bayra area. The truck managed to escape and none of its passengers suffered any harm.	0	1561469335	SOM
5322308	706	SOM7146	7146	2011-04-04	2011	1	Strategic developments	Looting/property destruction	Civilians (Somalia)		7	37	Eastern Africa	Somalia	Mudug	Gaalkacyo		Gaalkacyo	6.7692	47.4306	1	Local Source	Local	Militias coming from the south of Mudug Region reportedly attempted to rob a commercial truck travelling in Bayra area. The truck managed to escape and none of its passengers suffered any harm.	0	1561469335	SOM
5322309	706	SOM7147	7147	2011-04-04	2011	1	Explosions/Remote violence	Grenade	Unidentified Armed Group (Somalia)		3	37	Eastern Africa	Somalia	Banadir	Banadir		Wadajir	2.0462	45.3341	1	Local Source	Local	A hand grenade was hurled at a UN compound and exploded inside the compound along to the perimeter wall close to a watch tower. Two guards were reported to have sustained minor injuries. The attack is believed to have been conducted from a close distance to the compound.	0	1561469335	SOM
5322309	706	SOM7147	7147	2011-04-04	2011	1	Explosions/Remote violence	Grenade	Civilians (Somalia)		7	37	Eastern Africa	Somalia	Banadir	Banadir		Wadajir	2.0462	45.3341	1	Local Source	Local	A hand grenade was hurled at a UN compound and exploded inside the compound along to the perimeter wall close to a watch tower. Two guards were reported to have sustained minor injuries. The attack is believed to have been conducted from a close distance to the compound.	0	1561469335	SOM
5322307	706	SOM7145	7145	2011-04-04	2011	1	Explosions/Remote violence	Shelling/artillery/missile attack	AMISOM: African Union Mission in Somalia (2007-)		8	28	Eastern Africa	Somalia	Banadir	Banadir		Hodan	2.0333	45.35	1	Local Source	Local	Several artillery rounds reportedly landed close to the Black Sea road and to the Nasruddin Mosque as a result of an AMISOM artillery shelling against AS positions in Black Sea neighborhood. A round is reported to have landed on a fuel depot igniting a fire that destroyed business buildings and other properties. There was no confirmation of any casualties.	0	1561469335	SOM
5322304	706	SOM7142	7142	2011-04-04	2011	1	Protests	Peaceful protest	Protesters (Somalia)		6	60	Eastern Africa	Somalia	Lower Shabelle	Afgooye		Madiina	2.2204	45.2259	1	Local Source	Local	IDPs from the ex-US Embassy Settlement demonstrated in front of a UN compound in Medina District to protest against perceived inequalities in the distribution of humanitarian assistance. The demonstration remained peaceful and moved towards K4 mixing the original slogans with messages in support of the liberation of the Shabelle journalists that had been arrested by the TFG.	0	1561469335	SOM
5322306	706	SOM7144	7144	2011-04-04	2011	1	Battles	Armed clash	Militia (Anti-Al Shabaab)		3	23	Eastern Africa	Somalia	Lower Juba	Afmadow		Dhobley	0.4063	41.0124	1	Local Source	Local	Anti-AS Forces are reported to have captured 2 AS technicals during clashes between Afmadow and Qooqaani that occurred during a pursuit of AS forces leaving Dhoobley. The battle wagons were taken to Liboi (Kenya) on Monday afternoon.	0	1561469335	SOM
5322305	706	SOM7143	7143	2011-04-04	2011	1	Battles	Armed clash	Military Forces of Somalia (2004-2012)		1	11	Eastern Africa	Somalia	Banadir	Banadir		Dharkenley	2.0095	45.25	1	Local Source	Local	TFG soldiers clashed among themselves after a dispute over tax/money they had been taken from the owner of a house under construction. 5 persons including 1 TFG soldiers were reportedly killed and 3 others injured.	5	1561469335	SOM
5322305	706	SOM7143	7143	2011-04-04	2011	1	Battles	Armed clash	Military Forces of Somalia (2004-2012)		1	11	Eastern Africa	Somalia	Banadir	Banadir		Dharkenley	2.0095	45.25	1	Local Source	Local	TFG soldiers clashed among themselves after a dispute over tax/money they had been taken from the owner of a house under construction. 5 persons including 1 TFG soldiers were reportedly killed and 3 others injured.	5	1561469335	SOM
5322311	706	SOM7149	7149	2011-04-05	2011	1	Strategic developments	Non-violent transfer of territory	Al Shabaab		2	20	Eastern Africa	Somalia	Lower Juba	Afmadow		Tabta	0.3046	41.4394	1	Local Source	Local	AS are reported to be regrouping in Tabta (40km from Dhoobley)	0	1561469335	SOM
5322310	706	SOM7148	7148	2011-04-05	2011	1	Strategic developments	Non-violent transfer of territory	Al Shabaab		2	20	Eastern Africa	Somalia	Lower Juba	Afmadow		Bilis Qooqaani	0.2837	41.7141	2	Local Source	Local	AS are reported to be regrouping in Qooqaani (120 km from Dhoobley) and rumors are that they intend to launch a counter-attack on Dhoobley.	0	1561469335	SOM
5322313	706	SOM7151	7151	2011-04-05	2011	1	Battles	Armed clash	Al Shabaab		2	12	Eastern Africa	Somalia	Banadir	Banadir		Bondhere	2.0456	45.34	1	Local Source	Local	AS militants launched an attack against the TFG base at the above mentioned area early in the morning. The confrontation lasted for around 15 minutes. No civilian casualties were reported.	0	1561469335	SOM
5322312	706	SOM7150	7150	2011-04-05	2011	1	Battles	Armed clash	Al Shabaab		2	12	Eastern Africa	Somalia	Banadir	Banadir		Hawl Wadaag	2.048	45.32	1	Local Source	Local	AS forces launched an attack against AMISOM/TFG positions near Sayidka Junction. AS were repulsed. Casualties from both sides could not be established.	0	1561469335	SOM
5322316	706	SOM7154	7154	2011-04-05	2011	1	Explosions/Remote violence	Grenade	Unidentified Armed Group (Somalia)		3	37	Eastern Africa	Somalia	Woqooyi Galbeed	Hargeysa		Hargeysa	9.5598	44.0668	1	Local Source	Local	A man hurled an explosive device, probably a hand grenade, in a crowd in the center of Hargeisa town near Geele Arab office. According to Somaliland authorities 19 persons were reportedly injured including the man who threw the device. At the time of the writing of this report the explanation of the incident was that the perpetrator was mentally ill and that the grenade was an UXO he had found el…	0	1561469335	SOM
5322316	706	SOM7154	7154	2011-04-05	2011	1	Explosions/Remote violence	Grenade	Civilians (Somalia)		7	37	Eastern Africa	Somalia	Woqooyi Galbeed	Hargeysa		Hargeysa	9.5598	44.0668	1	Local Source	Local	A man hurled an explosive device, probably a hand grenade, in a crowd in the center of Hargeisa town near Geele Arab office. According to Somaliland authorities 19 persons were reportedly injured including the man who threw the device. At the time of the writing of this report the explanation of the incident was that the perpetrator was mentally ill and that the grenade was an UXO he had found el…	0	1561469335	SOM
5322315	706	SOM7153	7153	2011-04-05	2011	1	Battles	Armed clash	Saad Clan Militia (Somalia)		4	44	Eastern Africa	Somalia	Galgaduud	Cadaado		Cadaado	6.1457	46.6271	1	Local Source	Local	Clan clashes between Saleban and Saad clans took place in and around Duduma-Adde and Wanakir villages, 50km east of Cadaado. The dispute was caused by competition over grazing areas. 2 to 5 people were killed and 5 to 13 wounded. Further clashes could occur in the coming days.	4	1561469335	SOM
5322315	706	SOM7153	7153	2011-04-05	2011	1	Battles	Armed clash	Saleban Clan Militia (Somalia)		4	44	Eastern Africa	Somalia	Galgaduud	Cadaado		Cadaado	6.1457	46.6271	1	Local Source	Local	Clan clashes between Saleban and Saad clans took place in and around Duduma-Adde and Wanakir villages, 50km east of Cadaado. The dispute was caused by competition over grazing areas. 2 to 5 people were killed and 5 to 13 wounded. Further clashes could occur in the coming days.	4	1561469335	SOM
5322313	706	SOM7151	7151	2011-04-05	2011	1	Battles	Armed clash	Military Forces of Somalia (2004-2012)		1	12	Eastern Africa	Somalia	Banadir	Banadir		Bondhere	2.0456	45.34	1	Local Source	Local	AS militants launched an attack against the TFG base at the above mentioned area early in the morning. The confrontation lasted for around 15 minutes. No civilian casualties were reported.	0	1561469335	SOM
5322312	706	SOM7150	7150	2011-04-05	2011	1	Battles	Armed clash	Military Forces of Somalia (2004-2012)	AMISOM: African Union Mission in Somalia (2007-)	1	12	Eastern Africa	Somalia	Banadir	Banadir		Hawl Wadaag	2.048	45.32	1	Local Source	Local	AS forces launched an attack against AMISOM/TFG positions near Sayidka Junction. AS were repulsed. Casualties from both sides could not be established.	0	1561469335	SOM
5322314	706	SOM7152	7152	2011-04-05	2011	1	Battles	Armed clash	Garaad-Gullied Sub-Clan Militia (Somalia)		4	44	Eastern Africa	Somalia	Togdheer	Buuhoodle		Buuhoodle	8.2516	46.3157	1	Local Source	Local	Fighting broke out in Buuhoodle town as a result of disagreements among the Garaad Gullied clan of Dulbahante over plans to conduct a revenge attack against Mr. Kayse Ahmed Abdi. One person was killed in the incident. Mr. Kayse Ahmed, a SSC leader, had recently defected to Somaliland and returned to Widh-Widh with Somaliland officials for meetings and negotiations with the local community on 04/0…	0	1561469335	SOM
5322314	706	SOM7152	7152	2011-04-05	2011	1	Battles	Armed clash	Garaad-Gullied Sub-Clan Militia (Somalia)		4	44	Eastern Africa	Somalia	Togdheer	Buuhoodle		Buuhoodle	8.2516	46.3157	1	Local Source	Local	Fighting broke out in Buuhoodle town as a result of disagreements among the Garaad Gullied clan of Dulbahante over plans to conduct a revenge attack against Mr. Kayse Ahmed Abdi. One person was killed in the incident. Mr. Kayse Ahmed, a SSC leader, had recently defected to Somaliland and returned to Widh-Widh with Somaliland officials for meetings and negotiations with the local community on 04/0…	0	1561469335	SOM
5322326	706	SOM7164	7164	2011-04-06	2011	1	Explosions/Remote violence	Air/drone strike	Al Shabaab		2	28	Eastern Africa	Somalia	Lower Juba	Afmadow		Dhobley	0.4063	41.0124	1	Washington Post	Subnational	A U.S. airstrike killed a senior al Shabaab leader named as Hassan Abdurrahman Gumarey. No other fatalities reported.	1	1561469335	SOM
5322319	706	SOM7157	7157	2011-04-06	2011	1	Battles	Armed clash	Al Shabaab		2	12	Eastern Africa	Somalia	Banadir	Banadir		Dharkenley	2.0095	45.25	1	Local Source	Local	AS militants launched an attack against TFG forces based in the former Custodian Corps headquarter) very close to Ex-control Afgooye. The clash lasted for around 10 minutes. 2 civilians were reportedly injured.	0	1561469335	SOM
5322326	706	SOM7164	7164	2011-04-06	2011	1	Explosions/Remote violence	Air/drone strike	Military Forces of United States		8	28	Eastern Africa	Somalia	Lower Juba	Afmadow		Dhobley	0.4063	41.0124	1	Washington Post	Subnational	A U.S. airstrike killed a senior al Shabaab leader named as Hassan Abdurrahman Gumarey. No other fatalities reported.	1	1561469335	SOM
5322323	706	SOM7161	7161	2011-04-06	2011	1	Violence against civilians	Attack	Unidentified Armed Group (Somalia)		3	37	Eastern Africa	Somalia	Banadir	Banadir		Dharkenley	2.0095	45.25	1	Local Source	Local	Two members of clan militias affiliated to the Dharkenley district administration were reportedly killed by unidentified gunmen in Suqbocle neighbourhood. The incident is believed to be a case of a revenge killing in an on-going conflict between the local militias.	2	1561469335	SOM
5322323	706	SOM7161	7161	2011-04-06	2011	1	Violence against civilians	Attack	Civilians (Somalia)		7	37	Eastern Africa	Somalia	Banadir	Banadir		Dharkenley	2.0095	45.25	1	Local Source	Local	Two members of clan militias affiliated to the Dharkenley district administration were reportedly killed by unidentified gunmen in Suqbocle neighbourhood. The incident is believed to be a case of a revenge killing in an on-going conflict between the local militias.	2	1561469335	SOM
5322322	706	SOM7160	7160	2011-04-06	2011	1	Explosions/Remote violence	Grenade	Unidentified Armed Group (Somalia)		3	37	Eastern Africa	Somalia	Banadir	Banadir		Dharkenley	2.0095	45.25	1	Local Source	Local	A hand grenade was hurled inside the house of a junior TFG police commander in Shawriyasha neighbourhood. Two of his children were reportedly injured in the explosion. Four young men suspected of involvement were arrested following the attack. Motive behind the attack is currently unknown.	0	1561469335	SOM
5322322	706	SOM7160	7160	2011-04-06	2011	1	Explosions/Remote violence	Grenade	Civilians (Somalia)		7	37	Eastern Africa	Somalia	Banadir	Banadir		Dharkenley	2.0095	45.25	1	Local Source	Local	A hand grenade was hurled inside the house of a junior TFG police commander in Shawriyasha neighbourhood. Two of his children were reportedly injured in the explosion. Four young men suspected of involvement were arrested following the attack. Motive behind the attack is currently unknown.	0	1561469335	SOM
5322321	706	SOM7159	7159	2011-04-06	2011	1	Violence against civilians	Attack	Unidentified Armed Group (Somalia)		3	37	Eastern Africa	Somalia	Bari	Bossaso		Bosaso	11.2842	49.1816	1	Local Source	Local	A prominent traditional elder belonging to the Darood/Majerteen/Ali Saleban was assassinated after leaving Rahmo Mosque in Bossaso after a prayer. One other man was killed and another one injured by stray bullets. The reason for the killing is currently unknown. The Sheikh was reportedly in the process of replacing Sheikh Sultan Isse Omar who was also assassinated in Bossaso town on 22nd November…	0	1561469335	SOM
5322321	706	SOM7159	7159	2011-04-06	2011	1	Violence against civilians	Attack	Civilians (Somalia)		7	37	Eastern Africa	Somalia	Bari	Bossaso		Bosaso	11.2842	49.1816	1	Local Source	Local	A prominent traditional elder belonging to the Darood/Majerteen/Ali Saleban was assassinated after leaving Rahmo Mosque in Bossaso after a prayer. One other man was killed and another one injured by stray bullets. The reason for the killing is currently unknown. The Sheikh was reportedly in the process of replacing Sheikh Sultan Isse Omar who was also assassinated in Bossaso town on 22nd November…	0	1561469335	SOM
5322320	706	SOM7158	7158	2011-04-06	2011	1	Explosions/Remote violence	Grenade	Unidentified Armed Group (Somalia)		3	13	Eastern Africa	Somalia	Banadir	Banadir		Dharkenley	2.0095	45.25	1	Local Source	Local	Unidentified men hurled a hand grenade at a residence of a TFG officer. The officer was not at home when the incident took place but 3 of his family members were injured. A search operation conducted by TFG forces in response to the attack led to the arrest of 4 suspects.	0	1561469335	SOM
5322320	706	SOM7158	7158	2011-04-06	2011	1	Explosions/Remote violence	Grenade	Military Forces of Somalia (2004-2012)		1	13	Eastern Africa	Somalia	Banadir	Banadir		Dharkenley	2.0095	45.25	1	Local Source	Local	Unidentified men hurled a hand grenade at a residence of a TFG officer. The officer was not at home when the incident took place but 3 of his family members were injured. A search operation conducted by TFG forces in response to the attack led to the arrest of 4 suspects.	0	1561469335	SOM
5322318	706	SOM7156	7156	2011-04-06	2011	1	Protests	Peaceful protest	Protesters (Somalia)		6	60	Eastern Africa	Somalia	Mudug	Gaalkacyo		Gaalkacyo	6.7697	47.4308	1	Local Source	Local	About a hundred people gathered in Galkacyo in support of the Prime Ministers stance on oppositon of the UNPOS organized consultative conference in Nairobi and the right of the TFG to decide on the future of the Somali peace process without a significant UN interference.	0	1561469335	SOM
5322317	706	SOM7155	7155	2011-04-06	2011	1	Protests	Peaceful protest	Protesters (Somalia)		6	60	Eastern Africa	Somalia	Togdheer	Buuhoodle		Buuhoodle	8.2516	46.3157	1	Local Source	Local	around 40 people gathered in Buuhodle to show their support for the decision of the Somali president Sheikh Sharif not to attend the consultative conference organized by UNPOS in Nairobi (scheduled for 12th-13th April 2011). The demonstrators also protested against lack space for SSC to play a role in the peace building process in Somalia.	0	1561469335	SOM
5322319	706	SOM7157	7157	2011-04-06	2011	1	Battles	Armed clash	Military Forces of Somalia (2004-2012)		1	12	Eastern Africa	Somalia	Banadir	Banadir		Dharkenley	2.0095	45.25	1	Local Source	Local	AS militants launched an attack against TFG forces based in the former Custodian Corps headquarter) very close to Ex-control Afgooye. The clash lasted for around 10 minutes. 2 civilians were reportedly injured.	0	1561469335	SOM
5322324	706	SOM7162	7162	2011-04-06	2011	1	Violence against civilians	Attack	Unidentified Armed Group (Somalia)		3	37	Eastern Africa	Somalia	Nugaal	Garoowe		Garowe	8.4064	48.4819	1	Local Source	Local	A staff of a LNGO, 3 of his bodyguards and 1 woman travelling with him were killed after being ambushed by 2 gunmen with AK47s while driving between the Ministry of Education and the Ministry of Justice. 3 other passengers were also reportedly injured. The incident is believed to be motivated by clan revenge killing opposing Darood/Majerteen/Omar Mohamud and Darood/Majerteen/Issa Mohamud and is n…	4	1561469335	SOM
5322324	706	SOM7162	7162	2011-04-06	2011	1	Violence against civilians	Attack	Civilians (Somalia)		7	37	Eastern Africa	Somalia	Nugaal	Garoowe		Garowe	8.4064	48.4819	1	Local Source	Local	A staff of a LNGO, 3 of his bodyguards and 1 woman travelling with him were killed after being ambushed by 2 gunmen with AK47s while driving between the Ministry of Education and the Ministry of Justice. 3 other passengers were also reportedly injured. The incident is believed to be motivated by clan revenge killing opposing Darood/Majerteen/Omar Mohamud and Darood/Majerteen/Issa Mohamud and is n…	4	1561469335	SOM
5322325	706	SOM7163	7163	2011-04-06	2011	1	Violence against civilians	Sexual violence	Saad Clan Militia (Somalia)		4	47	Eastern Africa	Somalia	Mudug	Gaalkacyo		Gaalkacyo	6.7697	47.4308	1	Local Source	Local	Armed militiamen belonging to the Saad clan stopped a passenger minibus and looted valuables from the passengers. A women was also reportedly taken out of the bus and raped.	0	1561469335	SOM
5322325	706	SOM7163	7163	2011-04-06	2011	1	Violence against civilians	Sexual violence	Civilians (Somalia)	Women (Somalia)	7	47	Eastern Africa	Somalia	Mudug	Gaalkacyo		Gaalkacyo	6.7697	47.4308	1	Local Source	Local	Armed militiamen belonging to the Saad clan stopped a passenger minibus and looted valuables from the passengers. A women was also reportedly taken out of the bus and raped.	0	1561469335	SOM
5322327	706	SOM7165	7165	2011-04-07	2011	1	Protests	Peaceful protest	Protesters (Somalia)	Women (Somalia)	6	60	Eastern Africa	Somalia	Banadir	Banadir		Xamar Jaabjab	2.0276	45.33	1	Local Source	Local	Around one hundred people gathered at the Mogadishu Police Academy square to show their opposition to the upcoming consultative conference organized by UNPOS in Nairobi. The demonstration was organized by women and youth associations and Clerics (Majma Al Islamiya).	0	1561469335	SOM
5322329	706	SOM7167	7167	2011-04-08	2011	1	Battles	Armed clash	Al Shabaab		2	12	Eastern Africa	Somalia	Banadir	Banadir		Hodan	2.0333	45.35	1	Local Source	Local	TFG/AMISOM troops clashed with AS militants at Siigaale Neighbourhood of Hodan District, after the AS attacked TFG/AMISOM positions. The fighting lasted for about ten minutes. Casualties could not be established.	0	1561469335	SOM
5322328	706	SOM7166	7166	2011-04-08	2011	1	Battles	Armed clash	Al Shabaab		2	12	Eastern Africa	Somalia	Gedo	Ceel Waaq		El Wak	2.7352	41.0177	1	Local Source	Local	AS militias attacked positions of pro-TFG militia in El-wak. Clashes that were believed to be a part of the AS hit and run tactics lasted for about 30 minutes. Causalities were not established.	0	1561469335	SOM
5322329	706	SOM7167	7167	2011-04-08	2011	1	Battles	Armed clash	Military Forces of Somalia (2004-2012)	AMISOM: African Union Mission in Somalia (2007-)	1	12	Eastern Africa	Somalia	Banadir	Banadir		Hodan	2.0333	45.35	1	Local Source	Local	TFG/AMISOM troops clashed with AS militants at Siigaale Neighbourhood of Hodan District, after the AS attacked TFG/AMISOM positions. The fighting lasted for about ten minutes. Casualties could not be established.	0	1561469335	SOM
5322328	706	SOM7166	7166	2011-04-08	2011	1	Battles	Armed clash	Military Forces of Somalia (2004-2012)		1	12	Eastern Africa	Somalia	Gedo	Ceel Waaq		El Wak	2.7352	41.0177	1	Local Source	Local	AS militias attacked positions of pro-TFG militia in El-wak. Clashes that were believed to be a part of the AS hit and run tactics lasted for about 30 minutes. Causalities were not established.	0	1561469335	SOM
5322336	706	SOM7174	7174	2011-04-09	2011	1	Battles	Armed clash	Al Shabaab		2	23	Eastern Africa	Somalia	Gedo	Luuq		Luuq	3.8	42.5446	1	Local Source	Local	Fighting between ASWJ/pro-TFG troops and AS has taken place in Luuq. ASWJ/Pro-TFG forces remain in control of Luuq although it is believed to have temporarily lost control over some of its positions	0	1561469335	SOM
5322332	706	SOM7170	7170	2011-04-09	2011	1	Battles	Armed clash	Al Shabaab		2	12	Eastern Africa	Somalia	Banadir	Banadir		Hodan	2.0333	45.35	1	Local Source	Local	AS launched an attack on TFG/AMISOM positions at the above mentioned areas. The fighting started in Boondheere in the evening of 9th April and continued until the morning of 10th April. 3 civilians were reported dead and 6 others injured.	1	1561469335	SOM
5322331	706	SOM7169	7169	2011-04-09	2011	1	Battles	Armed clash	Al Shabaab		2	12	Eastern Africa	Somalia	Banadir	Banadir		Hawl Wadaag	2.048	45.32	1	Local Source	Local	AS launched an attack on TFG/AMISOM positions at the above mentioned areas. The fighting started in Boondheere in the evening of 9th April and continued until the morning of 10th April. 3 civilians were reported dead and 6 others injured.	1	1561469335	SOM
5322330	706	SOM7168	7168	2011-04-09	2011	1	Battles	Armed clash	Al Shabaab		2	12	Eastern Africa	Somalia	Banadir	Banadir		Bondhere	2.0456	45.34	1	Local Source	Local	AS launched an attack on TFG/AMISOM positions at the above mentioned areas. The fighting started in Boondheere in the evening of 9th April and continued until the morning of 9th April. 3 civilians were reported dead and 6 others injured.	1	1561469335	SOM
5322335	706	SOM7173	7173	2011-04-09	2011	1	Battles	Armed clash	Al Shabaab		2	23	Eastern Africa	Somalia	Gedo	Baardheere		Kureed	2.24	42.33	1	Local Source	Local	Fighting between ASWJ/pro-TFG troops and AS has taken place Kureedka (about 6 Km towards Bardale)	0	1561469335	SOM
5322333	706	SOM7171	7171	2011-04-09	2011	1	Explosions/Remote violence	Remote explosive/landmine/IED	Unidentified Armed Group (Somalia)		3	13	Eastern Africa	Somalia	Bakool	Ceel Barde		Ato	4.6205	43.3502	1	Local Source	Local	RCIED targeted a convoy of prominent pro-TFG elder Ugaas Haaruun (Darood/Ogaden) at Ato during his trip from Elberde district of Bakool region to Baarey - Ethiopia. Colonel Abdi Mohamed Dile was injured in the explosion. Escort of the convoy opened fire following the explosion.	0	1561469335	SOM
5322333	706	SOM7171	7171	2011-04-09	2011	1	Explosions/Remote violence	Remote explosive/landmine/IED	Military Forces of Somalia (2004-2012)		1	13	Eastern Africa	Somalia	Bakool	Ceel Barde		Ato	4.6205	43.3502	1	Local Source	Local	RCIED targeted a convoy of prominent pro-TFG elder Ugaas Haaruun (Darood/Ogaden) at Ato during his trip from Elberde district of Bakool region to Baarey - Ethiopia. Colonel Abdi Mohamed Dile was injured in the explosion. Escort of the convoy opened fire following the explosion.	0	1561469335	SOM
5322336	706	SOM7174	7174	2011-04-09	2011	1	Battles	Armed clash	ASWJ: Ahlu Sunna Wal Jamaa		3	23	Eastern Africa	Somalia	Gedo	Luuq		Luuq	3.8	42.5446	1	Local Source	Local	Fighting between ASWJ/pro-TFG troops and AS has taken place in Luuq. ASWJ/Pro-TFG forces remain in control of Luuq although it is believed to have temporarily lost control over some of its positions	0	1561469335	SOM
5322332	706	SOM7170	7170	2011-04-09	2011	1	Battles	Armed clash	Military Forces of Somalia (2004-2012)	AMISOM: African Union Mission in Somalia (2007-)	1	12	Eastern Africa	Somalia	Banadir	Banadir		Hodan	2.0333	45.35	1	Local Source	Local	AS launched an attack on TFG/AMISOM positions at the above mentioned areas. The fighting started in Boondheere in the evening of 9th April and continued until the morning of 10th April. 3 civilians were reported dead and 6 others injured.	1	1561469335	SOM
5322331	706	SOM7169	7169	2011-04-09	2011	1	Battles	Armed clash	Military Forces of Somalia (2004-2012)	AMISOM: African Union Mission in Somalia (2007-)	1	12	Eastern Africa	Somalia	Banadir	Banadir		Hawl Wadaag	2.048	45.32	1	Local Source	Local	AS launched an attack on TFG/AMISOM positions at the above mentioned areas. The fighting started in Boondheere in the evening of 9th April and continued until the morning of 10th April. 3 civilians were reported dead and 6 others injured.	1	1561469335	SOM
5322330	706	SOM7168	7168	2011-04-09	2011	1	Battles	Armed clash	Military Forces of Somalia (2004-2012)	AMISOM: African Union Mission in Somalia (2007-)	1	12	Eastern Africa	Somalia	Banadir	Banadir		Bondhere	2.0456	45.34	1	Local Source	Local	AS launched an attack on TFG/AMISOM positions at the above mentioned areas. The fighting started in Boondheere in the evening of 9th April and continued until the morning of 9th April. 3 civilians were reported dead and 6 others injured.	1	1561469335	SOM
5322337	706	SOM7175	7175	2011-04-09	2011	1	Battles	Armed clash	Militia (Kayse Abdi Yusuf)		3	33	Eastern Africa	Somalia	Togdheer	Buuhoodle		Buuhoodle	8.2516	46.3157	1	Local Source	Local	Troops loyal to Kayse Abdi Yusuf a former SSC leader who recently defected to SL and are currently supported by SL were attacked by troops loyal to Puntland Minister of Fisheries in Widh-Widh area. The forces of the PL minister were repelled and withdrew back to Buuhodle.	0	1561469335	SOM
5322337	706	SOM7175	7175	2011-04-09	2011	1	Battles	Armed clash	Unidentified Armed Group (Somalia)		3	33	Eastern Africa	Somalia	Togdheer	Buuhoodle		Buuhoodle	8.2516	46.3157	1	Local Source	Local	Troops loyal to Kayse Abdi Yusuf a former SSC leader who recently defected to SL and are currently supported by SL were attacked by troops loyal to Puntland Minister of Fisheries in Widh-Widh area. The forces of the PL minister were repelled and withdrew back to Buuhodle.	0	1561469335	SOM
5322335	706	SOM7173	7173	2011-04-09	2011	1	Battles	Armed clash	ASWJ: Ahlu Sunna Wal Jamaa		3	23	Eastern Africa	Somalia	Gedo	Baardheere		Kureed	2.24	42.33	1	Local Source	Local	Fighting between ASWJ/pro-TFG troops and AS has taken place Kureedka (about 6 Km towards Bardale)	0	1561469335	SOM
5322334	706	SOM7172	7172	2011-04-09	2011	1	Explosions/Remote violence	Grenade	Unidentified Armed Group (Somalia)		3	13	Eastern Africa	Somalia	Sool	Laas Caanood		Laascaanood	8.4774	47.3597	1	Local Source	Local	Unidentified man hurled a hand grenade into the Central Police Station in Laasanood. Three persons including the Commander of the Station Ali Ahmed Shire were injured. The perpetrator escaped the scene. Unconfirmed reports suggest that SL forces later captured several suspects.	0	1561469335	SOM
5322334	706	SOM7172	7172	2011-04-09	2011	1	Explosions/Remote violence	Grenade	Police Forces of Somaliland (2010-)		1	13	Eastern Africa	Somalia	Sool	Laas Caanood		Laascaanood	8.4774	47.3597	1	Local Source	Local	Unidentified man hurled a hand grenade into the Central Police Station in Laasanood. Three persons including the Commander of the Station Ali Ahmed Shire were injured. The perpetrator escaped the scene. Unconfirmed reports suggest that SL forces later captured several suspects.	0	1561469335	SOM
5322344	706	SOM7182	7182	2011-04-10	2011	1	Battles	Armed clash	Al Shabaab		2	12	Eastern Africa	Somalia	Banadir	Banadir		Hodan	2.0333	45.35	1	Local Source	Local	AS launched an attack on TFG/AMISOM positions at the above mentioned areas. The fighting started in Boondheere in the evening of 9th April and continued until the morning of 10th April. 3 civilians were reported dead and 6 others injured.	0	1561469335	SOM
5322343	706	SOM7181	7181	2011-04-10	2011	1	Battles	Armed clash	Al Shabaab		2	12	Eastern Africa	Somalia	Banadir	Banadir		Hodan	2.0333	45.35	1	Local Source	Local	AS launched an attack against TFG/AMISOM positions at the former Ministry of Defense, Ali Aliyow and Dabka.	0	1561469335	SOM
5322342	706	SOM7180	7180	2011-04-10	2011	1	Battles	Armed clash	Al Shabaab		2	12	Eastern Africa	Somalia	Banadir	Banadir		Hawl Wadaag	2.048	45.32	1	Local Source	Local	AS launched an attack on TFG/AMISOM positions at the above mentioned areas. The fighting started in Boondheere in the evening of 9th April and continued until the morning of 10th April. 3 civilians were reported dead and 6 others injured.	0	1561469335	SOM
5322341	706	SOM7179	7179	2011-04-10	2011	1	Battles	Armed clash	Al Shabaab		2	12	Eastern Africa	Somalia	Banadir	Banadir		Hawl Wadaag	2.048	45.32	1	Local Source	Local	AS launched an attack against TFG/AMISOM positions at the former Ministry of Defense, Ali Aliyow and Dabka.	0	1561469335	SOM
5322340	706	SOM7178	7178	2011-04-10	2011	1	Battles	Armed clash	Al Shabaab		2	12	Eastern Africa	Somalia	Banadir	Banadir		Daynile	2.0581	45.3003	1	Local Source	Local	AS launched an attack against TFG/AMISOM positions at the former Ministry of Defense, Ali Aliyow and Dabka.	0	1561469335	SOM
5322338	706	SOM7176	7176	2011-04-10	2011	1	Battles	Armed clash	Al Shabaab		2	12	Eastern Africa	Somalia	Banadir	Banadir		Bondhere	2.0456	45.34	1	Local Source	Local	AS launched an attack on TFG/AMISOM positions at the above mentioned areas. The fighting started in Boondheere in the evening of 9th April and continued until the morning of 10th April. 3 civilians were reported dead and 6 others injured.	0	1561469335	SOM
5322339	706	SOM7177	7177	2011-04-10	2011	1	Battles	Armed clash	Al Shabaab		2	12	Eastern Africa	Somalia	Banadir	Banadir		Bondhere	2.0456	45.34	1	Local Source	Local	Sporadic armed clashes between TFG/AMISOM troops and AS militants were reported from Boondheere after AS launched an attack against TFG/AMISOM positions at the former Ministry of Interior. Information about causalities were not available following the clashes.	0	1561469335	SOM
5322347	706	SOM7185	7185	2011-04-10	2011	1	Explosions/Remote violence	Shelling/artillery/missile attack	AMISOM: African Union Mission in Somalia (2007-)		8	78	Eastern Africa	Somalia	Banadir	Banadir		Hodan	2.0333	45.35	1	Local Source	Local	Several mortars reportedly fired by the TFG/AMISOM hit Bakara Marker Road Junction. 3 civilians were reported killed and several others injured.	3	1561469335	SOM
5322347	706	SOM7185	7185	2011-04-10	2011	1	Explosions/Remote violence	Shelling/artillery/missile attack	Civilians (Somalia)		7	78	Eastern Africa	Somalia	Banadir	Banadir		Hodan	2.0333	45.35	1	Local Source	Local	Several mortars reportedly fired by the TFG/AMISOM hit Bakara Marker Road Junction. 3 civilians were reported killed and several others injured.	3	1561469335	SOM
5322346	706	SOM7184	7184	2011-04-10	2011	1	Explosions/Remote violence	Remote explosive/landmine/IED	Unidentified Armed Group (Somalia)		3	37	Eastern Africa	Somalia	Bakool	Ceel Barde		Ato	4.6205	43.3502	1	Local Source	Local	Three Elders have been reported injured after a land mine exploded under their car between Ato and Elberde. The Elders were assessing the drought situation in Bakool region at the time of the incident.	0	1561469335	SOM
5322346	706	SOM7184	7184	2011-04-10	2011	1	Explosions/Remote violence	Remote explosive/landmine/IED	Civilians (Somalia)		7	37	Eastern Africa	Somalia	Bakool	Ceel Barde		Ato	4.6205	43.3502	1	Local Source	Local	Three Elders have been reported injured after a land mine exploded under their car between Ato and Elberde. The Elders were assessing the drought situation in Bakool region at the time of the incident.	0	1561469335	SOM
5322344	706	SOM7182	7182	2011-04-10	2011	1	Battles	Armed clash	Military Forces of Somalia (2004-2012)	AMISOM: African Union Mission in Somalia (2007-)	1	12	Eastern Africa	Somalia	Banadir	Banadir		Hodan	2.0333	45.35	1	Local Source	Local	AS launched an attack on TFG/AMISOM positions at the above mentioned areas. The fighting started in Boondheere in the evening of 9th April and continued until the morning of 10th April. 3 civilians were reported dead and 6 others injured.	0	1561469335	SOM
5322343	706	SOM7181	7181	2011-04-10	2011	1	Battles	Armed clash	Military Forces of Somalia (2004-2012)	AMISOM: African Union Mission in Somalia (2007-)	1	12	Eastern Africa	Somalia	Banadir	Banadir		Hodan	2.0333	45.35	1	Local Source	Local	AS launched an attack against TFG/AMISOM positions at the former Ministry of Defense, Ali Aliyow and Dabka.	0	1561469335	SOM
5322342	706	SOM7180	7180	2011-04-10	2011	1	Battles	Armed clash	Military Forces of Somalia (2004-2012)	AMISOM: African Union Mission in Somalia (2007-)	1	12	Eastern Africa	Somalia	Banadir	Banadir		Hawl Wadaag	2.048	45.32	1	Local Source	Local	AS launched an attack on TFG/AMISOM positions at the above mentioned areas. The fighting started in Boondheere in the evening of 9th April and continued until the morning of 10th April. 3 civilians were reported dead and 6 others injured.	0	1561469335	SOM
5322341	706	SOM7179	7179	2011-04-10	2011	1	Battles	Armed clash	Military Forces of Somalia (2004-2012)	AMISOM: African Union Mission in Somalia (2007-)	1	12	Eastern Africa	Somalia	Banadir	Banadir		Hawl Wadaag	2.048	45.32	1	Local Source	Local	AS launched an attack against TFG/AMISOM positions at the former Ministry of Defense, Ali Aliyow and Dabka.	0	1561469335	SOM
5322340	706	SOM7178	7178	2011-04-10	2011	1	Battles	Armed clash	Military Forces of Somalia (2004-2012)	AMISOM: African Union Mission in Somalia (2007-)	1	12	Eastern Africa	Somalia	Banadir	Banadir		Daynile	2.0581	45.3003	1	Local Source	Local	AS launched an attack against TFG/AMISOM positions at the former Ministry of Defense, Ali Aliyow and Dabka.	0	1561469335	SOM
5322338	706	SOM7176	7176	2011-04-10	2011	1	Battles	Armed clash	Military Forces of Somalia (2004-2012)	AMISOM: African Union Mission in Somalia (2007-)	1	12	Eastern Africa	Somalia	Banadir	Banadir		Bondhere	2.0456	45.34	1	Local Source	Local	AS launched an attack on TFG/AMISOM positions at the above mentioned areas. The fighting started in Boondheere in the evening of 9th April and continued until the morning of 10th April. 3 civilians were reported dead and 6 others injured.	0	1561469335	SOM
5322339	706	SOM7177	7177	2011-04-10	2011	1	Battles	Armed clash	Military Forces of Somalia (2004-2012)	AMISOM: African Union Mission in Somalia (2007-)	1	12	Eastern Africa	Somalia	Banadir	Banadir		Bondhere	2.0456	45.34	1	Local Source	Local	Sporadic armed clashes between TFG/AMISOM troops and AS militants were reported from Boondheere after AS launched an attack against TFG/AMISOM positions at the former Ministry of Interior. Information about causalities were not available following the clashes.	0	1561469335	SOM
5322345	706	SOM7183	7183	2011-04-10	2011	1	Explosions/Remote violence	Remote explosive/landmine/IED	Unidentified Armed Group (Somalia)		3	13	Eastern Africa	Somalia	Gedo	Doolow		Bula Hawa	3.9276	41.8742	1	Local Source	Local	RCIED attack has reportedly targeted a vehicle carrying high representatives of the ENDF. Unconfirmed reports suggest that three ENDF officials sustained minor injuries in the explosion. TFG forces opened fire following the explosion and killed one person. Two other individuals were subsequently arrested. AS claimed responsibility for the attack.	0	1561469335	SOM
5322345	706	SOM7183	7183	2011-04-10	2011	1	Explosions/Remote violence	Remote explosive/landmine/IED	Military Forces of Somalia (2004-2012)	Military Forces of Ethiopia (1995-2018)	1	13	Eastern Africa	Somalia	Gedo	Doolow		Bula Hawa	3.9276	41.8742	1	Local Source	Local	RCIED attack has reportedly targeted a vehicle carrying high representatives of the ENDF. Unconfirmed reports suggest that three ENDF officials sustained minor injuries in the explosion. TFG forces opened fire following the explosion and killed one person. Two other individuals were subsequently arrested. AS claimed responsibility for the attack.	0	1561469335	SOM
5322350	706	SOM7188	7188	2011-04-11	2011	1	Explosions/Remote violence	Shelling/artillery/missile attack	Al Shabaab		2	12	Eastern Africa	Somalia	Banadir	Banadir		Wardhigley	2.0549	45.33	1	Local Source	Local	TFG/AMISOM positions in Wardighigley and Bondhere districts were attacked by mortar fire by AS. One mortar exploded at the compound of the Presidential Palace injuring four (one TFG soldier) and three others landed in proximity to it.	0	1561469335	SOM
5322349	706	SOM7187	7187	2011-04-11	2011	1	Explosions/Remote violence	Shelling/artillery/missile attack	Al Shabaab		2	12	Eastern Africa	Somalia	Banadir	Banadir		Bondhere	2.0456	45.34	1	Local Source	Local	TFG/AMISOM positions in Wardighigley and Bondhere districts were attacked by mortar fire by AS. One mortar exploded at the compound of the Presidential Palace injuring four (one TFG soldier) and three others landed in proximity to it.	0	1561469335	SOM
5322352	706	SOM7190	7190	2011-04-11	2011	1	Explosions/Remote violence	Grenade	Unidentified Armed Group (Somalia)		3	37	Eastern Africa	Somalia	Banadir	Banadir		Wadajir	2.0462	45.3341	1	Local Source	Local	A UN office was attacked with a hand grenade which exploded outside of the perimeter wall. The perpetrator escaped unidentified. The motive for the attack is not currently known.	0	1561469335	SOM
5322352	706	SOM7190	7190	2011-04-11	2011	1	Explosions/Remote violence	Grenade	Civilians (Somalia)		7	37	Eastern Africa	Somalia	Banadir	Banadir		Wadajir	2.0462	45.3341	1	Local Source	Local	A UN office was attacked with a hand grenade which exploded outside of the perimeter wall. The perpetrator escaped unidentified. The motive for the attack is not currently known.	0	1561469335	SOM
5322350	706	SOM7188	7188	2011-04-11	2011	1	Explosions/Remote violence	Shelling/artillery/missile attack	Military Forces of Somalia (2004-2012)	AMISOM: African Union Mission in Somalia (2007-)	1	12	Eastern Africa	Somalia	Banadir	Banadir		Wardhigley	2.0549	45.33	1	Local Source	Local	TFG/AMISOM positions in Wardighigley and Bondhere districts were attacked by mortar fire by AS. One mortar exploded at the compound of the Presidential Palace injuring four (one TFG soldier) and three others landed in proximity to it.	0	1561469335	SOM
5322349	706	SOM7187	7187	2011-04-11	2011	1	Explosions/Remote violence	Shelling/artillery/missile attack	Military Forces of Somalia (2004-2012)	AMISOM: African Union Mission in Somalia (2007-)	1	12	Eastern Africa	Somalia	Banadir	Banadir		Bondhere	2.0456	45.34	1	Local Source	Local	TFG/AMISOM positions in Wardighigley and Bondhere districts were attacked by mortar fire by AS. One mortar exploded at the compound of the Presidential Palace injuring four (one TFG soldier) and three others landed in proximity to it.	0	1561469335	SOM
5322351	706	SOM7189	7189	2011-04-11	2011	1	Battles	Armed clash	Pirates (Somalia)		3	33	Eastern Africa	Somalia	Mudug	Jariiban		Garcad	6.9447	49.3265	1	Local Source	Local	Shootout between pirates was reported from Ceel Dhanane. One of the pirates was reported killed and five others injured. The shootout is believed to have been linked to a dispute over a pick-up truck that was meant to travel to Galkacyo to purchase Khat.	0	1561469335	SOM
5322351	706	SOM7189	7189	2011-04-11	2011	1	Battles	Armed clash	Pirates (Somalia)		3	33	Eastern Africa	Somalia	Mudug	Jariiban		Garcad	6.9447	49.3265	1	Local Source	Local	Shootout between pirates was reported from Ceel Dhanane. One of the pirates was reported killed and five others injured. The shootout is believed to have been linked to a dispute over a pick-up truck that was meant to travel to Galkacyo to purchase Khat.	0	1561469335	SOM
5322348	706	SOM7186	7186	2011-04-11	2011	1	Protests	Peaceful protest	Protesters (Somalia)		6	60	Eastern Africa	Somalia	Mudug	Gaalkacyo		Gaalkacyo	6.7697	47.4308	1	Local Source	Local	About a hundred of residents of North Galkacyo gathered to show their opposition to trial of Gen Samatar in USA. General Samatar is a former Minster of Defense and an Attorney General of the Siad Barre regime. Gen. Samatar was accused of war crimes and torture in 2004 but his case was dismissed in 2007 on the grounds that he has immunity under the federal laws. Last year the case was sent back to…	0	1561469335	SOM
5322357	706	SOM7195	7195	2011-04-12	2011	1	Explosions/Remote violence	Shelling/artillery/missile attack	Al Shabaab		2	28	Eastern Africa	Somalia	Lower Shabelle	Afgooye		Madiina	2.2204	45.2259	1	Local Source	Local	5 Mortar rounds were fired by AS towards Villa Baidoa. One mortar exploded in front of the gate to the Medina Hospital injuring 2 security guards. 3 other rounds landed inside the hospital but at least 2 of them failed to detonate. The 5th round hit police buildings adjacent to the hospital, killing 3 civilians and injuring 5 others. AMISOM responded to the attack by firing several rounds in the …	0	1561469335	SOM
5322354	706	SOM7192	7192	2011-04-12	2011	1	Battles	Armed clash	Al Shabaab		2	12	Eastern Africa	Somalia	Banadir	Banadir		Bondhere	2.0456	45.34	1	Local Source	Local	Sporadic fighting and shelling between TFG/AMISOM troops and AS fighters was reported from the Former Ministry of Interior. The fighting started after AS attacked TFG/AMISOM positions. Causalities are currently unknown.	0	1561469335	SOM
5322356	706	SOM7194	7194	2011-04-12	2011	1	Battles	Armed clash	Al Shabaab		2	12	Eastern Africa	Somalia	Banadir	Banadir		Hodan	2.0333	45.35	1	Local Source	Local	A light armed clash between TFG/AMISOM troop and AS militants was reported from the former Ministry of Defense and the Milk Factory area in Hodan District. Casualties could not be established.	0	1561469335	SOM
5322355	706	SOM7193	7193	2011-04-12	2011	1	Battles	Armed clash	Al Shabaab		2	12	Eastern Africa	Somalia	Banadir	Banadir		Dharkenley	2.0095	45.25	1	Local Source	Local	TFG Security Forces and AS clashed at Km8 checkpoint (Sarkuus Checkpoint) after AS attacked TFG positions. The fighting lasted for about an hour. Causalities are currently unknown.	0	1561469335	SOM
5322357	706	SOM7195	7195	2011-04-12	2011	1	Explosions/Remote violence	Shelling/artillery/missile attack	AMISOM: African Union Mission in Somalia (2007-)		8	28	Eastern Africa	Somalia	Lower Shabelle	Afgooye		Madiina	2.2204	45.2259	1	Local Source	Local	5 Mortar rounds were fired by AS towards Villa Baidoa. One mortar exploded in front of the gate to the Medina Hospital injuring 2 security guards. 3 other rounds landed inside the hospital but at least 2 of them failed to detonate. The 5th round hit police buildings adjacent to the hospital, killing 3 civilians and injuring 5 others. AMISOM responded to the attack by firing several rounds in the …	0	1561469335	SOM
5322354	706	SOM7192	7192	2011-04-12	2011	1	Battles	Armed clash	Military Forces of Somalia (2004-2012)	AMISOM: African Union Mission in Somalia (2007-)	1	12	Eastern Africa	Somalia	Banadir	Banadir		Bondhere	2.0456	45.34	1	Local Source	Local	Sporadic fighting and shelling between TFG/AMISOM troops and AS fighters was reported from the Former Ministry of Interior. The fighting started after AS attacked TFG/AMISOM positions. Causalities are currently unknown.	0	1561469335	SOM
5322356	706	SOM7194	7194	2011-04-12	2011	1	Battles	Armed clash	Military Forces of Somalia (2004-2012)	AMISOM: African Union Mission in Somalia (2007-)	1	12	Eastern Africa	Somalia	Banadir	Banadir		Hodan	2.0333	45.35	1	Local Source	Local	A light armed clash between TFG/AMISOM troop and AS militants was reported from the former Ministry of Defense and the Milk Factory area in Hodan District. Casualties could not be established.	0	1561469335	SOM
5322355	706	SOM7193	7193	2011-04-12	2011	1	Battles	Armed clash	Military Forces of Somalia (2004-2012)		1	12	Eastern Africa	Somalia	Banadir	Banadir		Dharkenley	2.0095	45.25	1	Local Source	Local	TFG Security Forces and AS clashed at Km8 checkpoint (Sarkuus Checkpoint) after AS attacked TFG positions. The fighting lasted for about an hour. Causalities are currently unknown.	0	1561469335	SOM
5322353	706	SOM7191	7191	2011-04-12	2011	1	Protests	Peaceful protest	Protesters (Somalia)	Women (Somalia)	6	60	Eastern Africa	Somalia	Banadir	Banadir		Xamar Weyne	2.0337	45.34	1	Local Source	Local	Hundreds of people gathered to show their opposition to the Consultative Meeting on the Somali peace process held in Nairobi. The demonstration was organized by Somali women and youth associations. The demonstrators also celebrated the 51st anniversary of Somali Military.	0	1561469335	SOM
5322359	706	SOM7197	7197	2011-04-13	2011	2	Violence against civilians	Attack	Al Shabaab		2	27	Eastern Africa	Somalia	Lower Juba	Kismaayo		Kismayo	-0.3603	42.5463	1	US State Department	Other	Al-Shabaab ordered relatives of an individual accused of spying to collect his beheaded corpse from a Kismayo hospital two weeks after kidnapping him from his house.	1	1561469335	SOM
5322358	706	SOM7196	7196	2011-04-13	2011	1	Explosions/Remote violence	Remote explosive/landmine/IED	Al Shabaab		2	27	Eastern Africa	Somalia	Lower Juba	Afmadow		Afmadow	0.5172	42.071	1	Local Source	Local	An explosive device planted on the road between Kismayo and Afmadow district exploded under a transport truck. One passenger was reported killed and 3 others injured. The device (probably land mine) is believed to have been planted by AS as a part of the defense strategy against the offensive of anti-AS forces	1	1561469335	SOM
5322359	706	SOM7197	7197	2011-04-13	2011	2	Violence against civilians	Attack	Civilians (Somalia)		7	27	Eastern Africa	Somalia	Lower Juba	Kismaayo		Kismayo	-0.3603	42.5463	1	US State Department	Other	Al-Shabaab ordered relatives of an individual accused of spying to collect his beheaded corpse from a Kismayo hospital two weeks after kidnapping him from his house.	1	1561469335	SOM
5322358	706	SOM7196	7196	2011-04-13	2011	1	Explosions/Remote violence	Remote explosive/landmine/IED	Civilians (Somalia)		7	27	Eastern Africa	Somalia	Lower Juba	Afmadow		Afmadow	0.5172	42.071	1	Local Source	Local	An explosive device planted on the road between Kismayo and Afmadow district exploded under a transport truck. One passenger was reported killed and 3 others injured. The device (probably land mine) is believed to have been planted by AS as a part of the defense strategy against the offensive of anti-AS forces	1	1561469335	SOM
5322360	706	SOM7198	7198	2011-04-14	2011	1	Violence against civilians	Attack	Al Shabaab		2	27	Eastern Africa	Somalia	Lower Juba	Kismaayo		Kismayo	-0.3603	42.5463	1	Local Source	Local	AS killed the Former Juba Valley Alliance senior officer, the body was found at the Kismayo Hospital. The officer alongside 6 other elders were arrested by AS in their houses last week. Whereabouts of the six remaining elders are unknown.	1	1561469335	SOM
5322360	706	SOM7198	7198	2011-04-14	2011	1	Violence against civilians	Attack	Civilians (Somalia)		7	27	Eastern Africa	Somalia	Lower Juba	Kismaayo		Kismayo	-0.3603	42.5463	1	Local Source	Local	AS killed the Former Juba Valley Alliance senior officer, the body was found at the Kismayo Hospital. The officer alongside 6 other elders were arrested by AS in their houses last week. Whereabouts of the six remaining elders are unknown.	1	1561469335	SOM
5322361	706	SOM7199	7199	2011-04-15	2011	2	Battles	Armed clash	Al Shabaab		2	12	Eastern Africa	Somalia	Banadir	Banadir		Mogadishu	2.0414	45.3337	1	Local Source	Local	Mogadishu frontlines remained stagnant with recurring armed clashes and shelling between TFG/AMISOM troops and AS. No territorial gains were observed within the reporting period.	0	1561469335	SOM
5322362	706	SOM7200	7200	2011-04-15	2011	1	Battles	Armed clash	ASWJ: Ahlu Sunna Wal Jamaa		3	34	Eastern Africa	Somalia	Galgaduud	Cabudwaaq		Balanbale	5.689	45.9693	1	Local Source	Local	ASWJ was attacked by Reer Siyad Hussein sub-clan of Darood/Marehan. The sub-clan was reportedly dissatisfied with ASWJs handling of mediation of conflict over water resources between Reer Siyad Hussein and Reer Kooshin sub-clans of Darood/Marehan. 2 people were reportedly submitted to Guri-cel hospital, 7 to Cabud Waaq. The badly injured were brought to Galkacyo hospital. The exact Number of dead…	0	1561469335	SOM
5322362	706	SOM7200	7200	2011-04-15	2011	1	Battles	Armed clash	Darood-Marehan Sub-Clan Militia (Somalia)		4	34	Eastern Africa	Somalia	Galgaduud	Cabudwaaq		Balanbale	5.689	45.9693	1	Local Source	Local	ASWJ was attacked by Reer Siyad Hussein sub-clan of Darood/Marehan. The sub-clan was reportedly dissatisfied with ASWJs handling of mediation of conflict over water resources between Reer Siyad Hussein and Reer Kooshin sub-clans of Darood/Marehan. 2 people were reportedly submitted to Guri-cel hospital, 7 to Cabud Waaq. The badly injured were brought to Galkacyo hospital. The exact Number of dead…	0	1561469335	SOM
5322364	706	SOM7202	7202	2011-04-15	2011	1	Violence against civilians	Attack	Unidentified Armed Group (Somalia)		3	37	Eastern Africa	Somalia	Galgaduud	Dhuusamarreeb		Dhuusamarreeb	5.5376	46.3867	1	Local Source	Local	Dahir Rage Eyrow a prominent elder was assassinated by an unknown gunman. The motive of the attack is unknown. Abdurrahman Gedi Qarow Dhusamareb ASWJ DC stated that ASWJ is conducting operations to find the killer.	1	1561469335	SOM
5322364	706	SOM7202	7202	2011-04-15	2011	1	Violence against civilians	Attack	Civilians (Somalia)		7	37	Eastern Africa	Somalia	Galgaduud	Dhuusamarreeb		Dhuusamarreeb	5.5376	46.3867	1	Local Source	Local	Dahir Rage Eyrow a prominent elder was assassinated by an unknown gunman. The motive of the attack is unknown. Abdurrahman Gedi Qarow Dhusamareb ASWJ DC stated that ASWJ is conducting operations to find the killer.	1	1561469335	SOM
5322361	706	SOM7199	7199	2011-04-15	2011	2	Battles	Armed clash	Military Forces of Somalia (2004-2012)	AMISOM: African Union Mission in Somalia (2007-)	1	12	Eastern Africa	Somalia	Banadir	Banadir		Mogadishu	2.0414	45.3337	1	Local Source	Local	Mogadishu frontlines remained stagnant with recurring armed clashes and shelling between TFG/AMISOM troops and AS. No territorial gains were observed within the reporting period.	0	1561469335	SOM
5322363	706	SOM7201	7201	2011-04-15	2011	1	Protests	Protest with intervention	Military Forces of Somalia (2004-2012)		1	16	Eastern Africa	Somalia	Banadir	Banadir		Bondhere	2.0456	45.34	1	Local Source	Local	A demonstration attended mainly by IDP women and children from Shangaani district was organized in support of the UNPOS organized Consultative Meeting in Nairobi. Two groups of TFG soldiers (one supportive and the other opposed to the demonstration) exchanged fire during the protest. Two people including one TFG soldier were killed and a number of others were injured. Unconfirmed reports indicate…	0	1561469335	SOM
5322363	706	SOM7201	7201	2011-04-15	2011	1	Protests	Protest with intervention	Protesters (Somalia)	Women (Somalia)	6	16	Eastern Africa	Somalia	Banadir	Banadir		Bondhere	2.0456	45.34	1	Local Source	Local	A demonstration attended mainly by IDP women and children from Shangaani district was organized in support of the UNPOS organized Consultative Meeting in Nairobi. Two groups of TFG soldiers (one supportive and the other opposed to the demonstration) exchanged fire during the protest. Two people including one TFG soldier were killed and a number of others were injured. Unconfirmed reports indicate…	0	1561469335	SOM
5322367	706	SOM7205	7205	2011-04-16	2011	1	Riots	Mob violence	Rioters (Somalia)		5	57	Eastern Africa	Somalia	Mudug	Gaalkacyo		Gaalkacyo	6.7697	47.4308	1	Local Source	Local	Faruq Mosque in Galsor Village was attacked on the morning of 17th April by followers of Sheikh Ismail Hashi Hussein. One person was reported dead and two others injured.	1	1561469335	SOM
5322367	706	SOM7205	7205	2011-04-16	2011	1	Riots	Mob violence	Civilians (Somalia)	Muslim Group (Somalia)	7	57	Eastern Africa	Somalia	Mudug	Gaalkacyo		Gaalkacyo	6.7697	47.4308	1	Local Source	Local	Faruq Mosque in Galsor Village was attacked on the morning of 17th April by followers of Sheikh Ismail Hashi Hussein. One person was reported dead and two others injured.	1	1561469335	SOM
5322369	706	SOM7207	7207	2011-04-16	2011	1	Riots	Mob violence	Rioters (Somalia)		5	57	Eastern Africa	Somalia	Mudug	Gaalkacyo		Gaalkacyo	6.7697	47.4308	1	Local Source	Local	Salahudun mosque in Garsor village was attacked on the night between the 16th and 17th April by followers of Sheikh Ismail Hashi Hussein. At least 3 people were killed and 9 injured. One of the injured is believed to be a radical cleric Sheikh Ismail (not to be mistaken for ASWJs Sheikh Ismail Hashi Hussein).	3	1561469335	SOM
5322369	706	SOM7207	7207	2011-04-16	2011	1	Riots	Mob violence	Civilians (Somalia)	Muslim Group (Somalia)	7	57	Eastern Africa	Somalia	Mudug	Gaalkacyo		Gaalkacyo	6.7697	47.4308	1	Local Source	Local	Salahudun mosque in Garsor village was attacked on the night between the 16th and 17th April by followers of Sheikh Ismail Hashi Hussein. At least 3 people were killed and 9 injured. One of the injured is believed to be a radical cleric Sheikh Ismail (not to be mistaken for ASWJs Sheikh Ismail Hashi Hussein).	3	1561469335	SOM
5322365	706	SOM7203	7203	2011-04-16	2011	1	Strategic developments	Change to group/activity	Police Forces of Somaliland (2010-)		1	10	Eastern Africa	Somalia	Woqooyi Galbeed	Hargeysa		Hargeysa	9.5598	44.0668	1	Local Source	Local	Movement of forces: 34 SL Police Officers stationed in Lascanood left the town and arrived to Hargeisa without being authorized to do so.	0	1561469335	SOM
5322371	706	SOM7209	7209	2011-04-16	2011	1	Violence against civilians	Attack	Unidentified Armed Group (Somalia)		3	37	Eastern Africa	Somalia	Mudug	Gaalkacyo		Gaalkacyo	6.7697	47.4308	1	Local Source	Local	During the night between the 16th and 17th, two mosques (Salahudun and Bukare in Garsor village) were attacked by the followers of Sheikh Ismail Haji Hussein. At least 3 people were killed and 9 wounded. In the case of the Salahudun mosque Attack, it is reported the perpetrators stood at the doors and windows of the Mosque and started shouting. (believed to be ASWJ). During the same night, Sheikh…	3	1561469335	SOM
5322371	706	SOM7209	7209	2011-04-16	2011	1	Violence against civilians	Attack	Civilians (Somalia)		7	37	Eastern Africa	Somalia	Mudug	Gaalkacyo		Gaalkacyo	6.7697	47.4308	1	Local Source	Local	During the night between the 16th and 17th, two mosques (Salahudun and Bukare in Garsor village) were attacked by the followers of Sheikh Ismail Haji Hussein. At least 3 people were killed and 9 wounded. In the case of the Salahudun mosque Attack, it is reported the perpetrators stood at the doors and windows of the Mosque and started shouting. (believed to be ASWJ). During the same night, Sheikh…	3	1561469335	SOM
5322366	706	SOM7204	7204	2011-04-16	2011	1	Riots	Violent demonstration	Rioters (Somalia)		5	50	Eastern Africa	Somalia	Mudug	Gaalkacyo		Gaalkacyo	6.7697	47.4308	1	Local Source	Local	A demonstration occurred in North Galkacyo following the killing of Sheikh Ismail Hashi Hussein. The demonstrators reportedly threw stones at commercial buildings, burned tires and chanted slogans accusing the Puntland Authorities of failing to protect its citizens.	0	1561469335	SOM
5322368	706	SOM7206	7206	2011-04-16	2011	1	Riots	Violent demonstration	Rioters (Somalia)		5	50	Eastern Africa	Somalia	Mudug	Gaalkacyo		Gaalkacyo	6.7697	47.4308	1	Local Source	Local	On the 16th in the same afternoon, following the death of Sheikh Ismail Haji Hussein, a demonstration occurred in Galkayo, The demonstrators reportedly threw stones at the business areas, burned tires and chanted slogans against Puntland Authorities failure to protect its citizens.	0	1561469335	SOM
5322370	706	SOM7208	7208	2011-04-16	2011	1	Protests	Peaceful protest	Protesters (Somalia)	Women (Somalia)	6	60	Eastern Africa	Somalia	Nugaal	Garoowe		Garowe	8.4064	48.4819	1	Local Source	Local	Around a hundred people including women, businessmen and intellectuals gathered to show their support for the high level Consultative Meeting in Nairobi.	0	1561469335	SOM
5322376	706	SOM7214	7214	2011-04-17	2011	1	Battles	Armed clash	Al Shabaab		2	12	Eastern Africa	Somalia	Banadir	Banadir		Hodan	2.0333	45.35	1	Local Source	Local	TFG/AMISOM troops attacked AS positions in Hodan, Hawl Wadag, and Boondheere districts. AS military spokesman Sheikh Abdi Aziz Abu Musab described the attacks as "cowardly ambushes." The number of casualties is currently unknown.	0	1561469335	SOM
5322375	706	SOM7213	7213	2011-04-17	2011	1	Battles	Armed clash	Al Shabaab		2	12	Eastern Africa	Somalia	Banadir	Banadir		Hawl Wadaag	2.048	45.32	1	Local Source	Local	TFG/AMISOM troops attacked AS positions in Hodan, Hawl Wadag, and Boondheere districts. AS military spokesman Sheikh Abdi Aziz Abu Musab described the attacks as "cowardly ambushes." The number of casualties is currently unknown.	0	1561469335	SOM
5322374	706	SOM7212	7212	2011-04-17	2011	1	Battles	Armed clash	Al Shabaab		2	12	Eastern Africa	Somalia	Banadir	Banadir		Bondhere	2.0456	45.34	1	Local Source	Local	TFG/AMISOM troops attacked AS positions in Hodan, Hawl Wadag, and Boondheere districts. AS military spokesman Sheikh Abdi Aziz Abu Musab described the attacks as "cowardly ambushes." The number of casualties is currently unknown.	0	1561469335	SOM
5322376	706	SOM7214	7214	2011-04-17	2011	1	Battles	Armed clash	Military Forces of Somalia (2004-2012)	AMISOM: African Union Mission in Somalia (2007-)	1	12	Eastern Africa	Somalia	Banadir	Banadir		Hodan	2.0333	45.35	1	Local Source	Local	TFG/AMISOM troops attacked AS positions in Hodan, Hawl Wadag, and Boondheere districts. AS military spokesman Sheikh Abdi Aziz Abu Musab described the attacks as "cowardly ambushes." The number of casualties is currently unknown.	0	1561469335	SOM
5322375	706	SOM7213	7213	2011-04-17	2011	1	Battles	Armed clash	Military Forces of Somalia (2004-2012)	AMISOM: African Union Mission in Somalia (2007-)	1	12	Eastern Africa	Somalia	Banadir	Banadir		Hawl Wadaag	2.048	45.32	1	Local Source	Local	TFG/AMISOM troops attacked AS positions in Hodan, Hawl Wadag, and Boondheere districts. AS military spokesman Sheikh Abdi Aziz Abu Musab described the attacks as "cowardly ambushes." The number of casualties is currently unknown.	0	1561469335	SOM
5322374	706	SOM7212	7212	2011-04-17	2011	1	Battles	Armed clash	Military Forces of Somalia (2004-2012)	AMISOM: African Union Mission in Somalia (2007-)	1	12	Eastern Africa	Somalia	Banadir	Banadir		Bondhere	2.0456	45.34	1	Local Source	Local	TFG/AMISOM troops attacked AS positions in Hodan, Hawl Wadag, and Boondheere districts. AS military spokesman Sheikh Abdi Aziz Abu Musab described the attacks as "cowardly ambushes." The number of casualties is currently unknown.	0	1561469335	SOM
5322377	706	SOM7215	7215	2011-04-17	2011	1	Battles	Armed clash	Darood-Leelkayse Sub-Clan Militia (Somalia)		4	14	Eastern Africa	Somalia	Mudug	Gaalkacyo		Gaalkacyo	6.7697	47.4308	1	Local Source	Local	A clash between Darood/Laylakase militia and Galmudug Police was reported from Galkayo. One person was reported dead and another one injured. The clash occurred following a burial of one person that died in the violence in North Galkayo earlier that day. The burial took place in a vicinity of a South Galkayo checkpoint to which the Galmudug Police Officers responded by shooting. Following the cla…	1	1561469335	SOM
5322377	706	SOM7215	7215	2011-04-17	2011	1	Battles	Armed clash	Police Forces of Somalia (2004-2012) Galmudug Administration		1	14	Eastern Africa	Somalia	Mudug	Gaalkacyo		Gaalkacyo	6.7697	47.4308	1	Local Source	Local	A clash between Darood/Laylakase militia and Galmudug Police was reported from Galkayo. One person was reported dead and another one injured. The clash occurred following a burial of one person that died in the violence in North Galkayo earlier that day. The burial took place in a vicinity of a South Galkayo checkpoint to which the Galmudug Police Officers responded by shooting. Following the cla…	1	1561469335	SOM
5322372	706	SOM7210	7210	2011-04-17	2011	1	Strategic developments	Change to group/activity	Darood-Leelkayse Sub-Clan Militia (Somalia)		4	40	Eastern Africa	Somalia	Mudug	Gaalkacyo		Gaalkacyo	6.7697	47.4308	1	Local Source	Local	Movement of forces: The violence of the 16th and 17th April also translated into worsening of relations of the Darood/Laylakase and Darood/Majerteen. The Darood/Laylakase who inhabit the Garsor village and several of their clansmen died in the Mosque attacks reportedly started reinforcing their clan militias in the town. The situation between the Laylakase and the Majerteen was reported to have r…	0	1561469335	SOM
5322378	706	SOM7216	7216	2011-04-17	2011	1	Battles	Armed clash	Military Forces of Somalia (2004-2012) Galmudug Administration		1	14	Eastern Africa	Somalia	Mudug	Gaalkacyo		Gaalkacyo	6.7697	47.4308	1	Local Source	Local	Clash between Darood/Laylakase militia and Galmudug Police was reported from Galkacyo. One person was reported dead and another one injured. The clash occurred following a burial of one person that died in the violence in North Galkacyo earlier that day. The burial took place in a vicinity of a South Galkacyo checkpoint to which the Galmudug Police Officers responded by shooting. Following the cl…	0	1561469335	SOM
5322378	706	SOM7216	7216	2011-04-17	2011	1	Battles	Armed clash	Darood-Leelkayse Sub-Clan Militia (Somalia)		4	14	Eastern Africa	Somalia	Mudug	Gaalkacyo		Gaalkacyo	6.7697	47.4308	1	Local Source	Local	Clash between Darood/Laylakase militia and Galmudug Police was reported from Galkacyo. One person was reported dead and another one injured. The clash occurred following a burial of one person that died in the violence in North Galkacyo earlier that day. The burial took place in a vicinity of a South Galkacyo checkpoint to which the Galmudug Police Officers responded by shooting. Following the cl…	0	1561469335	SOM
5322373	706	SOM7211	7211	2011-04-17	2011	1	Protests	Peaceful protest	Protesters (Somalia)	Women (Somalia)	6	60	Eastern Africa	Somalia	Lower Shabelle	Afgooye		Madiina	2.2204	45.2259	1	Local Source	Local	Youth and women held a peaceful demonstration by the front gate of Aden Adde International Airport. The demonstration protested against the recent Consultative Meeting organized by UNPOS in Nairobi and the Speakers attendance of it.	0	1561469335	SOM
5322379	706	SOM7217	7217	2011-04-17	2011	2	Violence against civilians	Abduction/forced disappearance	Unidentified Armed Group (Somalia)		3	37	Eastern Africa	Somalia	Woqooyi Galbeed	Hargeysa		Koodbuur	9.25	44.08	1	Local Source	Local	A female residing in Hargeisa left her house 17th April 2011 and travelled to Gabiley. When she did not return home within the agreed timeframe her family alarmed the police. The woman later informed her familys neighbour that she was kidnapped by unknown men dressed in civilian clothes. No further information about the case is currently available.	0	1561469335	SOM
5322379	706	SOM7217	7217	2011-04-17	2011	2	Violence against civilians	Abduction/forced disappearance	Civilians (Somalia)	Women (Somalia)	7	37	Eastern Africa	Somalia	Woqooyi Galbeed	Hargeysa		Koodbuur	9.25	44.08	1	Local Source	Local	A female residing in Hargeisa left her house 17th April 2011 and travelled to Gabiley. When she did not return home within the agreed timeframe her family alarmed the police. The woman later informed her familys neighbour that she was kidnapped by unknown men dressed in civilian clothes. No further information about the case is currently available.	0	1561469335	SOM
5322383	706	SOM7221	7221	2011-04-18	2011	1	Battles	Armed clash	Al Shabaab		2	12	Eastern Africa	Somalia	Banadir	Banadir		Hodan	2.0333	45.35	1	Local Source	Local	AS launched an attack against TFG/AMISOM positions at Milk Factory in Hodan district. Number of casualties is currently unknown.	0	1561469335	SOM
5322384	706	SOM7222	7222	2011-04-18	2011	1	Battles	Armed clash	Al Shabaab		2	12	Eastern Africa	Somalia	Banadir	Banadir		Hodan	2.0333	45.35	1	Local Source	Local	TFG/AMISOM attacked AS positions between Dabka and Bakaraha. The attack is believed to be linked to an attempt of TFG/AMISOM to reopen the road between Dabka and Bakaraha that is to be used for movement between the TFG controlled areas and the Bakara Market. 5 civilians were reported killed and 10 others injured. No significant territorial gains are believed to have been achieved by either side.	0	1561469335	SOM
5322382	706	SOM7220	7220	2011-04-18	2011	1	Battles	Armed clash	Al Shabaab		2	12	Eastern Africa	Somalia	Banadir	Banadir		Hawl Wadaag	2.048	45.32	1	Local Source	Local	TFG/AMISOM attacked AS positions between Dabka and Bakaraha. The attack is believed to be linked to an attempt of TFG/AMISOM to reopen the road between Dabka and Bakaraha that is to be used for movement between the TFG controlled areas and the Bakara Market. 5 civilians were reported killed and 10 others injured. No significant territorial gains are believed to have been achieved by either side.	5	1561469335	SOM
5322385	706	SOM7223	7223	2011-04-18	2011	1	Explosions/Remote violence	Remote explosive/landmine/IED	Unidentified Armed Group (Somalia)		3	37	Eastern Africa	Somalia	Togdheer	Buuhoodle		Buuhoodle	8.2516	46.3157	1	Local Source	Local	A child died in an explosion of an unspecified UXO. The explosion is believed to have occurred while the child was playing with the object. The UXO is believed to have been left in the area after the recent clashes of SSC and SL Forces.	0	1561469335	SOM
5322385	706	SOM7223	7223	2011-04-18	2011	1	Explosions/Remote violence	Remote explosive/landmine/IED	Civilians (Somalia)		7	37	Eastern Africa	Somalia	Togdheer	Buuhoodle		Buuhoodle	8.2516	46.3157	1	Local Source	Local	A child died in an explosion of an unspecified UXO. The explosion is believed to have occurred while the child was playing with the object. The UXO is believed to have been left in the area after the recent clashes of SSC and SL Forces.	0	1561469335	SOM
5322383	706	SOM7221	7221	2011-04-18	2011	1	Battles	Armed clash	Military Forces of Somalia (2004-2012)	AMISOM: African Union Mission in Somalia (2007-)	1	12	Eastern Africa	Somalia	Banadir	Banadir		Hodan	2.0333	45.35	1	Local Source	Local	AS launched an attack against TFG/AMISOM positions at Milk Factory in Hodan district. Number of casualties is currently unknown.	0	1561469335	SOM
5322384	706	SOM7222	7222	2011-04-18	2011	1	Battles	Armed clash	Military Forces of Somalia (2004-2012)	AMISOM: African Union Mission in Somalia (2007-)	1	12	Eastern Africa	Somalia	Banadir	Banadir		Hodan	2.0333	45.35	1	Local Source	Local	TFG/AMISOM attacked AS positions between Dabka and Bakaraha. The attack is believed to be linked to an attempt of TFG/AMISOM to reopen the road between Dabka and Bakaraha that is to be used for movement between the TFG controlled areas and the Bakara Market. 5 civilians were reported killed and 10 others injured. No significant territorial gains are believed to have been achieved by either side.	0	1561469335	SOM
5322382	706	SOM7220	7220	2011-04-18	2011	1	Battles	Armed clash	Military Forces of Somalia (2004-2012)	AMISOM: African Union Mission in Somalia (2007-)	1	12	Eastern Africa	Somalia	Banadir	Banadir		Hawl Wadaag	2.048	45.32	1	Local Source	Local	TFG/AMISOM attacked AS positions between Dabka and Bakaraha. The attack is believed to be linked to an attempt of TFG/AMISOM to reopen the road between Dabka and Bakaraha that is to be used for movement between the TFG controlled areas and the Bakara Market. 5 civilians were reported killed and 10 others injured. No significant territorial gains are believed to have been achieved by either side.	5	1561469335	SOM
5322381	706	SOM7219	7219	2011-04-18	2011	1	Strategic developments	Change to group/activity	Military Forces of Somalia (2004-2012) Puntland Security Force		1	10	Eastern Africa	Somalia	Mudug	Gaalkacyo		Gaalkacyo	6.7697	47.4308	1	Local Source	Local	Movement of forces: Between the 18-20th April 2011, considerable Puntland security forces and at least 2 high level delegations arrived in Galkayo, as a response to the recent events of the 16th-17th April. Puntland Police Commissioner, two of his deputies, CID inspectors, and seventy additional policemen followed by a Puntland delegation composed of army commanders and ministers were reported in…	0	1561469335	SOM
5322380	706	SOM7218	7218	2011-04-18	2011	1	Strategic developments	Change to group/activity	Military Forces of Somalia (2004-2012) Puntland Security Force		1	10	Eastern Africa	Somalia	Mudug	Gaalkacyo		Gaalkacyo	6.7697	47.4308	1	Local Source	Local	Movement of forces: Around 200 members of the PL Security Forces arrived to Galkacyo from Garowe on Monday afternoon. The forces are believed to have been transferred to Galkacyo in connection to an upcoming security operation in the city.	0	1561469335	SOM
5322387	706	SOM7225	7225	2011-04-19	2011	1	Strategic developments	Change to group/activity	Militia (Anti-Al Shabaab)		3	30	Eastern Africa	Somalia	Gedo	Doolow		Bula Hawa	3.9276	41.8742	1	Local Source	Local	Movement of forces: About 800 fighters belonging to the Doolow anti-AS alliance left Bula Xawo for Garbaharey. On 19th April in the morning the forces were reported to have arrived to Xara Hadud. The reported aim of the movement is to push the remaining AS element out of Garbaharey and to join with the other forces in the area (primarily Luuq) and advance towards Baardheere.	0	1561469335	SOM
5322386	706	SOM7224	7224	2011-04-19	2011	1	Strategic developments	Change to group/activity	Military Forces of Somalia (2004-2012) Puntland Security Force		1	10	Eastern Africa	Somalia	Mudug	Gaalkacyo		Gaalkacyo	6.7697	47.4308	1	Local Source	Local	Movement of forces: Between the 18-20th April 2011, considerable Puntland security forces and at least 2 high level delegations arrived in Galkayo, as a response to the recent events of the 16th-17th April. Puntland Police Commissioner, two of his deputies, CID inspectors, and seventy additional policemen followed by a Puntland delegation composed of army commanders and ministers were reported in…	0	1561469335	SOM
5322391	706	SOM7229	7229	2011-04-20	2011	1	Explosions/Remote violence	Shelling/artillery/missile attack	Al Shabaab		2	23	Eastern Africa	Somalia	Gedo	Luuq		Luuq	3.8	42.5446	1	Local Source	Local	In Luuq a case of a sporadic shelling by AS was reported form Kureedka outskirts. Tensions in the areas remain high since the last attempt of AS to recapture the town.	0	1561469335	SOM
5322390	706	SOM7228	7228	2011-04-20	2011	1	Battles	Armed clash	Al Shabaab		2	23	Eastern Africa	Somalia	Lower Juba	Afmadow		Dhobley	0.4063	41.0124	1	Local Source	Local	In Dhoobley area a new round of fighting was also reported. On the 20th April anti-AS troops attacked AS positions in Jirma area (between Dif and Afmadow). Anti-AS forces claim victory over AS and captured the Commander of AS Lower Jubba force Mohamud Takhal who was reported to have been injured during the battle. Takhal alongside a number of his men were arrested and transported to Garissa (Keny…	1	1561469335	SOM
5322389	706	SOM7227	7227	2011-04-20	2011	1	Battles	Government regains territory	Al Shabaab		2	23	Eastern Africa	Somalia	Gedo	Ceel Waaq		Busaar	2.6778	41.3254	1	Local Source	Local	On 20th and 21st April clashes erupted in Buusaar (40 Km south-east of Ceel Waq) Gedo region. Clashes in the village that was considered to be in the AS area of influence reportedly fell under control of anti-AS forces on 21st April.	0	1561469335	SOM
5322391	706	SOM7229	7229	2011-04-20	2011	1	Explosions/Remote violence	Shelling/artillery/missile attack	ASWJ: Ahlu Sunna Wal Jamaa		3	23	Eastern Africa	Somalia	Gedo	Luuq		Luuq	3.8	42.5446	1	Local Source	Local	In Luuq a case of a sporadic shelling by AS was reported form Kureedka outskirts. Tensions in the areas remain high since the last attempt of AS to recapture the town.	0	1561469335	SOM
5322390	706	SOM7228	7228	2011-04-20	2011	1	Battles	Armed clash	Unidentified Armed Group (Somalia)		3	23	Eastern Africa	Somalia	Lower Juba	Afmadow		Dhobley	0.4063	41.0124	1	Local Source	Local	In Dhoobley area a new round of fighting was also reported. On the 20th April anti-AS troops attacked AS positions in Jirma area (between Dif and Afmadow). Anti-AS forces claim victory over AS and captured the Commander of AS Lower Jubba force Mohamud Takhal who was reported to have been injured during the battle. Takhal alongside a number of his men were arrested and transported to Garissa (Keny…	1	1561469335	SOM
5322389	706	SOM7227	7227	2011-04-20	2011	1	Battles	Government regains territory	Unidentified Armed Group (Somalia)		3	23	Eastern Africa	Somalia	Gedo	Ceel Waaq		Busaar	2.6778	41.3254	1	Local Source	Local	On 20th and 21st April clashes erupted in Buusaar (40 Km south-east of Ceel Waq) Gedo region. Clashes in the village that was considered to be in the AS area of influence reportedly fell under control of anti-AS forces on 21st April.	0	1561469335	SOM
5322388	706	SOM7226	7226	2011-04-20	2011	1	Strategic developments	Change to group/activity	Military Forces of Somalia (2004-2012) Puntland Security Force		1	10	Eastern Africa	Somalia	Mudug	Gaalkacyo		Gaalkacyo	6.7697	47.4308	1	Local Source	Local	Movement of forces: Between the 18-20th April 2011, considerable Puntland security forces and at least 2 high level delegations arrived in Galkayo, as a response to the recent events of the 16th-17th April. Puntland Police Commissioner, two of his deputies, CID inspectors, and seventy additional policemen followed by a Puntland delegation composed of army commanders and ministers were reported in…	0	1561469335	SOM
5322392	706	SOM7230	7230	2011-04-21	2011	1	Battles	Government regains territory	Al Shabaab		2	23	Eastern Africa	Somalia	Gedo	Ceel Waaq		Busaar	2.6778	41.3254	1	Local Source	Local	On 20th and 21st April clashes erupted in Buusaar (40 Km south-east of Ceel Waq) Gedo region. Clashes in the village that was considered to be in the AS area of influence reportedly fell under control of anti-AS forces on 21st April.	0	1561469335	SOM
5322394	706	SOM7232	7232	2011-04-21	2011	1	Explosions/Remote violence	Grenade	Unidentified Armed Group (Somalia)		3	37	Eastern Africa	Somalia	Lower Shabelle	Afgooye		Madiina	2.2204	45.2259	1	Local Source	Local	2 perpetrators hurled a hand grenade to a residence of an officer of TFG Security Forces. No deaths or injuries are believed to have occurred in the attack. The perpetrators escaped the scene.	0	1561469335	SOM
5322394	706	SOM7232	7232	2011-04-21	2011	1	Explosions/Remote violence	Grenade	Civilians (Somalia)	Military Forces of Somalia (2004-2012)	7	37	Eastern Africa	Somalia	Lower Shabelle	Afgooye		Madiina	2.2204	45.2259	1	Local Source	Local	2 perpetrators hurled a hand grenade to a residence of an officer of TFG Security Forces. No deaths or injuries are believed to have occurred in the attack. The perpetrators escaped the scene.	0	1561469335	SOM
5322393	706	SOM7231	7231	2011-04-21	2011	1	Battles	Armed clash	Unidentified Armed Group (Somalia)		3	33	Eastern Africa	Somalia	Gedo	Ceel Waaq		Muudale	2.5411	41.5037	2	Local Source	Local	According to unconfirmed reports, another round of clashes, related to those in Buusaar occurred in Muudaale about 25 Km further towards Baardheere on 21st April.	0	1561469335	SOM
5322393	706	SOM7231	7231	2011-04-21	2011	1	Battles	Armed clash	Unidentified Armed Group (Somalia)		3	33	Eastern Africa	Somalia	Gedo	Ceel Waaq		Muudale	2.5411	41.5037	2	Local Source	Local	According to unconfirmed reports, another round of clashes, related to those in Buusaar occurred in Muudaale about 25 Km further towards Baardheere on 21st April.	0	1561469335	SOM
5322392	706	SOM7230	7230	2011-04-21	2011	1	Battles	Government regains territory	Unidentified Armed Group (Somalia)		3	23	Eastern Africa	Somalia	Gedo	Ceel Waaq		Busaar	2.6778	41.3254	1	Local Source	Local	On 20th and 21st April clashes erupted in Buusaar (40 Km south-east of Ceel Waq) Gedo region. Clashes in the village that was considered to be in the AS area of influence reportedly fell under control of anti-AS forces on 21st April.	0	1561469335	SOM
5322398	706	SOM7236	7236	2011-04-22	2011	1	Battles	Armed clash	Al Shabaab		2	28	Eastern Africa	Somalia	Banadir	Banadir		Hawl Wadaag	2.048	45.32	1	Local Source	Local	Sporadic armed clashes between TFG/AMISOM forces and AS fighters were reported from Shanta Geed after AS launched an attack against TFG/AMISOM positions. Casualties could not be established.	0	1561469335	SOM
5322395	706	SOM7233	7233	2011-04-22	2011	1	Battles	Armed clash	Al Shabaab		2	23	Eastern Africa	Somalia	Gedo	Baardheere		Jungal	2.3333	42.2833	2	Local Source	Local	Fighting between anti-AS forces and AS took place in Balanbaashe. The fighting started after AS launched an attack against anti-AS forces with an intension to retaken Buusaar. Unconfirmed reports suggest the 11 people were killed. Anti-AS forces were reported to have retained control of Balanbaashe.	11	1561469335	SOM
5322398	706	SOM7236	7236	2011-04-22	2011	1	Battles	Armed clash	AMISOM: African Union Mission in Somalia (2007-)		8	28	Eastern Africa	Somalia	Banadir	Banadir		Hawl Wadaag	2.048	45.32	1	Local Source	Local	Sporadic armed clashes between TFG/AMISOM forces and AS fighters were reported from Shanta Geed after AS launched an attack against TFG/AMISOM positions. Casualties could not be established.	0	1561469335	SOM
5322395	706	SOM7233	7233	2011-04-22	2011	1	Battles	Armed clash	Militia (Anti-Al Shabaab)		3	23	Eastern Africa	Somalia	Gedo	Baardheere		Jungal	2.3333	42.2833	2	Local Source	Local	Fighting between anti-AS forces and AS took place in Balanbaashe. The fighting started after AS launched an attack against anti-AS forces with an intension to retaken Buusaar. Unconfirmed reports suggest the 11 people were killed. Anti-AS forces were reported to have retained control of Balanbaashe.	11	1561469335	SOM
5322397	706	SOM7235	7235	2011-04-22	2011	1	Violence against civilians	Attack	Darood-Majeerteen Sub-Clan Militia (Somalia)		4	47	Eastern Africa	Somalia	Sanaag	Laasqoray		Dhahar	9.7492	48.8219	1	Local Source	Local	Three men belonging to Darood/Warsangeli/Dubays sub-clan were killed by gunmen belonging to Darood/Majerteen/Osman Mohamud in an ambush of their truck on a road between Dhahar and Sharbi village. The killing is believed to be a case of revenge killing for 4th April 2011 when Warsangeli gunmen killed one men and injured two others all belonging to the Majerteen clan. The perpetrators are also beli…	3	1561469335	SOM
5322397	706	SOM7235	7235	2011-04-22	2011	1	Violence against civilians	Attack	Civilians (Somalia)	Darood-Warsangeli Sub-Clan Group (Somalia)	7	47	Eastern Africa	Somalia	Sanaag	Laasqoray		Dhahar	9.7492	48.8219	1	Local Source	Local	Three men belonging to Darood/Warsangeli/Dubays sub-clan were killed by gunmen belonging to Darood/Majerteen/Osman Mohamud in an ambush of their truck on a road between Dhahar and Sharbi village. The killing is believed to be a case of revenge killing for 4th April 2011 when Warsangeli gunmen killed one men and injured two others all belonging to the Majerteen clan. The perpetrators are also beli…	3	1561469335	SOM
5322396	706	SOM7234	7234	2011-04-22	2011	1	Violence against civilians	Attack	Unidentified Armed Group (Somalia)		3	37	Eastern Africa	Somalia	Mudug	Gaalkacyo		Gaalkacyo	6.7697	47.4308	1	Local Source	Local	A former governor of Galadi town (Ethiopia) Sheikh Muktar Ali Jama who currently served at the Ethiopian consulate in Garowe was assassinated in North Galkacyo. The perpetrators escaped the crime scene. 45 minutes after the attack PL police arrested two suspected teenagers. One of the suspects was armed with a pistol. Both of the suspects were detained for further investigation. Although unconfir…	1	1561469335	SOM
5322396	706	SOM7234	7234	2011-04-22	2011	1	Violence against civilians	Attack	Civilians (Somalia)		7	37	Eastern Africa	Somalia	Mudug	Gaalkacyo		Gaalkacyo	6.7697	47.4308	1	Local Source	Local	A former governor of Galadi town (Ethiopia) Sheikh Muktar Ali Jama who currently served at the Ethiopian consulate in Garowe was assassinated in North Galkacyo. The perpetrators escaped the crime scene. 45 minutes after the attack PL police arrested two suspected teenagers. One of the suspects was armed with a pistol. Both of the suspects were detained for further investigation. Although unconfir…	1	1561469335	SOM
5322406	706	SOM7244	7244	2011-04-23	2011	1	Violence against civilians	Attack	Al Shabaab		2	27	Eastern Africa	Somalia	Banadir	Banadir		Wardhigley	2.0549	45.33	1	Local Source	Local	AS gunmen shot dead two young men for unknown reason.	2	1561469335	SOM
5322403	706	SOM7241	7241	2011-04-23	2011	1	Battles	Non-state actor overtakes territory	Al Shabaab		2	23	Eastern Africa	Somalia	Galgaduud	Dhuusamarreeb		Dhuusamarreeb	5.5376	46.3867	1	Local Source	Local	AS took control over Dhusamareb after a short (about 20 minutes) armed clash with ASWJ fighters. The AS attack came after some ASWJ units transferred to Guri Ceel. 8 ASWJ militiamen were reported killed in the fight and 5 others including a senior ASWJ officer Abdihakin Farah of Dadood/Marehan clan were captured. AS also reportedly seized 3 technicals. During a brief takeover of the town AS repor…	0	1561469335	SOM
5322404	706	SOM7242	7242	2011-04-23	2011	1	Battles	Armed clash	Al Shabaab		2	23	Eastern Africa	Somalia	Gedo	Luuq		Luuq	3.8	42.5446	1	Local Source	Local	AS forces attacked anti-AS forces in Kureedka outskirts of Luuq. Eight people were reported dead in the fighting. Anti-AS forces were reported to have retained control of its positions in Kureedka.	8	1561469335	SOM
5322401	706	SOM7239	7239	2011-04-23	2011	1	Battles	Armed clash	Al Shabaab		2	12	Eastern Africa	Somalia	Banadir	Banadir		Abdul-Aziz	2.0405	45.36	1	Local Source	Local	AS attacked TFG/AMISOM positions at above mentioned areas. No civilian casualties were reported.	0	1561469335	SOM
5322402	706	SOM7240	7240	2011-04-23	2011	1	Battles	Armed clash	Al Shabaab		2	12	Eastern Africa	Somalia	Banadir	Banadir		Bondhere	2.0456	45.34	1	Local Source	Local	AS attacked TFG/AMISOM positions at above mentioned areas. No civilian casualties were reported.	0	1561469335	SOM
5322400	706	SOM7238	7238	2011-04-23	2011	1	Strategic developments	Change to group/activity	Militia (Anti-Al Shabaab)		3	30	Eastern Africa	Somalia	Gedo	Doolow		Bula Hawa	3.9276	41.8742	1	Local Source	Local	Movement of forces: Training camp of anti-AS forces was moved from Bula Xawo to Doolow, Ethiopia. The move was prompted by a departure of most anti-AS forces to the frontlines and form it resulting vulnerability of the training facility. The training camp is Doolow Ethiopia was used for training of Somali militia until the anti-AS forces captured Bula Xawo.	0	1561469335	SOM
5322406	706	SOM7244	7244	2011-04-23	2011	1	Violence against civilians	Attack	Civilians (Somalia)		7	27	Eastern Africa	Somalia	Banadir	Banadir		Wardhigley	2.0549	45.33	1	Local Source	Local	AS gunmen shot dead two young men for unknown reason.	2	1561469335	SOM
5322407	706	SOM7245	7245	2011-04-23	2011	1	Explosions/Remote violence	Grenade	Unidentified Armed Group (Somalia)		3	37	Eastern Africa	Somalia	Banadir	Banadir		Dharkenley	2.0095	45.25	1	Local Source	Local	Two boys (5-7 years old) were killed by an explosion of a hand grenade. The explosion is believed to have been triggered by the boys while they were playing with the device.	2	1561469335	SOM
5322407	706	SOM7245	7245	2011-04-23	2011	1	Explosions/Remote violence	Grenade	Civilians (Somalia)		7	37	Eastern Africa	Somalia	Banadir	Banadir		Dharkenley	2.0095	45.25	1	Local Source	Local	Two boys (5-7 years old) were killed by an explosion of a hand grenade. The explosion is believed to have been triggered by the boys while they were playing with the device.	2	1561469335	SOM
5322399	706	SOM7237	7237	2011-04-23	2011	1	Strategic developments	Change to group/activity	ASWJ: Ahlu Sunna Wal Jamaa		3	30	Eastern Africa	Somalia	Galgaduud	Dhuusamarreeb		Dhuusamarreeb	5.5376	46.3867	1	Local Source	Local	Movement of forces: ASWJ was reported to be sending reinforcements from Balanbale and Haradle to Dhusamareb.	0	1561469335	SOM
5322403	706	SOM7241	7241	2011-04-23	2011	1	Battles	Non-state actor overtakes territory	ASWJ: Ahlu Sunna Wal Jamaa		3	23	Eastern Africa	Somalia	Galgaduud	Dhuusamarreeb		Dhuusamarreeb	5.5376	46.3867	1	Local Source	Local	AS took control over Dhusamareb after a short (about 20 minutes) armed clash with ASWJ fighters. The AS attack came after some ASWJ units transferred to Guri Ceel. 8 ASWJ militiamen were reported killed in the fight and 5 others including a senior ASWJ officer Abdihakin Farah of Dadood/Marehan clan were captured. AS also reportedly seized 3 technicals. During a brief takeover of the town AS repor…	0	1561469335	SOM
5322405	706	SOM7243	7243	2011-04-23	2011	1	Battles	Armed clash	Hawiye-Habar Gedir-Saleban Sub-Clan Militia (Somalia)		4	44	Eastern Africa	Somalia	Mudug	Xarardheere		Xarardheere	4.6517	47.8584	1	Local Source	Local	Renewed inter-clan clashes were reported between Hawiye/Habr Gedir/Saleban and Quabays sub-clan of Dir. Five civilians were reported killed and nine others injured.	5	1561469335	SOM
5322405	706	SOM7243	7243	2011-04-23	2011	1	Battles	Armed clash	Dir-Qubeys Sub-Clan Militia (Somalia)		4	44	Eastern Africa	Somalia	Mudug	Xarardheere		Xarardheere	4.6517	47.8584	1	Local Source	Local	Renewed inter-clan clashes were reported between Hawiye/Habr Gedir/Saleban and Quabays sub-clan of Dir. Five civilians were reported killed and nine others injured.	5	1561469335	SOM
5322404	706	SOM7242	7242	2011-04-23	2011	1	Battles	Armed clash	Militia (Anti-Al Shabaab)		3	23	Eastern Africa	Somalia	Gedo	Luuq		Luuq	3.8	42.5446	1	Local Source	Local	AS forces attacked anti-AS forces in Kureedka outskirts of Luuq. Eight people were reported dead in the fighting. Anti-AS forces were reported to have retained control of its positions in Kureedka.	8	1561469335	SOM
5322401	706	SOM7239	7239	2011-04-23	2011	1	Battles	Armed clash	Military Forces of Somalia (2004-2012)	AMISOM: African Union Mission in Somalia (2007-)	1	12	Eastern Africa	Somalia	Banadir	Banadir		Abdul-Aziz	2.0405	45.36	1	Local Source	Local	AS attacked TFG/AMISOM positions at above mentioned areas. No civilian casualties were reported.	0	1561469335	SOM
5322402	706	SOM7240	7240	2011-04-23	2011	1	Battles	Armed clash	Military Forces of Somalia (2004-2012)	AMISOM: African Union Mission in Somalia (2007-)	1	12	Eastern Africa	Somalia	Banadir	Banadir		Bondhere	2.0456	45.34	1	Local Source	Local	AS attacked TFG/AMISOM positions at above mentioned areas. No civilian casualties were reported.	0	1561469335	SOM
5322409	706	SOM7247	7247	2011-04-24	2011	1	Violence against civilians	Attack	Unidentified Armed Group (Somalia)		3	37	Eastern Africa	Somalia	Bari	Bossaso		Bosaso	11.2842	49.1816	1	Local Source	Local	A prominent elders of Darood/Majerteen/Ali Saleban Said Mohammed Said aka Kashawito was assassinated a few minutes before Cisha Prayers. At least two other elders and a number of family members of the victim were injured by stray bullets. The assassination is believed to be motivated by close ties of the elder and the PL Government.	0	1561469335	SOM
5322409	706	SOM7247	7247	2011-04-24	2011	1	Violence against civilians	Attack	Civilians (Somalia)		7	37	Eastern Africa	Somalia	Bari	Bossaso		Bosaso	11.2842	49.1816	1	Local Source	Local	A prominent elders of Darood/Majerteen/Ali Saleban Said Mohammed Said aka Kashawito was assassinated a few minutes before Cisha Prayers. At least two other elders and a number of family members of the victim were injured by stray bullets. The assassination is believed to be motivated by close ties of the elder and the PL Government.	0	1561469335	SOM
5322408	706	SOM7246	7246	2011-04-24	2011	1	Riots	Violent demonstration	Rioters (Somalia)		5	50	Eastern Africa	Somalia	Sool	Laas Caanood		Laascaanood	8.4774	47.3597	1	Local Source	Local	Local residents in Semi Centre who were evicted by local authorities from the government land for a purpose of construction of a new university reportedly turned violent and destroyed the foundation and walls of the university building. The residents demanded the support of the existing Nugal University as opposed to the construction of a new one. The situation became calm later in the day.	0	1561469335	SOM
5322410	706	SOM7248	7248	2011-04-25	2011	1	Strategic developments	Change to group/activity	Al Shabaab		2	20	Eastern Africa	Somalia	Galgaduud	Dhuusamarreeb		Dhuusamarreeb	5.5376	46.3867	2	Local Source	Local	Movement of forces: Al Shabaab troops stationed at God-durwa (45 km east of Dhushamareeb) sent a number of troops (2 technical and around 50 troops) to Hoteye (Beerta Xooteye) and Ceel Garas (7 km east of Dhusamareb). All shops in Dhusamareb were reported to have been closed and movement around the town restricted. ASWJ was also reported to be sending reinforcements from Balanbale and Haradle to …	0	1561469335	SOM
5322413	706	SOM7251	7251	2011-04-25	2011	1	Battles	Armed clash	Al Shabaab		2	12	Eastern Africa	Somalia	Banadir	Banadir		Hawl Wadaag	2.048	45.32	1	Local Source	Local	Armed clashes and exchange of mortar shelling between TFG/AMISOM and AS fighters was reported from Buur Hindi. The clashes started after AS fighters launched an attack against TFG/AMISOM position at Buur Hindi. The fighting lasted for about thirty minutes. Casualties could not be established.	0	1561469335	SOM
5322412	706	SOM7250	7250	2011-04-25	2011	1	Battles	Armed clash	Al Shabaab		2	12	Eastern Africa	Somalia	Banadir	Banadir		Bondhere	2.0456	45.34	1	Local Source	Local	Armed clashes and exchange of mortar shelling between TFG/AMISOM and AS fighters were reported from the former Ministry of Interior. The clashes begun after AS fighters attacked TFG/AMISOM positions in the area. The fighting lasted for about one hour and thirty minutes. Casualties could not be established.	0	1561469335	SOM
5322413	706	SOM7251	7251	2011-04-25	2011	1	Battles	Armed clash	Military Forces of Somalia (2004-2012)	AMISOM: African Union Mission in Somalia (2007-)	1	12	Eastern Africa	Somalia	Banadir	Banadir		Hawl Wadaag	2.048	45.32	1	Local Source	Local	Armed clashes and exchange of mortar shelling between TFG/AMISOM and AS fighters was reported from Buur Hindi. The clashes started after AS fighters launched an attack against TFG/AMISOM position at Buur Hindi. The fighting lasted for about thirty minutes. Casualties could not be established.	0	1561469335	SOM
5322412	706	SOM7250	7250	2011-04-25	2011	1	Battles	Armed clash	Military Forces of Somalia (2004-2012)	AMISOM: African Union Mission in Somalia (2007-)	1	12	Eastern Africa	Somalia	Banadir	Banadir		Bondhere	2.0456	45.34	1	Local Source	Local	Armed clashes and exchange of mortar shelling between TFG/AMISOM and AS fighters were reported from the former Ministry of Interior. The clashes begun after AS fighters attacked TFG/AMISOM positions in the area. The fighting lasted for about one hour and thirty minutes. Casualties could not be established.	0	1561469335	SOM
5322411	706	SOM7249	7249	2011-04-25	2011	1	Battles	Armed clash	Military Forces of Somalia (2004-2012)		1	11	Eastern Africa	Somalia	Banadir	Banadir		Hodan	2.0333	45.35	1	Local Source	Local	Two groups of TFG Security Forces exchanged fire at the above mentioned area reportedly following an argument over distribution of illegally collected money from mini-buses at KM4. 3 people (2 officers of the TFG Security Forces) were reported killed and 4 others injured.	3	1561469335	SOM
5322411	706	SOM7249	7249	2011-04-25	2011	1	Battles	Armed clash	Military Forces of Somalia (2004-2012)		1	11	Eastern Africa	Somalia	Banadir	Banadir		Hodan	2.0333	45.35	1	Local Source	Local	Two groups of TFG Security Forces exchanged fire at the above mentioned area reportedly following an argument over distribution of illegally collected money from mini-buses at KM4. 3 people (2 officers of the TFG Security Forces) were reported killed and 4 others injured.	3	1561469335	SOM
5322416	706	SOM7254	7254	2011-04-26	2011	1	Battles	Armed clash	Al Shabaab		2	12	Eastern Africa	Somalia	Banadir	Banadir		Hodan	2.0333	45.35	1	Local Source	Local	TFG/AMISOM troops clashed with AS fighters in Siigaale after AS attacked TFG/AMISOM positions. Information about casualties is currently unavailable	0	1561469335	SOM
5322415	706	SOM7253	7253	2011-04-26	2011	1	Battles	Armed clash	Al Shabaab		2	12	Eastern Africa	Somalia	Banadir	Banadir		Hawl Wadaag	2.048	45.32	1	Local Source	Local	Fighting between TFG/AMISOM forces and AS fighters was reported from Buur Hindi. The fighting started after AS fighters launched an attack against TFG/AMISOM positions. Information about casualties is currently unavailable.	0	1561469335	SOM
5322417	706	SOM7255	7255	2011-04-26	2011	1	Explosions/Remote violence	Remote explosive/landmine/IED	Unidentified Armed Group (Somalia)		3	37	Eastern Africa	Somalia	Gedo	Luuq		Luuq	3.8	42.5446	1	Local Source	Local	A land mine exploded under a minibus carrying passengers between Ceel Barde and Luuq. Up to 10 people were reported to have died in the incident.	10	1561469335	SOM
5322417	706	SOM7255	7255	2011-04-26	2011	1	Explosions/Remote violence	Remote explosive/landmine/IED	Civilians (Somalia)		7	37	Eastern Africa	Somalia	Gedo	Luuq		Luuq	3.8	42.5446	1	Local Source	Local	A land mine exploded under a minibus carrying passengers between Ceel Barde and Luuq. Up to 10 people were reported to have died in the incident.	10	1561469335	SOM
5322416	706	SOM7254	7254	2011-04-26	2011	1	Battles	Armed clash	Military Forces of Somalia (2004-2012)	AMISOM: African Union Mission in Somalia (2007-)	1	12	Eastern Africa	Somalia	Banadir	Banadir		Hodan	2.0333	45.35	1	Local Source	Local	TFG/AMISOM troops clashed with AS fighters in Siigaale after AS attacked TFG/AMISOM positions. Information about casualties is currently unavailable	0	1561469335	SOM
5322415	706	SOM7253	7253	2011-04-26	2011	1	Battles	Armed clash	Military Forces of Somalia (2004-2012)	AMISOM: African Union Mission in Somalia (2007-)	1	12	Eastern Africa	Somalia	Banadir	Banadir		Hawl Wadaag	2.048	45.32	1	Local Source	Local	Fighting between TFG/AMISOM forces and AS fighters was reported from Buur Hindi. The fighting started after AS fighters launched an attack against TFG/AMISOM positions. Information about casualties is currently unavailable.	0	1561469335	SOM
5322414	706	SOM7252	7252	2011-04-26	2011	1	Strategic developments	Change to group/activity	Militia (Anti-Al Shabaab)		3	30	Eastern Africa	Somalia	Gedo	Luuq		Luuq	3.8	42.5446	1	Local Source	Local	Movement of forces: Anti-AS forces reportedly left Luuq by foot in direction of Berdaale on 26th April 2011 in evening hours.	0	1561469335	SOM
5322418	706	SOM7256	7256	2011-04-27	2011	1	Battles	Armed clash	Al Shabaab		2	23	Eastern Africa	Somalia	Gedo	Garbahaarey		Tuulo Barwaaqo	3.5019	42.1547	1	Local Source	Local	Fighting between anti-AS forces and AS took place in Tuulo Barwaqo. Anti-AS forces were reported victorious and having forced AS militias to retreat.	0	1561469335	SOM
5322420	706	SOM7258	7258	2011-04-27	2011	1	Violence against civilians	Attack	Harti-Leelkayse Sub-Clan Militia (Somalia)		4	47	Eastern Africa	Somalia	Mudug	Gaalkacyo		Gaalkacyo	6.7697	47.4308	1	Local Source	Local	A member of the Reer Mahad (Omar Mohamud/Majerteen) and a member of the Saad clan were killed in Garsoor neighborhood by armed men believed to be from the Leelkase sub-clan of Harti. The motive of the killing is believed to be linked to clan revenge. 2 other persons are said to have been injured.	2	1561469335	SOM
5322420	706	SOM7258	7258	2011-04-27	2011	1	Violence against civilians	Attack	Civilians (Somalia)	Reer-Mohamud Clan Group (Somalia); Saad Clan Group (Somalia)	7	47	Eastern Africa	Somalia	Mudug	Gaalkacyo		Gaalkacyo	6.7697	47.4308	1	Local Source	Local	A member of the Reer Mahad (Omar Mohamud/Majerteen) and a member of the Saad clan were killed in Garsoor neighborhood by armed men believed to be from the Leelkase sub-clan of Harti. The motive of the killing is believed to be linked to clan revenge. 2 other persons are said to have been injured.	2	1561469335	SOM
5322418	706	SOM7256	7256	2011-04-27	2011	1	Battles	Armed clash	Militia (Anti-Al Shabaab)		3	23	Eastern Africa	Somalia	Gedo	Garbahaarey		Tuulo Barwaaqo	3.5019	42.1547	1	Local Source	Local	Fighting between anti-AS forces and AS took place in Tuulo Barwaqo. Anti-AS forces were reported victorious and having forced AS militias to retreat.	0	1561469335	SOM
5322419	706	SOM7257	7257	2011-04-27	2011	1	Battles	Armed clash	Military Forces of Somalia (2004-2012) Puntland Police Force		1	14	Eastern Africa	Somalia	Mudug	Gaalkacyo		Gaalkacyo	6.7697	47.4308	1	Local Source	Local	Clashes between Laylakase militia and a PL Police unit were reported from North Galkacyo. The fighting occurred after the police went to collect a body of a Majerteen/Reer Mahad killed by Laylakase earlier in the day. 6 people (5 Majerteen/Reer Mahad and 1 Laylakase) were reported dead). Mediation effort between the clans was reported to have started on 27th April. The elders agreed on ceasefire …	0	1561469335	SOM
5322419	706	SOM7257	7257	2011-04-27	2011	1	Battles	Armed clash	Leelkayse Clan Militia (Somalia)		4	14	Eastern Africa	Somalia	Mudug	Gaalkacyo		Gaalkacyo	6.7697	47.4308	1	Local Source	Local	Clashes between Laylakase militia and a PL Police unit were reported from North Galkacyo. The fighting occurred after the police went to collect a body of a Majerteen/Reer Mahad killed by Laylakase earlier in the day. 6 people (5 Majerteen/Reer Mahad and 1 Laylakase) were reported dead). Mediation effort between the clans was reported to have started on 27th April. The elders agreed on ceasefire …	0	1561469335	SOM
5322424	706	SOM7262	7262	2011-04-28	2011	1	Battles	Armed clash	Al Shabaab		2	23	Eastern Africa	Somalia	Gedo	Luuq		Luuq	3.8	42.5446	1	Local Source	Local	Anti-AS forces reportedly killed 5 AS fighters patrolling the above mentioned area.	5	1561469335	SOM
5322425	706	SOM7263	7263	2011-04-28	2011	1	Battles	Armed clash	Al Shabaab		2	23	Eastern Africa	Somalia	Gedo	Luuq		Luuq	3.8	42.5446	1	Local Source	Local	AS militiamen ambushed a convoy of anti-AS forces in Bohol Bashiir killing 3 anti-AS fighters. Number of casualties is currently unknown.	3	1561469335	SOM
5322422	706	SOM7260	7260	2011-04-28	2011	1	Strategic developments	Non-violent transfer of territory	Militia (Anti-Al Shabaab)		3	30	Eastern Africa	Somalia	Gedo	Garbahaarey		Garbahaarey	3.328	42.2199	1	Local Source	Local	Anti-AS troops took control of Garbahaarey after a tactical withdrawal of AS forces.	0	1561469335	SOM
5322424	706	SOM7262	7262	2011-04-28	2011	1	Battles	Armed clash	Militia (Anti-Al Shabaab)		3	23	Eastern Africa	Somalia	Gedo	Luuq		Luuq	3.8	42.5446	1	Local Source	Local	Anti-AS forces reportedly killed 5 AS fighters patrolling the above mentioned area.	5	1561469335	SOM
5322425	706	SOM7263	7263	2011-04-28	2011	1	Battles	Armed clash	Militia (Anti-Al Shabaab)		3	23	Eastern Africa	Somalia	Gedo	Luuq		Luuq	3.8	42.5446	1	Local Source	Local	AS militiamen ambushed a convoy of anti-AS forces in Bohol Bashiir killing 3 anti-AS fighters. Number of casualties is currently unknown.	3	1561469335	SOM
5322426	706	SOM7264	7264	2011-04-28	2011	1	Battles	Armed clash	Military Forces of Somalia (2004-2012)		1	13	Eastern Africa	Somalia	Banadir	Banadir		K4	2.0316	45.3107	1	Local Source	Local	A group of TFG Police based at a fuel station near Nasa Hablood hotel (close to KM4) and militia loyal to Gen. Indha Adde reportedly exchanged fire at the above mentioned area. The shooting was reported to have started after an unspecified dispute over finance. One militiaman from Indha Addes force was shot dead. Shortly after the shooting reinforcements of Indha Addes men arrived to the area and…	0	1561469335	SOM
5322426	706	SOM7264	7264	2011-04-28	2011	1	Battles	Armed clash	Militia (Gen. Indha Adde)		3	13	Eastern Africa	Somalia	Banadir	Banadir		K4	2.0316	45.3107	1	Local Source	Local	A group of TFG Police based at a fuel station near Nasa Hablood hotel (close to KM4) and militia loyal to Gen. Indha Adde reportedly exchanged fire at the above mentioned area. The shooting was reported to have started after an unspecified dispute over finance. One militiaman from Indha Addes force was shot dead. Shortly after the shooting reinforcements of Indha Addes men arrived to the area and…	0	1561469335	SOM
5322423	706	SOM7261	7261	2011-04-28	2011	1	Strategic developments	Change to group/activity	Militia (Anti-Al Shabaab)		3	30	Eastern Africa	Somalia	Gedo	Luuq		Urkut	3.519	42.7703	2	Local Source	Local	Movement of forces: The anti-al Shabaab forces reportedly arrived to Yurkud area. The AS stationed its defensive positions, reportedly reinforced by troops from Wajid, west of Yurkud.	0	1561469335	SOM
5322421	706	SOM7259	7259	2011-04-28	2011	1	Strategic developments	Non-violent transfer of territory	Militia (Anti-Al Shabaab)		3	30	Eastern Africa	Somalia	Gedo	Garbahaarey		Garbahaarey	3.328	42.2199	1	Local Source	Local	Anti-AS forces took over Garbaharey from AS without fighting.	0	1561469335	SOM
5322428	706	SOM7266	7266	2011-04-30	2011	1	Battles	Armed clash	Al Shabaab		2	23	Eastern Africa	Somalia	Hiraan	Belet Weyne		Belet Weyne	4.736	45.2043	1	Local Source	Local	ASWJ militias based in Guri-Ceel area launched an attack against AS militias based in Wardhumale on Saturday 30/04 in the evening. ASWJ officials declared that at least two AS fighters had been killed. The total casualties figures for the two sides are of 6 killed and 5 wounded.	6	1561469335	SOM
5322430	706	SOM7268	7268	2011-04-30	2011	1	Battles	Armed clash	Al Shabaab		2	23	Eastern Africa	Somalia	Gedo	Garbahaarey		Tuulo Barwaaqo	3.5019	42.1547	1	Local Source	Local	AS forces reportedly ambushed a convoy of anti-AS forces travelling from Bulo-Xawo to Garbaharey area. AS seized a water-tanker that was eventually put on fire. No casualties were reported.	0	1561469335	SOM
5322429	706	SOM7267	7267	2011-04-30	2011	1	Battles	Armed clash	Al Shabaab		2	23	Eastern Africa	Somalia	Gedo	Garbahaarey		Garbahaarey	3.328	42.2199	1	Local Source	Local	AS and anti-AS forces were engaged in a short clash. Two patrolling groups made contact in the vicinity of Buur Gaduud, around 15km north-west of Garbaharey. The anti-AS forces lost 1 technical and 3 soldiers. Casualties on the side of AS are not known.	4	1561469335	SOM
5322428	706	SOM7266	7266	2011-04-30	2011	1	Battles	Armed clash	ASWJ: Ahlu Sunna Wal Jamaa		3	23	Eastern Africa	Somalia	Hiraan	Belet Weyne		Belet Weyne	4.736	45.2043	1	Local Source	Local	ASWJ militias based in Guri-Ceel area launched an attack against AS militias based in Wardhumale on Saturday 30/04 in the evening. ASWJ officials declared that at least two AS fighters had been killed. The total casualties figures for the two sides are of 6 killed and 5 wounded.	6	1561469335	SOM
5322430	706	SOM7268	7268	2011-04-30	2011	1	Battles	Armed clash	Militia (Anti-Al Shabaab)		3	23	Eastern Africa	Somalia	Gedo	Garbahaarey		Tuulo Barwaaqo	3.5019	42.1547	1	Local Source	Local	AS forces reportedly ambushed a convoy of anti-AS forces travelling from Bulo-Xawo to Garbaharey area. AS seized a water-tanker that was eventually put on fire. No casualties were reported.	0	1561469335	SOM
5322429	706	SOM7267	7267	2011-04-30	2011	1	Battles	Armed clash	Militia (Anti-Al Shabaab)		3	23	Eastern Africa	Somalia	Gedo	Garbahaarey		Garbahaarey	3.328	42.2199	1	Local Source	Local	AS and anti-AS forces were engaged in a short clash. Two patrolling groups made contact in the vicinity of Buur Gaduud, around 15km north-west of Garbaharey. The anti-AS forces lost 1 technical and 3 soldiers. Casualties on the side of AS are not known.	4	1561469335	SOM
5322427	706	SOM7265	7265	2011-04-30	2011	1	Strategic developments	Change to group/activity	Militia (Anti-Al Shabaab)		3	30	Eastern Africa	Somalia	Gedo	Luuq		Luuq	3.8	42.5446	1	Local Source	Local	Movement of forces: All officials of the anti-al Shabaab forces operating from Dollow moved to Bohol Bashir, between Luuq and Berdaale, in preparation of a new offensive against AS along that axis. The move has been reportedly instigated by Ethiopian officials to raise the motivation of the militias that are operating from Luuq and Bohol Bashir. AS on their side are reinforcing Yurkud with forces…	0	1561469335	SOM
5322431	706	SOM7269	7269	2011-05-01	2011	1	Explosions/Remote violence	Shelling/artillery/missile attack	Al Shabaab		2	23	Eastern Africa	Somalia	Gedo	Doolow		Bula Hawa	3.9276	41.8742	1	Local Source	Local	AS forces launched a hit-and-run attack against Bulo-Xawo in the night of 01/05/2011. The AS militias fired several mortar shells and pulled out after only a few minutes. AS later claimed that they had taken the whole town and freed AS prisoners, an assertion that was denied by officials of anti-AS militias. No casualties have yet been reported.	0	1561469335	SOM
5322431	706	SOM7269	7269	2011-05-01	2011	1	Explosions/Remote violence	Shelling/artillery/missile attack	Militia (Anti-Al Shabaab)		3	23	Eastern Africa	Somalia	Gedo	Doolow		Bula Hawa	3.9276	41.8742	1	Local Source	Local	AS forces launched a hit-and-run attack against Bulo-Xawo in the night of 01/05/2011. The AS militias fired several mortar shells and pulled out after only a few minutes. AS later claimed that they had taken the whole town and freed AS prisoners, an assertion that was denied by officials of anti-AS militias. No casualties have yet been reported.	0	1561469335	SOM
5322432	706	SOM7270	7270	2011-05-02	2011	1	Battles	Armed clash	Al Shabaab		2	23	Eastern Africa	Somalia	Gedo	Garbahaarey		Garbahaarey	3.328	42.2199	1	Local Source	Local	Heavy clashes opposed AS and anti-AS militias in Garbaharey after AS forces attempted to recapture the town in the morning of 02/05. The fighting started in the middle of the night with AS shelling the town before launching several attacks from different sides from 05.00 to mid-morning. Local residents report that at least 26 persons, mostly combatants, have been killed in the fighting. Heavy los…	26	1561469335	SOM
5322432	706	SOM7270	7270	2011-05-02	2011	1	Battles	Armed clash	Militia (Anti-Al Shabaab)		3	23	Eastern Africa	Somalia	Gedo	Garbahaarey		Garbahaarey	3.328	42.2199	1	Local Source	Local	Heavy clashes opposed AS and anti-AS militias in Garbaharey after AS forces attempted to recapture the town in the morning of 02/05. The fighting started in the middle of the night with AS shelling the town before launching several attacks from different sides from 05.00 to mid-morning. Local residents report that at least 26 persons, mostly combatants, have been killed in the fighting. Heavy los…	26	1561469335	SOM
5322433	706	SOM7271	7271	2011-05-05	2011	2	Battles	Armed clash	Military Forces of Somalia (2004-2012) Galmudug Administration		1	14	Eastern Africa	Somalia	Mudug	Gaalkacyo		Gaalkacyo	6.7697	47.4308	1	Local Source	Local	An illegal checkpoint operated by clan militias was forcefully dismantled by Galmudug authorities on the road leading to Hobyo outside of Galkacyo South. 1 person was killed and 4 others injured.	1	1561469335	SOM
5322433	706	SOM7271	7271	2011-05-05	2011	2	Battles	Armed clash	Unidentified Clan Militia (Somalia)		4	14	Eastern Africa	Somalia	Mudug	Gaalkacyo		Gaalkacyo	6.7697	47.4308	1	Local Source	Local	An illegal checkpoint operated by clan militias was forcefully dismantled by Galmudug authorities on the road leading to Hobyo outside of Galkacyo South. 1 person was killed and 4 others injured.	1	1561469335	SOM
5322436	706	SOM7274	7274	2011-05-17	2011	1	Battles	Armed clash	Al Shabaab		2	12	Eastern Africa	Somalia	Banadir	Banadir		Hodan	2.0333	45.35	1	Local Source	Local	AS attacked TFG/AMISOM positions in above mentioned areas. 2 civilians were reportedly killed and 8 others were injured.	1	1561469335	SOM
5322434	706	SOM7272	7272	2011-05-17	2011	1	Battles	Armed clash	Al Shabaab		2	12	Eastern Africa	Somalia	Banadir	Banadir		Bondhere	2.0456	45.34	1	Local Source	Local	TFG/AMISOM troops clashed with AS fighters at Boondheere district. Number of casualties is currently unknown.	0	1561469335	SOM
5322435	706	SOM7273	7273	2011-05-17	2011	1	Battles	Armed clash	Al Shabaab		2	12	Eastern Africa	Somalia	Banadir	Banadir		Hawl Wadaag	2.048	45.32	1	Local Source	Local	AS attacked TFG/AMISOM positions in above mentioned areas. 2 civilians were reportedly killed and 8 others were injured.	1	1561469335	SOM
5322438	706	SOM7276	7276	2011-05-17	2011	1	Violence against civilians	Attack	Issa Mahmud Sub-Clan Militia (Somalia)		4	47	Eastern Africa	Somalia	Mudug	Gaalkacyo		Gaalkacyo	6.7697	47.4308	1	Local Source	Local	A man belonging to Isse Mohamud sub-clan of Darood/Majerteen reportedly affiliated to one of the pirate groups was shot dead by another suspected pirate from the same sub-clan. The perpetrator was later arrested by the Galkacyo Police.	0	1561469335	SOM
5322438	706	SOM7276	7276	2011-05-17	2011	1	Violence against civilians	Attack	Civilians (Somalia)		7	47	Eastern Africa	Somalia	Mudug	Gaalkacyo		Gaalkacyo	6.7697	47.4308	1	Local Source	Local	A man belonging to Isse Mohamud sub-clan of Darood/Majerteen reportedly affiliated to one of the pirate groups was shot dead by another suspected pirate from the same sub-clan. The perpetrator was later arrested by the Galkacyo Police.	0	1561469335	SOM
5322436	706	SOM7274	7274	2011-05-17	2011	1	Battles	Armed clash	Military Forces of Somalia (2004-2012)	AMISOM: African Union Mission in Somalia (2007-)	1	12	Eastern Africa	Somalia	Banadir	Banadir		Hodan	2.0333	45.35	1	Local Source	Local	AS attacked TFG/AMISOM positions in above mentioned areas. 2 civilians were reportedly killed and 8 others were injured.	1	1561469335	SOM
5322434	706	SOM7272	7272	2011-05-17	2011	1	Battles	Armed clash	Military Forces of Somalia (2004-2012)	AMISOM: African Union Mission in Somalia (2007-)	1	12	Eastern Africa	Somalia	Banadir	Banadir		Bondhere	2.0456	45.34	1	Local Source	Local	TFG/AMISOM troops clashed with AS fighters at Boondheere district. Number of casualties is currently unknown.	0	1561469335	SOM
5322435	706	SOM7273	7273	2011-05-17	2011	1	Battles	Armed clash	Military Forces of Somalia (2004-2012)	AMISOM: African Union Mission in Somalia (2007-)	1	12	Eastern Africa	Somalia	Banadir	Banadir		Hawl Wadaag	2.048	45.32	1	Local Source	Local	AS attacked TFG/AMISOM positions in above mentioned areas. 2 civilians were reportedly killed and 8 others were injured.	1	1561469335	SOM
5322437	706	SOM7275	7275	2011-05-17	2011	1	Violence against civilians	Attack	Unidentified Armed Group (Somalia)		3	37	Eastern Africa	Somalia	Sool	Laas Caanood		Laascaanood	8.4774	47.3597	1	Local Source	Local	The Chairman of Sool Regional Court Sheikh Mohammed Ibrahim Samatar was shot dead. A civilian bystander was killed by stray bullets. The perpetrator escaped the scene. The SL security forces conducted a security operation following the shooting but the perpetrator is believed not to have been captured.	2	1561469335	SOM
5322437	706	SOM7275	7275	2011-05-17	2011	1	Violence against civilians	Attack	Civilians (Somalia)		7	37	Eastern Africa	Somalia	Sool	Laas Caanood		Laascaanood	8.4774	47.3597	1	Local Source	Local	The Chairman of Sool Regional Court Sheikh Mohammed Ibrahim Samatar was shot dead. A civilian bystander was killed by stray bullets. The perpetrator escaped the scene. The SL security forces conducted a security operation following the shooting but the perpetrator is believed not to have been captured.	2	1561469335	SOM
5322439	706	SOM7277	7277	2011-05-18	2011	1	Strategic developments	Change to group/activity	Al Shabaab		2	20	Eastern Africa	Somalia	Banadir	Banadir		Heliwa	2.0844	45.39	1	Local Source	Local	Recruitment: About 200 AS fighters arrived to Maslah building in Helowa district. They are expected to join the fighting in Hodan and Howlwadag districts in the upcoming days. Most of the recruits come from Middle Shabelle region. Reports from Middle Shabelle region indicate that most of the new fighters are student, teachers and businessmen forcefully recruited across the region.	0	1561469335	SOM
5322442	706	SOM7280	7280	2011-05-18	2011	1	Battles	Armed clash	Al Shabaab		2	12	Eastern Africa	Somalia	Banadir	Banadir		Hodan	2.0333	45.35	1	Local Source	Local	AS attacked TFG/AMISOM positions captured in the last weeks offensive. Fighting started in the morning hours by sporadic shooting and shelling and intensified in the evening after AS reinforced its positions in the contested areas. Most of the mortars fired by TFG/AMISOM were reported to have been targeting Bakara Market. At least 5 civilians died as a result of the fighting inside Bakara Market …	2	1561469335	SOM
5322441	706	SOM7279	7279	2011-05-18	2011	1	Battles	Armed clash	Al Shabaab		2	12	Eastern Africa	Somalia	Banadir	Banadir		Hawl Wadaag	2.048	45.32	1	Local Source	Local	AS attacked TFG/AMISOM positions captured in the last weeks offensive. Fighting started in the morning hours by sporadic shooting and shelling and intensified in the evening after AS reinforced its positions in the contested areas. Most of the mortars fired by TFG/AMISOM were reported to have been targeting Bakara Market. At least 5 civilians died as a result of the fighting inside Bakara Market …	3	1561469335	SOM
5322440	706	SOM7278	7278	2011-05-18	2011	1	Protests	Peaceful protest	Protesters (Somalia)		6	60	Eastern Africa	Somalia	Sanaag	Laasqoray		Badhan	10.7134	48.3325	1	Local Source	Local	On 18/05 in morning hours, unknown number of SL supporters gathered in the town to commemorate the SL Independence Day. The demonstration was dispersed by the PL Police forces who fired in the air. Later in the day a counterdemonstration protesting against SL and its interference in the local affairs was organized. Badhan was reported to be calm following the demonstrations.	0	1561469335	SOM
5322442	706	SOM7280	7280	2011-05-18	2011	1	Battles	Armed clash	Military Forces of Somalia (2004-2012)	AMISOM: African Union Mission in Somalia (2007-)	1	12	Eastern Africa	Somalia	Banadir	Banadir		Hodan	2.0333	45.35	1	Local Source	Local	AS attacked TFG/AMISOM positions captured in the last weeks offensive. Fighting started in the morning hours by sporadic shooting and shelling and intensified in the evening after AS reinforced its positions in the contested areas. Most of the mortars fired by TFG/AMISOM were reported to have been targeting Bakara Market. At least 5 civilians died as a result of the fighting inside Bakara Market …	2	1561469335	SOM
5322441	706	SOM7279	7279	2011-05-18	2011	1	Battles	Armed clash	Military Forces of Somalia (2004-2012)	AMISOM: African Union Mission in Somalia (2007-)	1	12	Eastern Africa	Somalia	Banadir	Banadir		Hawl Wadaag	2.048	45.32	1	Local Source	Local	AS attacked TFG/AMISOM positions captured in the last weeks offensive. Fighting started in the morning hours by sporadic shooting and shelling and intensified in the evening after AS reinforced its positions in the contested areas. Most of the mortars fired by TFG/AMISOM were reported to have been targeting Bakara Market. At least 5 civilians died as a result of the fighting inside Bakara Market …	3	1561469335	SOM
5322443	706	SOM7281	7281	2011-05-19	2011	1	Strategic developments	Change to group/activity	Military Forces of Ethiopia (1995-2018)		8	80	Eastern Africa	Somalia	Gedo	Doolow		Doolow	4.1642	42.0794	1	Local Source	Local	Movement of forces: Convoys of ENDF troops departed from Dollow towards Luuq and Bula Xawo. The movement reportedly followed after a return of TFG governors for Bay and Bakol regions and high ranking TFG military officials from Ethiopia back to the Gedo frontlines.	0	1561469335	SOM
5322444	706	SOM7283	7283	2011-05-20	2011	1	Battles	Armed clash	Al Shabaab		2	12	Eastern Africa	Somalia	Lower Shabelle	Afgooye		Madiina	2.2204	45.2259	1	Local Source	Local	2 artillery rounds believed to have been fired by AS landed close to Medina Hospital and a 3rd one in the vicinity of the Ice Factory in Bulo-Hubey neighborhood. 3 civilians were killed and 10 others injured as a result of the incident. It is believed that the rounds were targeting Villa Baidoa that is currently used as a TFG military headquarter and an alternative Presidential Palace.	3	1561469335	SOM
5125137	706	SOM7282	7282	2011-05-20	2011	2	Battles	Armed clash	Galgala Communal Militia (Somalia)		4	14	Eastern Africa	Somalia	Bari	Bossaso		Galgala	10.9901	49.0568	1	Crisis Watch	Other	Renewed fighting raised tensions in Puntland, as militants loyal to Mohammad Said Atom attacked govt forces in Galgala Mountains leaving at least 26, mostly insurgents, dead.	26	1555346745	SOM
5125137	706	SOM7282	7282	2011-05-20	2011	2	Battles	Armed clash	Military Forces of Somalia (2004-2012) Puntland Security Force		1	14	Eastern Africa	Somalia	Bari	Bossaso		Galgala	10.9901	49.0568	1	Crisis Watch	Other	Renewed fighting raised tensions in Puntland, as militants loyal to Mohammad Said Atom attacked govt forces in Galgala Mountains leaving at least 26, mostly insurgents, dead.	26	1555346745	SOM
5322444	706	SOM7283	7283	2011-05-20	2011	1	Battles	Armed clash	Military Forces of Somalia (2004-2012)		1	12	Eastern Africa	Somalia	Lower Shabelle	Afgooye		Madiina	2.2204	45.2259	1	Local Source	Local	2 artillery rounds believed to have been fired by AS landed close to Medina Hospital and a 3rd one in the vicinity of the Ice Factory in Bulo-Hubey neighborhood. 3 civilians were killed and 10 others injured as a result of the incident. It is believed that the rounds were targeting Villa Baidoa that is currently used as a TFG military headquarter and an alternative Presidential Palace.	3	1561469335	SOM
5322450	706	SOM7290	7290	2011-05-21	2011	1	Explosions/Remote violence	Shelling/artillery/missile attack	Al Shabaab		2	12	Eastern Africa	Somalia	Banadir	Banadir		Hodan	2.0333	45.35	1	Local Source	Local	TFG/AMISOM forces launched an attack against AS positions and managed to capture several key positions along Kidka Wadnaha Road as well as Bakara Market Junction in Hodan District. Reports indicate that Burundian troops occupied a two-storey building at the junction while TFG soldiers were positioned across the road. TFG/AMISOM forces also captured a police station, Osman Geedi Rage School and Ad…	2	1561469335	SOM
5322449	706	SOM7289	7289	2011-05-21	2011	1	Explosions/Remote violence	Shelling/artillery/missile attack	Al Shabaab		2	12	Eastern Africa	Somalia	Banadir	Banadir		Hawl Wadaag	2.048	45.32	1	Local Source	Local	TFG/AMISOM forces launched an attack against AS positions and managed to capture several key positions along Kidka Wadnaha Road as well as Bakara Market Junction in Hodan District. Reports indicate that Burundian troops occupied a two-storey building at the junction while TFG soldiers were positioned across the road. TFG/AMISOM forces also captured a police station, Osman Geedi Rage School and Ad…	2	1561469335	SOM
5322448	706	SOM7288	7288	2011-05-21	2011	1	Battles	Armed clash	Al Shabaab		2	12	Eastern Africa	Somalia	Banadir	Banadir		Hodan	2.0333	45.35	1	Local Source	Local	AS forces launched a series of counter-attacks against positions recently captured by the TFG in Mowlaca Moalim Nur area and near Pharmacy Tanad. Unconfirmed reports indicate that at least 1 civilian was killed and 3 others injured.	1	1561469335	SOM
5322447	706	SOM7287	7287	2011-05-21	2011	1	Battles	Armed clash	Al Shabaab		2	12	Eastern Africa	Somalia	Banadir	Banadir		Hawl Wadaag	2.048	45.32	1	Local Source	Local	AS forces launched a series of counter-attacks against positions recently captured by the TFG in Mowlaca Moalim Nur area and near Pharmacy Tanad. Unconfirmed reports indicate that at least 1 civilian was killed and 3 others injured.	1	1561469335	SOM
5322452	706	SOM7292	7292	2011-05-21	2011	1	Explosions/Remote violence	Remote explosive/landmine/IED	Unidentified Armed Group (Somalia)		3	37	Eastern Africa	Somalia	Banadir	Banadir		Dharkenley	2.0095	45.25	1	Local Source	Local	An IED detonated on the road between Xoosh and ex-Control Afgooye killing 2 persons. A Spokesman for TFG forces in Dharkenley District declared that the IED exploded while it was being planted, killing its 2 operators. Another non-exploded IED was reportedly recovered in the same area afterward.	2	1561469335	SOM
5322452	706	SOM7292	7292	2011-05-21	2011	1	Explosions/Remote violence	Remote explosive/landmine/IED	Civilians (Somalia)		7	37	Eastern Africa	Somalia	Banadir	Banadir		Dharkenley	2.0095	45.25	1	Local Source	Local	An IED detonated on the road between Xoosh and ex-Control Afgooye killing 2 persons. A Spokesman for TFG forces in Dharkenley District declared that the IED exploded while it was being planted, killing its 2 operators. Another non-exploded IED was reportedly recovered in the same area afterward.	2	1561469335	SOM
5322450	706	SOM7290	7290	2011-05-21	2011	1	Explosions/Remote violence	Shelling/artillery/missile attack	Military Forces of Somalia (2004-2012)	AMISOM: African Union Mission in Somalia (2007-)	1	12	Eastern Africa	Somalia	Banadir	Banadir		Hodan	2.0333	45.35	1	Local Source	Local	TFG/AMISOM forces launched an attack against AS positions and managed to capture several key positions along Kidka Wadnaha Road as well as Bakara Market Junction in Hodan District. Reports indicate that Burundian troops occupied a two-storey building at the junction while TFG soldiers were positioned across the road. TFG/AMISOM forces also captured a police station, Osman Geedi Rage School and Ad…	2	1561469335	SOM
5322449	706	SOM7289	7289	2011-05-21	2011	1	Explosions/Remote violence	Shelling/artillery/missile attack	Military Forces of Somalia (2004-2012)	AMISOM: African Union Mission in Somalia (2007-)	1	12	Eastern Africa	Somalia	Banadir	Banadir		Hawl Wadaag	2.048	45.32	1	Local Source	Local	TFG/AMISOM forces launched an attack against AS positions and managed to capture several key positions along Kidka Wadnaha Road as well as Bakara Market Junction in Hodan District. Reports indicate that Burundian troops occupied a two-storey building at the junction while TFG soldiers were positioned across the road. TFG/AMISOM forces also captured a police station, Osman Geedi Rage School and Ad…	2	1561469335	SOM
5322445	706	SOM7285	7285	2011-05-21	2011	1	Strategic developments	Change to group/activity	Militia (Anti-Al Shabaab)		3	30	Eastern Africa	Somalia	Gedo	Luuq		Urkut	3.519	42.7703	2	Local Source	Local	Movement of forces, Arrests: Anti-AS forces in Gedo Region started moving from Luuq towards Yurkud/Berdale. The anti-AS forces are supported by 2 Ethiopian battalions based in Luuq and Garbaharey. Similar movements were reported from Dhoobley towards Afmadow on 20/05. The move is apparently the first step of a new offensive targeting Bardheere and Berdale. Latest reports however indicate that the…	0	1561469335	SOM
5322446	706	SOM7286	7286	2011-05-21	2011	1	Strategic developments	Change to group/activity	Galgala Communal Militia (Somalia)		4	40	Eastern Africa	Somalia	Sanaag	Laasqoray		Ceelayo	11.2438	48.8931	1	Local Source	Local	Movement of forces: An estimated 100 to 150 Galgala insurgents reportedly arrived in Ceelayo (west of Bosasso) in the afternoon of 21/05 and withdrew at night. Puntland forces reached the town in the morning of 22/05 but didnt find any fighter.	0	1561469335	SOM
5322448	706	SOM7288	7288	2011-05-21	2011	1	Battles	Armed clash	Military Forces of Somalia (2004-2012)		1	12	Eastern Africa	Somalia	Banadir	Banadir		Hodan	2.0333	45.35	1	Local Source	Local	AS forces launched a series of counter-attacks against positions recently captured by the TFG in Mowlaca Moalim Nur area and near Pharmacy Tanad. Unconfirmed reports indicate that at least 1 civilian was killed and 3 others injured.	1	1561469335	SOM
5322447	706	SOM7287	7287	2011-05-21	2011	1	Battles	Armed clash	Military Forces of Somalia (2004-2012)		1	12	Eastern Africa	Somalia	Banadir	Banadir		Hawl Wadaag	2.048	45.32	1	Local Source	Local	AS forces launched a series of counter-attacks against positions recently captured by the TFG in Mowlaca Moalim Nur area and near Pharmacy Tanad. Unconfirmed reports indicate that at least 1 civilian was killed and 3 others injured.	1	1561469335	SOM
5322451	706	SOM7291	7291	2011-05-21	2011	1	Battles	Armed clash	Saad Clan Militia (Somalia)		4	44	Eastern Africa	Somalia	Mudug	Gaalkacyo		Gaalkacyo	6.7697	47.4308	1	Local Source	Local	Members of the Saad and Saleban clans clashed in Dowgab reportedly over the control of water resources (small stream). Casualties on the Saad side are of 1 pastoralist killed and 4 wounded. No information is available on potential casualties on the Saleban side. This clash is said to follow another clash that had occurred in Bandiiradley two days before.	1	1561469335	SOM
5322451	706	SOM7291	7291	2011-05-21	2011	1	Battles	Armed clash	Saleban Clan Militia (Somalia)		4	44	Eastern Africa	Somalia	Mudug	Gaalkacyo		Gaalkacyo	6.7697	47.4308	1	Local Source	Local	Members of the Saad and Saleban clans clashed in Dowgab reportedly over the control of water resources (small stream). Casualties on the Saad side are of 1 pastoralist killed and 4 wounded. No information is available on potential casualties on the Saleban side. This clash is said to follow another clash that had occurred in Bandiiradley two days before.	1	1561469335	SOM
5322453	706	SOM7293	7293	2011-05-22	2011	1	Strategic developments	Change to group/activity	Al Shabaab		2	20	Eastern Africa	Somalia	Gedo	Baardheere		Bardera	2.3385	42.2843	1	Local Source	Local	Movement of forces: AS forces reportedly moved towards Bardheere to reinforce positions that may be attacked by anti-AS forces. Heavy defensive positions are reported to have been set-up between Bohol Bashiir and Yurkud on the Luuq-Baidoa road.	0	1561469335	SOM
5322454	706	SOM7294	7294	2011-05-22	2011	1	Strategic developments	Change to group/activity	Al Shabaab		2	20	Eastern Africa	Somalia	Bay	Baydhaba		Berdale	3.2144	43.198	1	Local Source	Local	Movement of forces: AS forces reportedly moved towards Berdale districts to reinforce positions that may be attacked by anti-AS forces. Heavy defensive positions are reported to have been set-up between Bohol Bashiir and Yurkud on the Luuq-Baidoa road.	0	1561469335	SOM
5322458	706	SOM7298	7298	2011-05-22	2011	1	Battles	Armed clash	Al Shabaab		2	23	Eastern Africa	Somalia	Lower Juba	Afmadow		Afmadow	0.5172	42.071	1	Local Source	Local	An armed clash between anti-AS forces and AS took place in Hawina on 22/05 after AS attacked a Ras Kambooni base. Anti-AS forces repulsed the attack and on 23/05 in the morning began moving further towards AS positions in Qooqani.	0	1561469335	SOM
5322457	706	SOM7297	7297	2011-05-22	2011	1	Battles	Armed clash	Al Shabaab		2	12	Eastern Africa	Somalia	Banadir	Banadir		Wardhigley	2.0549	45.33	1	Local Source	Local	TFG and AMISOM forces launched a new offensive aiming at capturing Kidka Wadnaha Road. Heavy clashes and mortar exchange were reported from 07.00 to mid morning. By 09.45 TFG/AMISOM forces had captured Howl-Wadag Junction and had entered in parts of Bakara Market (Hormuud Telecommunications main building, Telecom office building, Dahaabshiil main office). TFG/AMISOM forces were then ordered to re…	6	1561469335	SOM
5322456	706	SOM7296	7296	2011-05-22	2011	1	Battles	Armed clash	Al Shabaab		2	12	Eastern Africa	Somalia	Banadir	Banadir		Hodan	2.0333	45.35	1	Local Source	Local	TFG and AMISOM forces launched a new offensive aiming at capturing Kidka Wadnaha Road. Heavy clashes and mortar exchange were reported from 07.00 to mid morning. By 09.45 TFG/AMISOM forces had captured Howl-Wadag Junction and had entered in parts of Bakara Market (Hormuud Telecommunications main building, Telecom office building, Dahaabshiil main office). TFG/AMISOM forces were then ordered to re…	6	1561469335	SOM
5322455	706	SOM7295	7295	2011-05-22	2011	1	Battles	Armed clash	Al Shabaab		2	12	Eastern Africa	Somalia	Banadir	Banadir		Hawl Wadaag	2.048	45.32	1	Local Source	Local	TFG and AMISOM forces launched a new offensive aiming at capturing Kidka Wadnaha Road. Heavy clashes and mortar exchange were reported from 07.00 to mid morning. By 09.45 TFG/AMISOM forces had captured Howl-Wadag Junction and had entered in parts of Bakara Market (Hormuud Telecommunications main building, Telecom office building, Dahaabshiil main office). TFG/AMISOM forces were then ordered to re…	6	1561469335	SOM
5322459	706	SOM7299	7299	2011-05-22	2011	1	Violence against civilians	Attack	AMISOM: African Union Mission in Somalia (2007-)		8	78	Eastern Africa	Somalia	Banadir	Banadir		Yaaqshiid	2.0678	45.35	1	Local Source	Local	An artillery round presumably fired by AMISOM landed in Yaakshiid District killing a newly-wed couple and injuring another woman.	2	1561469335	SOM
5322459	706	SOM7299	7299	2011-05-22	2011	1	Violence against civilians	Attack	Civilians (Somalia)		7	78	Eastern Africa	Somalia	Banadir	Banadir		Yaaqshiid	2.0678	45.35	1	Local Source	Local	An artillery round presumably fired by AMISOM landed in Yaakshiid District killing a newly-wed couple and injuring another woman.	2	1561469335	SOM
5322460	706	SOM7300	7300	2011-05-22	2011	1	Explosions/Remote violence	Remote explosive/landmine/IED	Unidentified Armed Group (Somalia)		3	38	Eastern Africa	Somalia	Banadir	Banadir		Hodan	2.0333	45.35	1	Local Source	Local	RCIED targeted a Burundian convoy traveling between the Mogadishu University and Seybiyaano. Unconfirmed reports suggest that 2 soldiers may have been killed or injured. An armor vehicle sustained minor damage.	2	1561469335	SOM
5322460	706	SOM7300	7300	2011-05-22	2011	1	Explosions/Remote violence	Remote explosive/landmine/IED	AMISOM: African Union Mission in Somalia (2007-)		8	38	Eastern Africa	Somalia	Banadir	Banadir		Hodan	2.0333	45.35	1	Local Source	Local	RCIED targeted a Burundian convoy traveling between the Mogadishu University and Seybiyaano. Unconfirmed reports suggest that 2 soldiers may have been killed or injured. An armor vehicle sustained minor damage.	2	1561469335	SOM
5322458	706	SOM7298	7298	2011-05-22	2011	1	Battles	Armed clash	Militia (Anti-Al Shabaab)		3	23	Eastern Africa	Somalia	Lower Juba	Afmadow		Afmadow	0.5172	42.071	1	Local Source	Local	An armed clash between anti-AS forces and AS took place in Hawina on 22/05 after AS attacked a Ras Kambooni base. Anti-AS forces repulsed the attack and on 23/05 in the morning began moving further towards AS positions in Qooqani.	0	1561469335	SOM
5322457	706	SOM7297	7297	2011-05-22	2011	1	Battles	Armed clash	Military Forces of Somalia (2004-2012)	AMISOM: African Union Mission in Somalia (2007-)	1	12	Eastern Africa	Somalia	Banadir	Banadir		Wardhigley	2.0549	45.33	1	Local Source	Local	TFG and AMISOM forces launched a new offensive aiming at capturing Kidka Wadnaha Road. Heavy clashes and mortar exchange were reported from 07.00 to mid morning. By 09.45 TFG/AMISOM forces had captured Howl-Wadag Junction and had entered in parts of Bakara Market (Hormuud Telecommunications main building, Telecom office building, Dahaabshiil main office). TFG/AMISOM forces were then ordered to re…	6	1561469335	SOM
5322456	706	SOM7296	7296	2011-05-22	2011	1	Battles	Armed clash	Military Forces of Somalia (2004-2012)	AMISOM: African Union Mission in Somalia (2007-)	1	12	Eastern Africa	Somalia	Banadir	Banadir		Hodan	2.0333	45.35	1	Local Source	Local	TFG and AMISOM forces launched a new offensive aiming at capturing Kidka Wadnaha Road. Heavy clashes and mortar exchange were reported from 07.00 to mid morning. By 09.45 TFG/AMISOM forces had captured Howl-Wadag Junction and had entered in parts of Bakara Market (Hormuud Telecommunications main building, Telecom office building, Dahaabshiil main office). TFG/AMISOM forces were then ordered to re…	6	1561469335	SOM
5322455	706	SOM7295	7295	2011-05-22	2011	1	Battles	Armed clash	Military Forces of Somalia (2004-2012)	AMISOM: African Union Mission in Somalia (2007-)	1	12	Eastern Africa	Somalia	Banadir	Banadir		Hawl Wadaag	2.048	45.32	1	Local Source	Local	TFG and AMISOM forces launched a new offensive aiming at capturing Kidka Wadnaha Road. Heavy clashes and mortar exchange were reported from 07.00 to mid morning. By 09.45 TFG/AMISOM forces had captured Howl-Wadag Junction and had entered in parts of Bakara Market (Hormuud Telecommunications main building, Telecom office building, Dahaabshiil main office). TFG/AMISOM forces were then ordered to re…	6	1561469335	SOM
5322463	706	SOM7304	7304	2011-05-23	2011	1	Battles	Armed clash	Al Shabaab		2	23	Eastern Africa	Somalia	Hiraan	Belet Weyne		Bacad	4.67	45.22	1	Local Source	Local	Fighters loyal to the Shabelle Valley State. (SVS) clashed with AS fighters in Baad near the border with Ethiopia. Following the fighting the SVS Minister of Information Mohammed Nur Aga-jof claimed that two of SVS fighters were injured. He further claimed that SVS captured a number of AS fighters. Unconfirmed report indicates that 7 fighters were killed in the clashes.	0	1561469335	SOM
5322465	706	SOM7306	7306	2011-05-23	2011	1	Battles	Armed clash	Al Shabaab		2	28	Eastern Africa	Somalia	Banadir	Banadir		Hawl Wadaag	2.048	45.32	1	Local Source	Local	TFG/AMISOM troops clashed with AS alongside the Wadnaha road after AS repeatedly attempted to retake recently lost positions.	0	1561469335	SOM
4944777	706	SOM7303	7303	2011-05-23	2011	1	Battles	Armed clash	Al Shabaab		2	23	Eastern Africa	Somalia	Lower Juba	Afmadow		Haawina	0.27	41.25	1	Crisis Watch	Other	Fighting reported between Ras Kamboni Brigade and Al Shabaab 23 May around Haawina in Jubba Valley.	0	1552577534	SOM
5322462	706	SOM7302	7302	2011-05-23	2011	1	Battles	Armed clash	Al Shabaab		2	23	Eastern Africa	Somalia	Lower Juba	Afmadow		Afmadow	0.5172	42.071	1	Local Source	Local	An armed clash between anti-AS forces and AS took place in Hawina on 22/05 after AS attacked a Ras Kambooni base. Anti-AS forces repulsed the attack and on 23/05 in the morning began moving further towards AS positions in Qooqani.	0	1561469335	SOM
5322464	706	SOM7305	7305	2011-05-23	2011	1	Explosions/Remote violence	Shelling/artillery/missile attack	Unidentified Armed Group (Somalia)		3	37	Eastern Africa	Somalia	Banadir	Banadir		Yaaqshiid	2.0678	45.35	1	Local Source	Local	Several mortars landed at above mentioned area during the Monday clashes.	0	1561469335	SOM
5322464	706	SOM7305	7305	2011-05-23	2011	1	Explosions/Remote violence	Shelling/artillery/missile attack	Civilians (Somalia)		7	37	Eastern Africa	Somalia	Banadir	Banadir		Yaaqshiid	2.0678	45.35	1	Local Source	Local	Several mortars landed at above mentioned area during the Monday clashes.	0	1561469335	SOM
5322463	706	SOM7304	7304	2011-05-23	2011	1	Battles	Armed clash	SVS: Shabelle Valley State Forces		3	23	Eastern Africa	Somalia	Hiraan	Belet Weyne		Bacad	4.67	45.22	1	Local Source	Local	Fighters loyal to the Shabelle Valley State. (SVS) clashed with AS fighters in Baad near the border with Ethiopia. Following the fighting the SVS Minister of Information Mohammed Nur Aga-jof claimed that two of SVS fighters were injured. He further claimed that SVS captured a number of AS fighters. Unconfirmed report indicates that 7 fighters were killed in the clashes.	0	1561469335	SOM
5322465	706	SOM7306	7306	2011-05-23	2011	1	Battles	Armed clash	AMISOM: African Union Mission in Somalia (2007-)		8	28	Eastern Africa	Somalia	Banadir	Banadir		Hawl Wadaag	2.048	45.32	1	Local Source	Local	TFG/AMISOM troops clashed with AS alongside the Wadnaha road after AS repeatedly attempted to retake recently lost positions.	0	1561469335	SOM
4944777	706	SOM7303	7303	2011-05-23	2011	1	Battles	Armed clash	Raskamboni Brigade		3	23	Eastern Africa	Somalia	Lower Juba	Afmadow		Haawina	0.27	41.25	1	Crisis Watch	Other	Fighting reported between Ras Kamboni Brigade and Al Shabaab 23 May around Haawina in Jubba Valley.	0	1552577534	SOM
5322462	706	SOM7302	7302	2011-05-23	2011	1	Battles	Armed clash	Militia (Anti-Al Shabaab)		3	23	Eastern Africa	Somalia	Lower Juba	Afmadow		Afmadow	0.5172	42.071	1	Local Source	Local	An armed clash between anti-AS forces and AS took place in Hawina on 22/05 after AS attacked a Ras Kambooni base. Anti-AS forces repulsed the attack and on 23/05 in the morning began moving further towards AS positions in Qooqani.	0	1561469335	SOM
5322461	706	SOM7301	7301	2011-05-23	2011	1	Strategic developments	Change to group/activity	Military Forces of Somalia (2004-2012) Puntland Security Force		1	10	Eastern Africa	Somalia	Bari	Bossaso		Bosaso	11.2842	49.1816	1	Local Source	Local	Movement of forces: Commander of Puntland Security Forces Said Dhere arrived to Bossaso from Garowe alongside a number of PL troops. Said Dhere was the commander of the PL Security Forces during the large security operation in Galgala in July -October 2010.	0	1561469335	SOM
5322471	706	SOM7312	7312	2011-05-24	2011	1	Battles	Armed clash	Al Shabaab		2	28	Eastern Africa	Somalia	Banadir	Banadir		Hodan	2.0333	45.35	1	Local Source	Local	TFG/AMISOM forces launched an attack in KPP Junction and African Village areas and captured the African Village compounds from AS. 5 AS fighters, 2 TFG soldiers and 1 other person were reportedly killed in the fighting.	8	1561469335	SOM
5322470	706	SOM7311	7311	2011-05-24	2011	1	Battles	Armed clash	Al Shabaab		2	28	Eastern Africa	Somalia	Banadir	Banadir		Hodan	2.0333	45.35	1	Local Source	Local	On 24/05 at around 03.00 TFG/AMISOM forces clashed with AS militias in Shirkole Officialle, Al-Baraka and KPP Junction areas in Hodan District	0	1561469335	SOM
5322469	706	SOM7310	7310	2011-05-24	2011	1	Battles	Armed clash	Al Shabaab		2	28	Eastern Africa	Somalia	Banadir	Banadir		Bondhere	2.0456	45.34	1	Local Source	Local	AS militias launched an attack against TFG/AMISOM forces near the former Ministry of Interior, the former Somaliweyn Radio Station and Monopoly Junction in Boondheere District. AS forces were forced to withdraw.	0	1561469335	SOM
5322468	706	SOM7309	7309	2011-05-24	2011	1	Battles	Armed clash	Al Shabaab		2	28	Eastern Africa	Somalia	Banadir	Banadir		Bakaara Market	2.0494	45.3199	1	Local Source	Local	On 24/05 at around 03.00 TFG/AMISOM forces clashed with AS militias in Bakara Junction in Howl-Wadag District.	0	1561469335	SOM
5322471	706	SOM7312	7312	2011-05-24	2011	1	Battles	Armed clash	AMISOM: African Union Mission in Somalia (2007-)		8	28	Eastern Africa	Somalia	Banadir	Banadir		Hodan	2.0333	45.35	1	Local Source	Local	TFG/AMISOM forces launched an attack in KPP Junction and African Village areas and captured the African Village compounds from AS. 5 AS fighters, 2 TFG soldiers and 1 other person were reportedly killed in the fighting.	8	1561469335	SOM
5322470	706	SOM7311	7311	2011-05-24	2011	1	Battles	Armed clash	AMISOM: African Union Mission in Somalia (2007-)		8	28	Eastern Africa	Somalia	Banadir	Banadir		Hodan	2.0333	45.35	1	Local Source	Local	On 24/05 at around 03.00 TFG/AMISOM forces clashed with AS militias in Shirkole Officialle, Al-Baraka and KPP Junction areas in Hodan District	0	1561469335	SOM
5322469	706	SOM7310	7310	2011-05-24	2011	1	Battles	Armed clash	AMISOM: African Union Mission in Somalia (2007-)		8	28	Eastern Africa	Somalia	Banadir	Banadir		Bondhere	2.0456	45.34	1	Local Source	Local	AS militias launched an attack against TFG/AMISOM forces near the former Ministry of Interior, the former Somaliweyn Radio Station and Monopoly Junction in Boondheere District. AS forces were forced to withdraw.	0	1561469335	SOM
5322468	706	SOM7309	7309	2011-05-24	2011	1	Battles	Armed clash	AMISOM: African Union Mission in Somalia (2007-)		8	28	Eastern Africa	Somalia	Banadir	Banadir		Bakaara Market	2.0494	45.3199	1	Local Source	Local	On 24/05 at around 03.00 TFG/AMISOM forces clashed with AS militias in Bakara Junction in Howl-Wadag District.	0	1561469335	SOM
5322466	706	SOM7307	7307	2011-05-24	2011	1	Battles	Armed clash	Military Forces of Somalia (2004-2012) Galmudug Administration		1	13	Eastern Africa	Somalia	Gedo	Ceel Waaq		El Wak	2.7352	41.0177	1	Local Source	Local	4 new illegal road-blocks have been again erected on the Bandiiradley-Galkacyo road. On 24/05 militias from the Galmudug administration (from Bandiiradley) escorting lorries travelling from South-Central to Galkacyo clashed with other Galmudug militias that had set up one of these check-points around 10km south of Galkacyo. The check-points have been reportedly set-up because the militias had not…	0	1561469335	SOM
5322466	706	SOM7307	7307	2011-05-24	2011	1	Battles	Armed clash	Unidentified Armed Group (Somalia)		3	13	Eastern Africa	Somalia	Gedo	Ceel Waaq		El Wak	2.7352	41.0177	1	Local Source	Local	4 new illegal road-blocks have been again erected on the Bandiiradley-Galkacyo road. On 24/05 militias from the Galmudug administration (from Bandiiradley) escorting lorries travelling from South-Central to Galkacyo clashed with other Galmudug militias that had set up one of these check-points around 10km south of Galkacyo. The check-points have been reportedly set-up because the militias had not…	0	1561469335	SOM
5322467	706	SOM7308	7308	2011-05-24	2011	1	Battles	Armed clash	Military Forces of Somalia (2004-2012) Galmudug Administration		1	13	Eastern Africa	Somalia	Mudug	Gaalkacyo		Gaalkacyo	6.7697	47.4308	2	Local Source	Local	4 new illegal road-blocks have been again erected on the Bandiiradley-Galkacyo road. On 24/05 militias from the Galmudug administration (from Bandiiradley) escorting lorries travelling from South-Central to Galkacyo clashed with other Galmudug militias that had set up one of these check-points around 10km south of Galkacyo. The check-points have been reportedly set-up because the militias had not…	0	1561469335	SOM
5322467	706	SOM7308	7308	2011-05-24	2011	1	Battles	Armed clash	Unidentified Armed Group (Somalia)		3	13	Eastern Africa	Somalia	Mudug	Gaalkacyo		Gaalkacyo	6.7697	47.4308	2	Local Source	Local	4 new illegal road-blocks have been again erected on the Bandiiradley-Galkacyo road. On 24/05 militias from the Galmudug administration (from Bandiiradley) escorting lorries travelling from South-Central to Galkacyo clashed with other Galmudug militias that had set up one of these check-points around 10km south of Galkacyo. The check-points have been reportedly set-up because the militias had not…	0	1561469335	SOM
5322474	706	SOM7315	7315	2011-05-25	2011	1	Explosions/Remote violence	Shelling/artillery/missile attack	Al Shabaab		2	27	Eastern Africa	Somalia	Banadir	Banadir		Waaberi	2.0195	45.31	1	Local Source	Local	Two mortars that are believed to have been fired by AS landed on a house near Musa Boqor Mosque. The second mortar is believed to have landed in the area after a group of people gathered in the location in order to help the victim of the first mortar explosion. 5 persons were reportedly killed and 7 others injured.	5	1561469335	SOM
5322472	706	SOM7313	7313	2011-05-25	2011	1	Strategic developments	Change to group/activity	Al Shabaab		2	20	Eastern Africa	Somalia	Bay	Qansax Dheere		Qansax Dheere	2.8712	43.0043	1	Local Source	Local	Movement of forces: At least 20 foreign fighters belonging to AS were reportedly seen alongside an unspecified number of other AS militiamen. The fighters are believed to have arrived to the area form Baidoa.	0	1561469335	SOM
5322473	706	SOM7314	7314	2011-05-25	2011	1	Battles	Armed clash	Al Shabaab		2	12	Eastern Africa	Somalia	Banadir	Banadir		Hawl Wadaag	2.048	45.32	1	Local Source	Local	Fighting between TFG/AMISOM troops and AS fighters took place near Hormud and Malintajir buildings and Hawlwadag junction. The fighting is believed to have broken out after AS attacked TFG/AMISOM positions in the area.	0	1561469335	SOM
5322475	706	SOM7316	7316	2011-05-25	2011	1	Explosions/Remote violence	Remote explosive/landmine/IED	Unidentified Armed Group (Somalia)		3	37	Eastern Africa	Somalia	Gedo	Luuq		Luuq	3.8	42.5446	2	Local Source	Local	A commercial truck triggered and explosion of a landmine in Laamilay area on the road between Luuq and Bula Xawo.	0	1561469335	SOM
5322475	706	SOM7316	7316	2011-05-25	2011	1	Explosions/Remote violence	Remote explosive/landmine/IED	Civilians (Somalia)		7	37	Eastern Africa	Somalia	Gedo	Luuq		Luuq	3.8	42.5446	2	Local Source	Local	A commercial truck triggered and explosion of a landmine in Laamilay area on the road between Luuq and Bula Xawo.	0	1561469335	SOM
5322474	706	SOM7315	7315	2011-05-25	2011	1	Explosions/Remote violence	Shelling/artillery/missile attack	Civilians (Somalia)		7	27	Eastern Africa	Somalia	Banadir	Banadir		Waaberi	2.0195	45.31	1	Local Source	Local	Two mortars that are believed to have been fired by AS landed on a house near Musa Boqor Mosque. The second mortar is believed to have landed in the area after a group of people gathered in the location in order to help the victim of the first mortar explosion. 5 persons were reportedly killed and 7 others injured.	5	1561469335	SOM
5322473	706	SOM7314	7314	2011-05-25	2011	1	Battles	Armed clash	Military Forces of Somalia (2004-2012)	AMISOM: African Union Mission in Somalia (2007-)	1	12	Eastern Africa	Somalia	Banadir	Banadir		Hawl Wadaag	2.048	45.32	1	Local Source	Local	Fighting between TFG/AMISOM troops and AS fighters took place near Hormud and Malintajir buildings and Hawlwadag junction. The fighting is believed to have broken out after AS attacked TFG/AMISOM positions in the area.	0	1561469335	SOM
5322476	706	SOM7317	7317	2011-05-26	2011	1	Strategic developments	Non-violent transfer of territory	Al Shabaab		2	20	Eastern Africa	Somalia	Gedo	Ceel Waaq		Busaar	2.6778	41.3254	1	Local Source	Local	AS forces quickly reacted to the evacuation of Buusaar by anti-AS militias and re-occupied the village without fighting. In an interview with local medias the TFG Governor for Gedo Region Mohamed Abdi Kaliil however denied that any tension had arisen between his forces and that his militias had pulled out of Buusaar. He further stated that his administration had called for AS forces to lay down t…	0	1561469335	SOM
5322477	706	SOM7318	7318	2011-05-26	2011	1	Strategic developments	Change to group/activity	Militia (Anti-Al Shabaab)		3	30	Eastern Africa	Somalia	Gedo	Ceel Waaq		Busaar	2.6778	41.3254	1	Local Source	Local	Anti-AS troops reportedly vacated Buusaar following an internal dispute.	0	1561469335	SOM
5322478	706	SOM7319	7319	2011-05-26	2011	1	Battles	Armed clash	SSC: Sool, Sanaag and Cayn Militia		3	13	Eastern Africa	Somalia	Sool	Laas Caanood		Laascaanood	8.4774	47.3597	1	Local Source	Local	SSC militias reportedly attacked Somaliland army positions in Gambadhe on 26/05/2011 at around midnight. 2 Somaliland soldiers were reportedly killed as well as a woman from the area	2	1561469335	SOM
5322478	706	SOM7319	7319	2011-05-26	2011	1	Battles	Armed clash	Military Forces of Somaliland (2010-)		1	13	Eastern Africa	Somalia	Sool	Laas Caanood		Laascaanood	8.4774	47.3597	1	Local Source	Local	SSC militias reportedly attacked Somaliland army positions in Gambadhe on 26/05/2011 at around midnight. 2 Somaliland soldiers were reportedly killed as well as a woman from the area	2	1561469335	SOM
5322479	706	SOM7320	7320	2011-05-26	2011	1	Battles	Armed clash	Mudug Authority Militia		3	33	Eastern Africa	Somalia	Mudug	Gaalkacyo		Gaalkacyo	6.7697	47.4308	1	Local Source	Local	A police patrol patrolling in Hormar neighborhood was shot at by 3 teenagers it had attempted to stop and control. The teenagers started shooting at the patrol with two pistols immediately after they were instructed to stop. The police shot back injuring one of the attackers who was arrested while the two others escaped. The man arrested was reportedly carrying hand grenades. The identity and mot…	0	1561469335	SOM
5322479	706	SOM7320	7320	2011-05-26	2011	1	Battles	Armed clash	Unidentified Armed Group (Somalia)		3	33	Eastern Africa	Somalia	Mudug	Gaalkacyo		Gaalkacyo	6.7697	47.4308	1	Local Source	Local	A police patrol patrolling in Hormar neighborhood was shot at by 3 teenagers it had attempted to stop and control. The teenagers started shooting at the patrol with two pistols immediately after they were instructed to stop. The police shot back injuring one of the attackers who was arrested while the two others escaped. The man arrested was reportedly carrying hand grenades. The identity and mot…	0	1561469335	SOM
5322480	706	SOM7321	7321	2011-05-27	2011	1	Strategic developments	Change to group/activity	Al Shabaab		2	20	Eastern Africa	Somalia	Banadir	Banadir		Mogadishu	2.0414	45.3337	1	Local Source	Local	Recruitment: Hundreds of AS fighters recruited in Bay, Bakol and Middle and Lower Shabelle region reaches Mogadishu on Thursday and Friday. The new AS fighters were reportedly deployed at former Spaghetti factory (Yaqshid district), Mogadishu Stadium (Wardhigley district) and Kahda (Dharkenley district). No change of balance of power was reported from the locations since the reported deployment.	0	1561469335	SOM
5322482	706	SOM7323	7323	2011-05-27	2011	1	Battles	Armed clash	Al Shabaab		2	12	Eastern Africa	Somalia	Banadir	Banadir		Hodan	2.0333	45.35	1	Local Source	Local	TFG/AMISOM forces launched attacks against AS positions at African Village, Sheikh Ali Sufi Mosque and Vegetable & Grass market in Hodan district. At least 10 people including civilians (6 AS fighters and 1 TFG soldier confirmed) were killed in the fighting and 15 others were injured. AS reportedly relocated its fighters to the milk market section of the Bakara Market and Al-baraka junction follo…	10	1561469335	SOM
5322481	706	SOM7322	7322	2011-05-27	2011	1	Battles	Armed clash	Al Shabaab		2	12	Eastern Africa	Somalia	Banadir	Banadir		Hodan	2.0333	45.35	1	Local Source	Local	Sporadic clashes were reported on 27/05 after TFG/AMISOM forces launched an attack on AS positions in Hodan District. 2 people were reportedly killed and seven injured. The operation was part of the general offensive aimed at pushing AS out of Bakara Market.	0	1561469335	SOM
5322482	706	SOM7323	7323	2011-05-27	2011	1	Battles	Armed clash	Military Forces of Somalia (2004-2012)	AMISOM: African Union Mission in Somalia (2007-)	1	12	Eastern Africa	Somalia	Banadir	Banadir		Hodan	2.0333	45.35	1	Local Source	Local	TFG/AMISOM forces launched attacks against AS positions at African Village, Sheikh Ali Sufi Mosque and Vegetable & Grass market in Hodan district. At least 10 people including civilians (6 AS fighters and 1 TFG soldier confirmed) were killed in the fighting and 15 others were injured. AS reportedly relocated its fighters to the milk market section of the Bakara Market and Al-baraka junction follo…	10	1561469335	SOM
[truncated: 41,296 more rows]
